# Supplementary material for: Neuronal apoptosis drives remodeling states of microglia and shifts in survival pathway dependence
Source: eLife journal article supplement (doi:10.7554/elife.76564), 2022-04-28
Supplement: supp [file elife-76564-supp-v1.zip]

**A Sample 1**

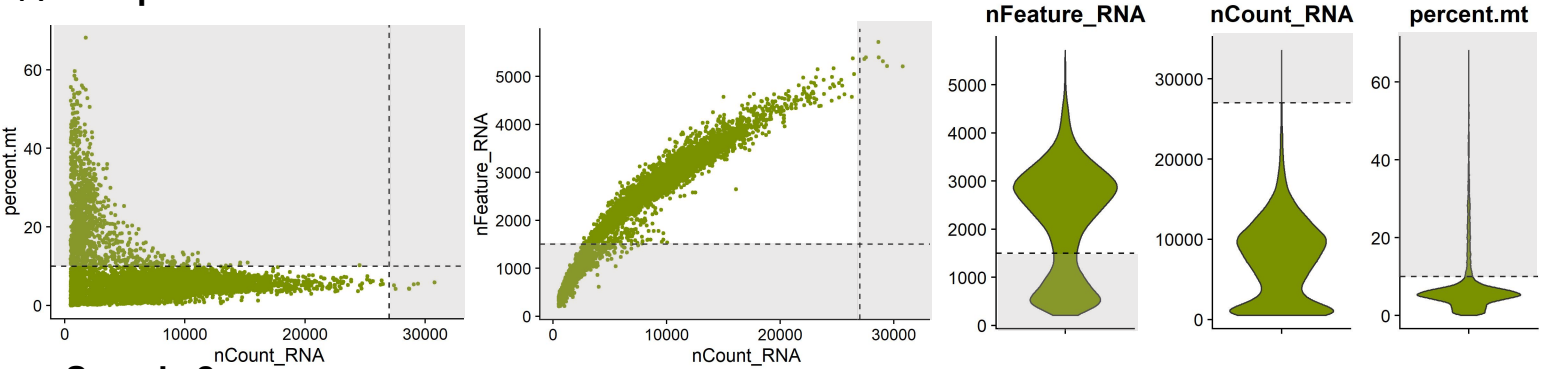

**B Sample 2**

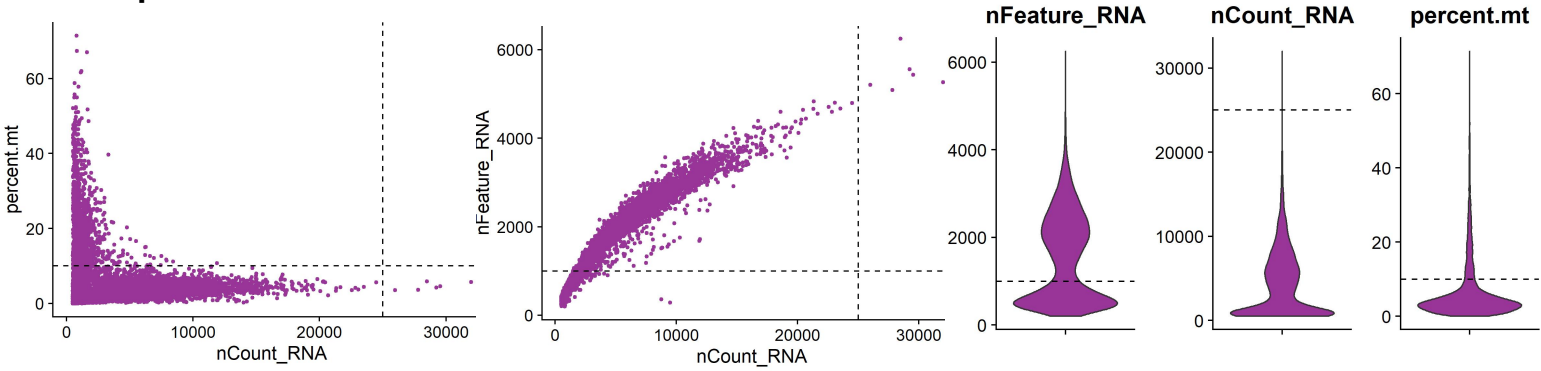

**C Vehicle**

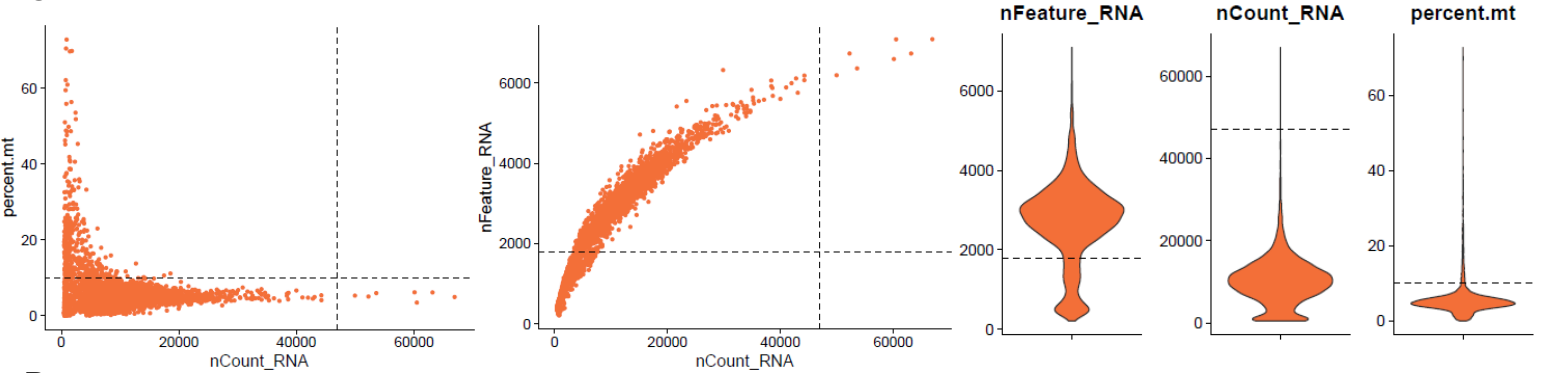

**D PLX**

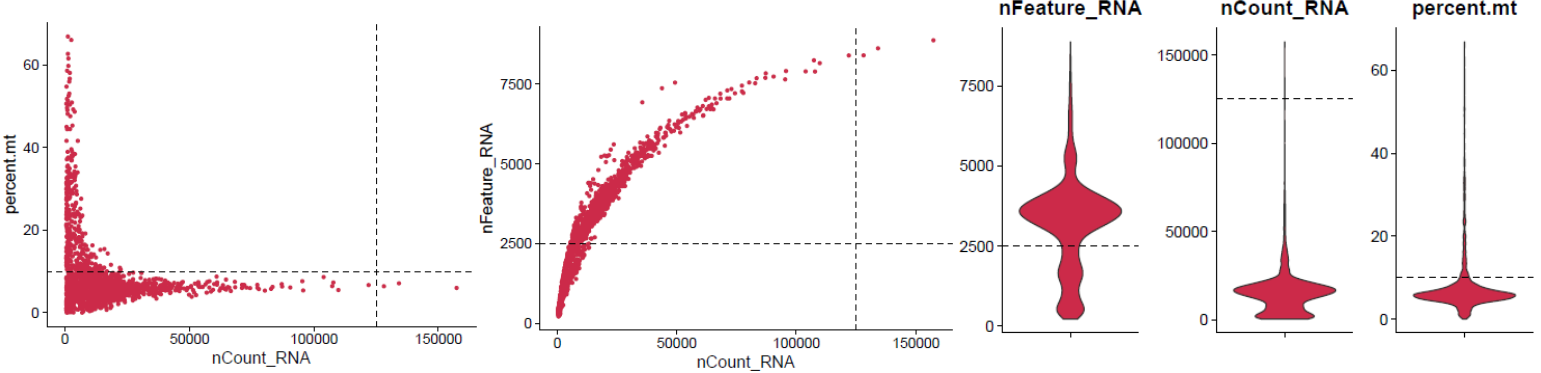

**E**

|          | Filtered by CellRanger |                 |                |        | Manually filtered |                 |                |        |
|----------|------------------------|-----------------|----------------|--------|-------------------|-----------------|----------------|--------|
|          | # cells                | Counts per cell | Genes per cell | Mito % | # cells           | Counts per cell | Genes per cell | Mito % |
| Sample 1 | 7,499                  | 7,532           | 2,241          | 7.36   | 5,237             | 9,922           | 2,845          | 5.24   |
| Sample 2 | 7,072                  | 4,359           | 1,531          | 6.66   | 3,889             | 7,012           | 2,290          | 3.68   |
| Vehicle  | 5,117                  | 10,271          | 2,696          | 5.84   | 4,198             | 11,876          | 3,056          | 4.77   |
| PLX      | 2,437                  | 15,777          | 3,186          | 7.90   | 1,760             | 20,011          | 3,862          | 5.61   |
