# Supplementary material for: Neuronal apoptosis drives remodeling states of microglia and shifts in survival pathway dependence
Source: eLife. 2022 Apr 28;11:e76564. doi: 10.7554/eLife.76564 (PMC9071266; doi:10.7554/eLife.76564)
Supplement: Supplementary file 1. — Upregulated and downregulated genes for each of the 11 scRNAseq clusters. [file elife-76564-supp1.xlsx]

## Sheet: cluster marks, up and down
p_val	avg_log2FC	pct.1	pct.2	p_val_adj	cluster	gene
0	0.503663	1	0.999	0	0	Gm42418
2.83e-157	0.437044	0.851	0.683	4.58e-153	0	AY036118
7.14e-232	0.415052	1	1	1.15e-227	0	Ctsd
2.47e-171	0.372053	1	1	3.98e-167	0	Apoe
4.02e-130	0.330122	0.998	0.996	6.5e-126	0	mt-Nd3
9.08e-236	0.328628	1	1	1.47e-231	0	Grn
6.89e-177	0.323666	1	0.997	1.11e-172	0	Timp2
3.01e-56	0.319476	0.988	0.985	4.86e-52	0	Pkm
9.13e-72	0.305292	0.669	0.515	1.48e-67	0	Scd2
2.32e-76	0.293833	0.91	0.842	3.74e-72	0	Hk2
3.38e-55	0.289794	0.933	0.924	5.46e-51	0	Mif
1.02e-133	0.281648	1	0.998	1.65e-129	0	Hexa
1.08e-81	0.280823	0.619	0.432	1.74e-77	0	Cst7
1.8e-98	0.279213	0.989	0.958	2.91e-94	0	Abca1
1.91e-139	0.277365	1	0.998	3.09e-135	0	Fcrls
5.39e-132	0.273344	1	1	8.71e-128	0	Ctsb
5.69e-85	0.266125	0.658	0.48	9.19e-81	0	Lars2
1.89e-129	0.26341	1	0.999	3.05e-125	0	Ctsa
3.78e-36	0.260001	0.88	0.857	6.11e-32	0	Tpi1
1.57e-55	0.258527	0.795	0.682	2.54e-51	0	Slc12a2
7.4e-61	0.254824	0.829	0.72	1.2e-56	0	mt-Atp8
2.49e-117	0.25411	1	0.997	4.03e-113	0	Lyz2
2.78e-60	-0.25408	0.981	0.987	4.49e-56	0	Mcl1
7.16e-24	-0.256022	0.278	0.35	1.16e-19	0	Cks2
4.46e-83	-0.25778	0.999	0.999	7.2e-79	0	Ddx5
5.33e-58	-0.257974	0.937	0.959	8.61e-54	0	Srsf3
2.16e-47	-0.258181	0.748	0.802	3.49e-43	0	Tubb2a
4.28e-37	-0.258463	0.765	0.791	6.91e-33	0	Nfe2l2
3.17e-41	-0.258868	0.754	0.789	5.12e-37	0	Brd2
8.22e-44	-0.261972	0.892	0.906	1.33e-39	0	Ppp1r10
1.36e-48	-0.266882	0.965	0.972	2.2e-44	0	Hsp90aa1
2.27e-49	-0.268653	0.93	0.954	3.66e-45	0	Zfand5
1.23e-57	-0.273244	0.839	0.874	1.98e-53	0	Atf4
4.13e-24	-0.274801	0.907	0.916	6.68e-20	0	Tuba1b
2.47e-51	-0.275331	0.892	0.916	3.99e-47	0	Mat2a
1.72e-34	-0.277402	0.582	0.641	2.79e-30	0	Ddit3
8.38e-15	-0.280311	0.155	0.205	1.35e-10	0	Smc2
1.08e-21	-0.287732	0.507	0.545	1.74e-17	0	Alox5ap
1.56e-141	-0.288694	1	1	2.52e-137	0	H3f3b
7.18e-35	-0.289918	0.841	0.876	1.16e-30	0	Klf6
4.8e-15	-0.294732	0.964	0.979	7.75e-11	0	Prdx1
0.000479	-0.297504	0.706	0.658	1	0	Fabp5
7.05e-35	-0.302826	0.199	0.289	1.14e-30	0	Nr4a1
9.75e-10	-0.305131	0.362	0.401	1.58e-05	0	Rgs1
2.58e-51	-0.305761	0.97	0.971	4.16e-47	0	Btg2
1.81e-27	-0.308049	0.53	0.579	2.93e-23	0	Cd14
1.38e-31	-0.308068	0.551	0.609	2.23e-27	0	Klf4
7.02e-51	-0.308342	0.558	0.643	1.13e-46	0	Srsf7
2.4e-58	-0.31192	0.809	0.85	3.88e-54	0	Zfp36l1
8.86e-198	-0.31203	1	1	1.43e-193	0	Eif1
3.2e-54	-0.315264	0.946	0.961	5.17e-50	0	Nfkbia
2.99e-72	-0.319578	0.899	0.936	4.84e-68	0	Dnaja1
7.57e-54	-0.320111	0.32	0.444	1.22e-49	0	Socs3
1.57e-40	-0.320649	0.478	0.557	2.53e-36	0	Adrb2
1.75e-75	-0.321886	0.8	0.86	2.83e-71	0	Jpt1
2.83e-30	-0.326829	0.227	0.314	4.57e-26	0	Hspa1a
6.22e-66	-0.329172	0.959	0.972	1.01e-61	0	Rhob
1.36e-118	-0.329416	1	0.999	2.19e-114	0	Ptma
1.13e-51	-0.333337	0.52	0.611	1.82e-47	0	Ints6
3.17e-73	-0.334203	0.94	0.949	5.12e-69	0	Srsf2
1.12e-46	-0.336439	0.393	0.493	1.81e-42	0	Marcksl1
9.16e-60	-0.34445	0.816	0.856	1.48e-55	0	Cited2
1.78e-05	-0.346574	0.302	0.325	0.288242	0	Gclm
2.94e-98	-0.348973	0.989	0.988	4.74e-94	0	Egr1
1.56e-58	-0.351187	0.975	0.975	2.52e-54	0	Jun
1.56e-61	-0.355409	0.63	0.702	2.52e-57	0	Sertad1
2.35e-27	-0.355662	0.5	0.551	3.8e-23	0	Tubb4b
6.77e-58	-0.356014	0.927	0.948	1.09e-53	0	Ier2
1.39e-69	-0.364228	0.961	0.974	2.24e-65	0	Ier3
3.98e-23	-0.370313	0.405	0.449	6.42e-19	0	Npl
1.42e-92	-0.370431	0.901	0.932	2.29e-88	0	Dynll1
2.52e-127	-0.373079	0.993	0.991	4.07e-123	0	Rsrp1
8.97e-18	-0.384152	0.067	0.113	1.45e-13	0	Hist1h2ap
4.93e-47	-0.384756	0.936	0.962	7.97e-43	0	Fos
1.06e-62	-0.384979	0.792	0.849	1.71e-58	0	Dusp1
3.71e-26	-0.388128	0.68	0.701	6e-22	0	Hmgb2
1.06e-51	-0.391525	0.686	0.748	1.71e-47	0	Gadd45b
9.62e-76	-0.400839	0.743	0.803	1.55e-71	0	Ube2s
9.49e-50	-0.401395	0.559	0.628	1.53e-45	0	Tmsb10
5.73e-66	-0.40489	0.492	0.598	9.26e-62	0	Ifrd1
1.47e-34	-0.40671	0.549	0.6	2.38e-30	0	Id2
1.29e-101	-0.41722	0.818	0.882	2.09e-97	0	Ppp1r15a
2.04e-126	-0.42246	0.869	0.916	3.29e-122	0	Wsb1
1.47e-52	-0.436425	0.931	0.946	2.37e-48	0	Klf2
1.12e-36	-0.438798	0.239	0.331	1.81e-32	0	Ccl2
4.7e-55	-0.450071	0.36	0.474	7.59e-51	0	Tnf
2.16e-73	-0.453371	1	1	3.49e-69	0	Fth1
2.8e-110	-0.46177	0.878	0.938	4.52e-106	0	Uba52
1.16e-99	-0.467466	0.988	0.996	1.88e-95	0	H2afz
1.09e-45	-0.470103	0.47	0.559	1.76e-41	0	Dusp2
8.33e-25	-0.471992	0.509	0.555	1.35e-20	0	Ccl12
9.6e-30	-0.477688	0.686	0.663	1.55e-25	0	Tmem119
1.81e-37	-0.479932	0.696	0.721	2.93e-33	0	Cd83
2.48e-107	-0.480728	0.55	0.676	4.01e-103	0	Cebpb
1.42e-195	-0.487066	0.961	0.978	2.29e-191	0	Ier5
2.33e-184	-0.492629	0.995	0.993	3.76e-180	0	Junb
2.46e-73	-0.553088	0.517	0.611	3.97e-69	0	Il1a
8.68e-43	-0.559045	0.245	0.349	1.4e-38	0	Cdkn1a
8.84e-17	-0.569979	0.517	0.541	1.43e-12	0	Stmn1
2.64e-142	-0.576591	0.795	0.873	4.26e-138	0	Zfp36
4.01e-26	-0.767375	0.057	0.112	6.47e-22	0	Cxcl10
3.32e-149	-0.802966	0.781	0.892	5.36e-145	0	Atf3
4.79e-38	-0.901665	0.122	0.206	7.74e-34	0	Il1b
7.62e-144	-1.02708	0.818	0.9	1.23e-139	0	Ccl3
5.68e-11	-1.1143	0.757	0.753	9.18e-07	0	Hmox1
2.57e-37	-1.21687	0.057	0.126	4.15e-33	0	Cxcl2
9.34e-128	-1.33686	0.773	0.866	1.51e-123	0	Ccl4
9.5e-103	-2.14124	0.435	0.546	1.53e-98	0	Ftl1-ps1
0	1.74752	0.857	0.414	0	1	Ftl1-ps1
0	1.22867	0.927	0.598	0	1	Tmem119
0	0.92789	1	0.954	0	1	P2ry12
0	0.76957	0.975	0.884	0	1	Selplg
0	0.687451	0.958	0.843	0	1	Arhgap5
0	0.512317	1	0.999	0	1	Ddx5
0	0.413819	1	1	0	1	H3f3b
0	-0.488421	1	1	0	1	Ctsz
0	-0.527984	0.999	0.999	0	1	Ctsa
0	-0.54975	1	1	0	1	mt-Nd2
0	-0.564375	0.997	0.999	0	1	Hexa
0	-0.731777	0.996	0.998	0	1	Timp2
0	-0.732997	0.994	0.997	0	1	Creg1
0	-0.740552	0.817	0.926	0	1	Pld3
0	-0.745969	1	0.999	0	1	Cd63
0	-0.751979	0.161	0.577	0	1	Nceh1
0	-0.786524	0.225	0.637	0	1	Anxa5
0	-0.81401	1	1	0	1	Ctsb
0	-0.850306	0.285	0.711	0	1	Gm1673
0	-0.877427	0.251	0.745	0	1	Bax
0	-0.930417	1	1	0	1	Ctsd
0	-0.964031	0.15	0.587	0	1	Cst7
0	-1.0233	0.636	0.841	0	1	Plin2
0	-1.07403	1	1	0	1	Apoe
0	-1.24146	0.134	0.627	0	1	Igf1
0	-1.31765	0.997	0.998	0	1	Lyz2
0	-1.41672	0.67	0.826	0	1	Lpl
0	-1.98342	0.969	0.989	0	1	Ftl1
2.47e-298	-0.4633	1	1	3.99e-294	1	mt-Co3
5.09e-298	-0.364224	1	1	8.22e-294	1	Tyrobp
6.26e-290	-0.988348	0.906	0.933	1.01e-285	1	Mif
1.74e-280	0.630622	0.974	0.863	2.81e-276	1	Siglech
4.04e-280	-0.845164	0.982	0.987	6.53e-276	1	Pkm
1.53e-279	-1.62446	0.491	0.724	2.47e-275	1	Fabp5
1.15e-271	-0.496352	1	1	1.85e-267	1	mt-Nd1
9.01e-268	-0.700271	0.963	0.978	1.46e-263	1	Aldoa
6.07e-267	-0.604234	0.998	0.996	9.81e-263	1	mt-Nd3
1.99e-266	-0.36752	1	1	3.21e-262	1	Lamp1
1.4e-261	-0.567199	1	1	2.26e-257	1	Gapdh
9.81e-258	0.511644	0.996	0.964	1.58e-253	1	Lpcat2
2.58e-252	0.498475	1	0.999	4.17e-248	1	Malat1
3.08e-251	0.526448	1	0.997	4.98e-247	1	Cx3cr1
2.33e-250	0.700615	0.918	0.755	3.77e-246	1	Ltc4s
9.33e-243	-0.317493	1	1	1.51e-238	1	Trem2
2.4e-242	-0.576036	1	0.999	3.88e-238	1	Selenop
5.38e-237	0.519901	0.999	0.99	8.69e-233	1	Rsrp1
2.51e-236	-0.562135	0.981	0.98	4.05e-232	1	Syngr1
1.1e-235	0.556475	0.979	0.897	1.77e-231	1	Zfhx3
1.24e-235	0.35666	1	1	2e-231	1	Rps11
2.85e-232	-0.394135	1	1	4.61e-228	1	Grn
1.68e-230	0.572975	0.974	0.907	2.72e-226	1	Dynll1
1.51e-228	-0.371291	1	1	2.44e-224	1	mt-Atp6
3.51e-228	-2.32068	0.042	0.338	5.66e-224	1	Spp1
3e-225	0.51084	1	0.985	4.84e-221	1	Egr1
2.89e-224	-0.533543	0.204	0.545	4.67e-220	1	Psat1
1.48e-221	0.536639	0.982	0.936	2.38e-217	1	Srsf2
1.79e-218	0.327999	1	1	2.9e-214	1	Rps24
2.1e-216	-0.504976	0.968	0.982	3.4e-212	1	Ucp2
1.48e-202	0.640039	0.665	0.437	2.39e-198	1	Cebpd
2e-202	-0.486843	0.993	0.993	3.23e-198	1	Cd68
1.32e-199	-0.447322	0.992	0.993	2.13e-195	1	Cotl1
4.81e-197	-0.346714	1	1	7.78e-193	1	mt-Cytb
3.11e-196	0.577628	0.931	0.819	5.03e-192	1	Cited2
1.65e-195	-0.366284	1	1	2.66e-191	1	Cyba
1.86e-191	0.671004	0.756	0.564	3e-187	1	Tmsb10
3.54e-190	-0.293237	1	1	5.72e-186	1	Npc2
5.03e-186	-0.881583	0.043	0.298	8.12e-182	1	Lgals3
7.9e-186	0.473868	0.988	0.934	1.28e-181	1	Ptgs1
2.61e-185	-0.468929	0.956	0.971	4.21e-181	1	Abca1
4.78e-183	0.316324	1	1	7.73e-179	1	Lgmn
1.62e-182	-0.555438	0.106	0.384	2.62e-178	1	Ank
1.48e-181	0.57024	0.94	0.84	2.39e-177	1	Ppp1r15a
1.44e-180	0.290678	1	1	2.32e-176	1	Rpl10
2.16e-180	-0.473832	0.233	0.542	3.49e-176	1	Acadl
3.74e-180	0.532563	0.916	0.815	6.05e-176	1	Zfp36l1
1.77e-179	-0.401303	0.991	0.993	2.86e-175	1	Abhd12
6.77e-179	0.534159	0.885	0.743	1.09e-174	1	Ecscr
1.37e-178	-0.837922	0.546	0.76	2.22e-174	1	Cd83
2.96e-177	0.498039	0.967	0.883	4.78e-173	1	Ppp1r10
3.47e-177	-0.433764	0.068	0.329	5.6e-173	1	Vat1
3.32e-175	0.356904	1	0.999	5.37e-171	1	Rpl23a
3.37e-174	-0.475696	0.089	0.354	5.44e-170	1	Anxa2
3.94e-174	-0.506039	0.085	0.346	6.36e-170	1	Sash1
1.78e-172	-0.320056	1	1	2.87e-168	1	mt-Co2
4.81e-172	-0.457827	0.298	0.598	7.76e-168	1	Glb1
1.89e-169	0.428923	0.997	0.966	3.05e-165	1	Ier5
1.1e-168	-0.503902	0.409	0.699	1.77e-164	1	Ninj1
3.75e-168	-0.454755	0.198	0.488	6.05e-164	1	Gpr137b
4.4e-168	-0.500077	0.465	0.744	7.11e-164	1	Rcbtb2
1.8e-166	-0.45046	0.248	0.542	2.9e-162	1	Uap1l1
9e-165	0.285431	1	1	1.45e-160	1	Rps9
1.91e-164	-0.252176	1	1	3.09e-160	1	Actb
1.15e-163	0.468594	0.972	0.918	1.86e-159	1	Tgfbr1
1.64e-163	-0.575695	0.652	0.828	2.64e-159	1	Lipa
1.55e-162	0.523403	0.928	0.816	2.5e-158	1	Pmepa1
2.59e-162	-0.443192	0.027	0.253	4.19e-158	1	Rab7b
7.63e-162	0.639906	0.587	0.364	1.23e-157	1	Nav3
1.27e-160	-0.428142	0.288	0.585	2.06e-156	1	Gaa
1.56e-159	0.448626	0.997	0.984	2.52e-155	1	Mafb
1.23e-158	-0.62902	0.696	0.829	1.99e-154	1	Pgk1
4.27e-158	0.288145	1	1	6.9e-154	1	Rps3a1
8.89e-158	0.32643	1	0.999	1.44e-153	1	Ptma
1.23e-155	-1.44842	0.361	0.579	1.99e-151	1	Apoc1
2.08e-154	-0.615284	0.839	0.888	3.36e-150	1	Pgam1
7.16e-154	-0.663396	0.068	0.302	1.16e-149	1	Lgals1
7.61e-154	-0.462542	0.57	0.804	1.23e-149	1	Dhrs3
1.81e-153	-0.475597	0.592	0.808	2.92e-149	1	Lrpap1
1.32e-152	-0.518328	0.939	0.959	2.13e-148	1	Bcl2a1b
1.65e-152	-0.682831	0.525	0.738	2.66e-148	1	Ccl6
7.37e-149	-0.74912	0.978	0.975	1.19e-144	1	Mt1
7.55e-149	-0.375346	0.978	0.984	1.22e-144	1	Prdx5
1.26e-148	-0.299469	1	1	2.03e-144	1	Psap
1.27e-148	-0.357136	0.06	0.289	2.05e-144	1	Atp1a3
2.43e-148	-0.433889	0.441	0.718	3.93e-144	1	Dtnbp1
8.7e-148	0.492348	0.928	0.814	1.41e-143	1	Itgam
3.63e-147	-0.436524	0.42	0.698	5.86e-143	1	Ndufa1
1.86e-146	-0.482352	0.786	0.891	3.01e-142	1	Psmb6
2.13e-146	0.502475	0.883	0.767	3.44e-142	1	Ccr5
7.1e-144	-0.445338	0.337	0.616	1.15e-139	1	Rhoc
1.81e-142	-0.436204	0.623	0.832	2.93e-138	1	H2afj
3.78e-142	-0.331107	1	1	6.1e-138	1	Ctsl
1.31e-141	0.429173	1	0.968	2.12e-137	1	Jun
1.5e-141	-0.439168	0.593	0.819	2.42e-137	1	Abcg1
3.71e-141	0.548821	0.672	0.494	5.99e-137	1	Alox5ap
4.62e-141	0.471747	0.956	0.874	7.46e-137	1	Maf
9.86e-141	-0.563702	0.117	0.36	1.59e-136	1	Mt2
2.01e-140	-0.468998	0.117	0.356	3.24e-136	1	Crip1
2.98e-140	-0.417457	0.955	0.967	4.81e-136	1	Bri3
4.08e-140	0.705609	0.729	0.594	6.59e-136	1	Gadd45g
1.49e-139	-0.388944	0.083	0.313	2.41e-135	1	Gas2l3
2.23e-139	-0.432089	0.341	0.622	3.6e-135	1	Lgals3bp
2.98e-139	-0.42414	0.581	0.813	4.81e-135	1	Cndp2
3.98e-139	-0.401547	0.284	0.561	6.44e-135	1	Got1
2.1e-138	-0.282809	1	1	3.4e-134	1	mt-Nd4
3.39e-138	-0.402276	0.419	0.699	5.47e-134	1	Commd9
4.61e-138	-0.391277	0.999	0.999	7.44e-134	1	Cd9
5.47e-138	-0.536301	0.902	0.929	8.84e-134	1	Eno1
1.84e-136	0.533303	0.711	0.578	2.98e-132	1	Hexim1
4.69e-136	0.423299	0.953	0.887	7.58e-132	1	Wsb1
2.95e-135	0.337141	1	0.993	4.76e-131	1	Ckb
1.37e-134	-0.57387	0.117	0.35	2.21e-130	1	Sdc4
4e-134	-0.374378	0.977	0.983	6.47e-130	1	Gusb
4.65e-133	-0.318916	0.999	0.998	7.52e-129	1	Fcrls
1.16e-132	-0.390966	0.406	0.68	1.87e-128	1	Echs1
5.75e-131	-0.399309	0.496	0.747	9.29e-127	1	Tmem160
1.36e-129	-0.511007	0.634	0.804	2.2e-125	1	Cstb
1.45e-129	-0.450342	0.256	0.51	2.35e-125	1	Arl5c
1.34e-128	0.489251	0.747	0.625	2.17e-124	1	P2ry13
4.38e-128	-0.390601	0.207	0.456	7.08e-124	1	Rap2b
4.63e-128	-0.530396	0.086	0.302	7.49e-124	1	Csf1
6.75e-128	-0.387632	0.209	0.457	1.09e-123	1	Mitf
6.3e-127	0.43281	0.847	0.769	1.02e-122	1	Nrip1
3.82e-126	-0.38378	0.305	0.57	6.17e-122	1	Axl
3.82e-125	0.405055	0.988	0.956	6.17e-121	1	Hnrnpa2b1
6.19e-125	-0.373939	0.11	0.33	1e-120	1	Myo1e
2.25e-124	-0.345957	0.115	0.339	3.63e-120	1	Myo5a
2.6e-123	-0.4093	0.618	0.809	4.2e-119	1	Tmem256
3.57e-123	-0.509839	0.261	0.504	5.77e-119	1	Bnip3
3.62e-123	-0.396562	0.412	0.673	5.85e-119	1	P2rx4
9.57e-123	-0.484397	0.21	0.458	1.55e-118	1	Hist1h2bc
3.19e-122	0.615322	0.67	0.504	5.15e-118	1	Ccl12
3.34e-122	0.373229	0.962	0.906	5.39e-118	1	F11r
5.37e-122	-0.345963	0.117	0.338	8.67e-118	1	H2-Ab1
2.76e-121	-0.368344	0.316	0.575	4.46e-117	1	Arl11
1.48e-120	-0.384718	0.218	0.468	2.39e-116	1	Gla
3.14e-120	-0.368207	0.47	0.729	5.08e-116	1	Plbd2
4.38e-120	-1.02029	0.891	0.869	7.07e-116	1	Ccl3
5.51e-120	-0.337019	0.142	0.37	8.89e-116	1	Epb41l3
1.83e-119	-0.342119	0.249	0.501	2.96e-115	1	Acaa2
2.98e-119	0.397386	0.964	0.893	4.81e-115	1	Mat2a
5.27e-119	0.374653	0.935	0.865	8.51e-115	1	Cmtm7
6.25e-119	-0.376852	0.223	0.471	1.01e-114	1	Ramp1
7.07e-119	-0.374782	0.328	0.588	1.14e-114	1	Atp6v1a
2.73e-118	0.262233	1	1	4.41e-114	1	Eif1
5.27e-118	-0.38687	0.496	0.738	8.51e-114	1	Atxn10
2.86e-117	-0.385927	0.867	0.928	4.61e-113	1	Gpi1
3.13e-117	-0.416789	0.2	0.438	5.05e-113	1	Crlf2
7.23e-117	-0.474372	0.602	0.787	1.17e-112	1	Aldh2
3.68e-116	-0.38143	0.208	0.443	5.94e-112	1	Slc48a1
3.85e-116	-0.346842	0.31	0.568	6.22e-112	1	Abcd2
8.32e-116	-0.341129	0.292	0.548	1.34e-111	1	Dgkz
1.21e-115	-0.359055	0.045	0.231	1.96e-111	1	Fabp3
1.46e-115	0.462202	0.841	0.697	2.36e-111	1	Gadd45b
8.51e-115	0.434324	0.84	0.761	1.38e-110	1	Brd2
2.74e-114	-0.322417	0.958	0.975	4.43e-110	1	Akr1a1
6.46e-114	0.327869	0.998	0.994	1.04e-109	1	Calm2
7.39e-114	-0.357869	0.103	0.309	1.19e-109	1	Plaur
3.71e-113	-0.651239	0.736	0.82	6e-109	1	Neat1
8.27e-113	-0.361561	0.224	0.461	1.34e-108	1	Glipr1
8.57e-113	-0.393068	0.269	0.51	1.38e-108	1	Fxyd5
9.51e-113	-0.367336	0.422	0.682	1.54e-108	1	Atp6v1b2
4.22e-112	-0.401821	0.507	0.739	6.82e-108	1	Cpd
4.73e-112	-0.286559	0.052	0.236	7.65e-108	1	Rftn1
1.36e-111	0.251962	1	0.999	2.19e-107	1	Marcks
1.36e-111	-0.334405	0.321	0.573	2.2e-107	1	Gsto1
2.04e-111	-0.334308	0.258	0.5	3.3e-107	1	Amdhd2
4.8e-111	-0.371797	0.508	0.742	7.76e-107	1	Atp13a2
6.23e-111	-0.294735	0.999	0.997	1.01e-106	1	Myl6
1.15e-110	-0.334908	0.382	0.641	1.86e-106	1	Rnaseh2c
1.8e-110	-0.409286	0.192	0.42	2.91e-106	1	Pmp22
2.05e-110	0.43572	0.782	0.703	3.32e-106	1	Ivns1abp
1.04e-109	-0.335905	0.341	0.594	1.69e-105	1	Pet100
1.05e-109	-0.42108	0.514	0.739	1.69e-105	1	Slc15a3
1.83e-109	-0.365883	0.82	0.895	2.95e-105	1	Oxct1
5.43e-108	-0.412456	0.37	0.618	8.77e-104	1	Scd2
5.67e-108	-0.377431	0.685	0.844	9.15e-104	1	Uqcr10
6.2e-108	-0.329603	0.382	0.639	1e-103	1	Renbp
6.82e-108	-0.331693	0.074	0.263	1.1e-103	1	Gpr65
1.11e-107	-0.381264	0.208	0.428	1.79e-103	1	Fam162a
1.73e-107	-0.318468	0.201	0.428	2.79e-103	1	1700003F12Rik
2.55e-107	-0.31051	0.333	0.593	4.12e-103	1	Lars2
6.98e-107	-0.321516	0.219	0.451	1.13e-102	1	Apbb2
1.02e-106	-0.302551	0.024	0.185	1.65e-102	1	Chst2
1.86e-106	0.454718	0.775	0.686	3.01e-102	1	Txnip
8.27e-106	0.375395	0.981	0.941	1.34e-101	1	Fus
3.02e-105	-0.284299	0.087	0.279	4.88e-101	1	Sulf2
4.95e-105	-0.367606	0.398	0.645	7.99e-101	1	Eprs
1.64e-104	-0.305365	0.21	0.432	2.65e-100	1	Dpp7
3.36e-104	-0.311776	0.039	0.207	5.43e-100	1	Fam20c
4.67e-104	-0.291792	0.104	0.301	7.54e-100	1	Sh3bgrl
6.4e-104	-0.290099	0.152	0.362	1.03e-99	1	Galns
2.1e-103	0.363599	0.908	0.837	3.39e-99	1	Srgap2
3.6e-103	-0.277941	0.149	0.362	5.81e-99	1	Tex264
3.87e-103	0.469106	0.723	0.627	6.25e-99	1	Dnajb9
3.96e-103	0.372625	0.928	0.843	6.4e-99	1	Ssh2
5.46e-103	-0.325416	0.29	0.524	8.82e-99	1	Ethe1
6.76e-103	-0.304856	0.163	0.374	1.09e-98	1	Mpp1
8.96e-103	-0.3518	0.456	0.704	1.45e-98	1	Akr1b3
4.67e-102	-0.352679	0.506	0.739	7.54e-98	1	Naglu
5.21e-102	-0.309893	0.089	0.276	8.42e-98	1	Adssl1
5.71e-102	-0.304861	0.136	0.339	9.23e-98	1	S100a1
5.84e-102	-0.284426	0.122	0.323	9.43e-98	1	Cpt1a
9.08e-102	-0.48617	0.973	0.974	1.47e-97	1	Prdx1
3.64e-101	0.308045	0.996	0.978	5.88e-97	1	Srrm2
7.33e-101	-0.364305	0.569	0.786	1.18e-96	1	Tspo
7.66e-101	0.413861	0.454	0.276	1.24e-96	1	Slc2a5
9.67e-101	-0.31009	0.276	0.508	1.56e-96	1	Plin3
1.01e-100	0.51215	0.763	0.658	1.64e-96	1	Sox4
1.41e-100	-0.347148	0.587	0.798	2.28e-96	1	Aes
4.36e-100	-0.427668	0.487	0.715	7.04e-96	1	Txn1
5.06e-100	-0.30847	0.29	0.523	8.18e-96	1	Mrpl54
8.54e-100	0.384389	0.831	0.757	1.38e-95	1	Zfp36l2
1.22e-99	0.463674	0.643	0.501	1.97e-95	1	Adrb2
1.28e-99	-0.366565	0.286	0.516	2.07e-95	1	Arid5b
2.32e-99	-0.513053	0.271	0.481	3.75e-95	1	Npl
2.89e-99	-0.34386	0.384	0.626	4.67e-95	1	Soat1
6.08e-99	0.435095	0.695	0.589	9.82e-95	1	Spint1
7.42e-98	-0.360228	0.297	0.529	1.2e-93	1	Cxcl16
1.57e-97	-0.27765	0.126	0.322	2.53e-93	1	Smpdl3a
2.91e-97	-0.304729	0.196	0.407	4.7e-93	1	Maged1
1.11e-96	-0.289823	0.139	0.337	1.8e-92	1	Gstm5
1.59e-96	-0.285907	0.175	0.382	2.57e-92	1	Galk1
2.75e-96	-0.297951	0.95	0.965	4.45e-92	1	Gpx4
5.02e-96	-0.305415	0.401	0.645	8.11e-92	1	Napa
6.16e-96	-0.32827	0.785	0.889	9.95e-92	1	Scarb2
1.74e-95	-0.344889	0.579	0.784	2.81e-91	1	Plgrkt
1.85e-95	-0.344777	0.522	0.747	3e-91	1	Prelid1
5.89e-95	-0.304378	0.377	0.613	9.51e-91	1	Ndufs6
1.74e-94	-0.322811	0.756	0.879	2.82e-90	1	Glmp
2.06e-94	-0.284798	0.315	0.549	3.33e-90	1	Mien1
3.44e-94	-0.576337	0.841	0.871	5.56e-90	1	Tpi1
3.83e-94	-0.326024	0.48	0.718	6.18e-90	1	Bola2
5.43e-94	-0.3149	0.921	0.948	8.78e-90	1	Sdcbp
5.46e-94	-0.29938	0.347	0.582	8.82e-90	1	Ndufb2
1.61e-93	0.443659	0.749	0.659	2.59e-89	1	Sertad1
2.76e-93	-0.316185	0.981	0.985	4.45e-89	1	Bsg
6.43e-93	-0.3022	0.389	0.623	1.04e-88	1	Dpm3
1.63e-92	0.484741	0.67	0.557	2.63e-88	1	Ints6
1.93e-92	0.351414	0.889	0.828	3.12e-88	1	Jpt1
1.94e-92	-0.308294	0.293	0.515	3.14e-88	1	Gng12
2.72e-92	-0.31451	0.539	0.766	4.39e-88	1	Nucb1
4.9e-92	-0.312488	0.428	0.666	7.92e-88	1	Tspan4
6.43e-92	0.296086	1	0.992	1.04e-87	1	Junb
1.58e-91	-0.259499	0.116	0.301	2.55e-87	1	Anxa4
1.79e-91	-0.360092	0.589	0.775	2.89e-87	1	Atp5k
1.94e-91	-0.280616	0.273	0.491	3.13e-87	1	Tmem9b
2.27e-91	-0.29748	0.959	0.968	3.67e-87	1	Itm2c
3.02e-90	-1.36111	0.899	0.819	4.88e-86	1	Ccl4
1.46e-89	-0.278508	0.939	0.957	2.35e-85	1	Ubl5
1.85e-89	-0.313402	0.374	0.61	2.99e-85	1	Slc43a2
1.31e-88	-0.29992	0.862	0.922	2.11e-84	1	Tpd52
1.39e-88	-0.339313	0.688	0.837	2.25e-84	1	Selenow
5.53e-88	-0.315386	0.158	0.346	8.93e-84	1	Gpx3
8.18e-88	-0.283303	0.338	0.563	1.32e-83	1	Cops6
9.54e-88	-0.266703	0.145	0.334	1.54e-83	1	Htatip2
1.1e-87	-0.307255	0.504	0.731	1.78e-83	1	Ndufa3
1.73e-87	-0.27259	0.209	0.413	2.79e-83	1	Sord
2.3e-87	-0.277263	0.284	0.511	3.72e-83	1	AU020206
2.47e-87	-0.330909	0.373	0.603	3.99e-83	1	Hif1a
3.92e-87	-0.29367	0.449	0.693	6.33e-83	1	Etfb
7.71e-87	0.336385	0.827	0.772	1.25e-82	1	Ube2s
8.47e-87	-0.347005	0.656	0.814	1.37e-82	1	Calm3
1.5e-86	0.340473	0.834	0.778	2.43e-82	1	Fgd2
1.87e-86	-0.267288	0.227	0.437	3.02e-82	1	Rassf3
4.44e-86	-0.268999	0.272	0.489	7.17e-82	1	Rab11fip5
5.52e-86	0.405765	0.468	0.312	8.91e-82	1	Tob1
8.84e-86	-0.266213	0.271	0.488	1.43e-81	1	Gba
9.39e-86	-0.265415	0.999	0.999	1.52e-81	1	Gm42418
1.18e-85	0.334599	0.96	0.915	1.9e-81	1	Dnaja1
1.18e-85	-0.268497	0.335	0.562	1.9e-81	1	Ndufv2
1.32e-85	-0.329687	0.343	0.562	2.14e-81	1	Pfkl
1.65e-85	0.479233	0.69	0.563	2.67e-81	1	Klf4
2.55e-85	-0.278438	0.336	0.561	4.12e-81	1	Ndufa5
2.77e-85	-0.370448	0.183	0.37	4.47e-81	1	Capg
3.64e-85	0.40448	0.639	0.525	5.88e-81	1	Adgrg1
4.03e-85	-0.314762	0.178	0.368	6.5e-81	1	Tecpr1
4.11e-85	-0.326821	0.501	0.714	6.63e-81	1	Ndufc1
8.82e-85	0.292984	0.98	0.949	1.43e-80	1	Btg1
1.05e-84	-0.26449	0.322	0.545	1.69e-80	1	Tmem147
2.63e-84	0.348307	0.987	0.959	4.25e-80	1	Mylip
7.25e-84	0.353957	0.91	0.848	1.17e-79	1	Sfpq
1.05e-83	-0.263963	0.081	0.242	1.7e-79	1	Gsn
1.11e-83	-0.359997	0.538	0.736	1.8e-79	1	Aplp2
2.44e-83	-0.31367	0.811	0.897	3.94e-79	1	Uqcr11
2.92e-83	-0.268865	0.131	0.31	4.72e-79	1	Pgm2
3.98e-83	-0.280888	0.364	0.589	6.43e-79	1	Fundc2
6.27e-83	-0.27971	0.275	0.49	1.01e-78	1	Wwp2
2.4e-82	-0.265779	0.275	0.486	3.87e-78	1	Cenpb
2.74e-82	0.372144	0.83	0.773	4.43e-78	1	Tubb2a
4.38e-82	-0.261791	0.16	0.346	7.07e-78	1	C1galt1c1
5.66e-82	0.366913	0.799	0.715	9.14e-78	1	Sgk1
7.14e-82	0.326466	0.878	0.789	1.15e-77	1	Lst1
1e-81	-0.268149	0.358	0.584	1.62e-77	1	Hcfc1r1
5.06e-81	-0.272211	0.262	0.468	8.17e-77	1	Slc37a2
6.98e-81	-0.295697	0.111	0.279	1.13e-76	1	Serpinb6a
1.02e-80	-0.399985	0.362	0.569	1.65e-76	1	Slc16a3
1.39e-80	0.329951	0.866	0.803	2.25e-76	1	Tanc2
4.46e-80	-0.306898	0.706	0.85	7.21e-76	1	Bag1
1.73e-79	-0.279446	0.456	0.683	2.79e-75	1	Sgpl1
2.91e-79	-0.255165	0.278	0.486	4.71e-75	1	Ndufb6
7.35e-79	-0.260161	0.991	0.988	1.19e-74	1	mt-Nd5
9.88e-79	-0.260587	0.293	0.5	1.6e-74	1	Dap
1.22e-78	0.316666	0.926	0.883	1.97e-74	1	Ptprc
1.24e-78	-0.290392	0.487	0.71	2.01e-74	1	Man1c1
1.27e-78	-0.304593	0.601	0.784	2.06e-74	1	Timm13
1.31e-78	-0.31315	0.618	0.793	2.12e-74	1	mt-Atp8
1.43e-78	-0.320355	0.299	0.502	2.31e-74	1	Ifi27
2.19e-78	0.272562	0.994	0.974	3.54e-74	1	Ifngr1
6.33e-78	-0.252855	0.21	0.398	1.02e-73	1	Smim4
2.53e-77	-0.285501	0.536	0.743	4.09e-73	1	Txndc17
3.12e-77	-0.315242	0.719	0.848	5.03e-73	1	Ndufb8
5.07e-77	-0.269733	0.395	0.614	8.2e-73	1	Shisa5
5.13e-77	-0.265412	0.14	0.312	8.29e-73	1	Nab2
7.55e-77	-0.25005	0.193	0.384	1.22e-72	1	Sdc3
8.53e-77	-0.457368	0.901	0.906	1.38e-72	1	Ldha
2.69e-76	-0.278124	0.507	0.725	4.35e-72	1	Sdhb
6.39e-76	-0.311168	0.196	0.379	1.03e-71	1	Rilpl2
7.5e-76	-0.292626	0.551	0.75	1.21e-71	1	Romo1
5.03e-75	0.314583	0.892	0.847	8.12e-71	1	Pnp
8.06e-75	-0.268297	0.922	0.946	1.3e-70	1	Tpp1
1.13e-74	0.376732	0.463	0.317	1.82e-70	1	Rapgef5
1.18e-74	-0.268279	0.318	0.522	1.9e-70	1	Il11ra1
2.25e-74	-0.267255	0.416	0.631	3.64e-70	1	1810058I24Rik
3.38e-74	-0.269001	0.402	0.616	5.46e-70	1	Ndufa12
4.33e-74	0.315001	0.907	0.851	6.99e-70	1	Atf4
5.75e-74	0.344911	0.801	0.744	9.28e-70	1	Ntpcr
6.58e-74	-0.323045	0.651	0.811	1.06e-69	1	Aprt
1.08e-73	-0.2949	0.643	0.813	1.75e-69	1	Ndufv3
1.14e-73	-0.379664	0.07	0.213	1.84e-69	1	Ccrl2
1.62e-73	-0.251597	0.327	0.534	2.62e-69	1	Spg21
6.84e-73	-0.26148	0.447	0.664	1.11e-68	1	Commd4
1.26e-72	-0.250994	0.38	0.599	2.03e-68	1	S100a13
1.43e-72	-0.33181	0.448	0.646	2.31e-68	1	Prdx4
1.46e-72	-0.270354	0.283	0.479	2.36e-68	1	Eif1a
2.79e-72	-0.250951	0.13	0.294	4.51e-68	1	Fnip2
3.13e-72	-0.370653	0.127	0.286	5.06e-68	1	Hist1h1c
4.68e-72	-0.254593	0.426	0.642	7.56e-68	1	Mrpl34
5.05e-72	-0.276555	0.3	0.5	8.16e-68	1	Nrp2
6.97e-72	-0.252515	0.969	0.968	1.13e-67	1	Cox6c
7.35e-72	-0.294858	0.596	0.774	1.19e-67	1	Atp5o.1
1.52e-71	0.357831	0.708	0.635	2.46e-67	1	Dock10
1.69e-71	-0.277	0.339	0.541	2.73e-67	1	Tpm4
3.43e-71	-0.276693	0.539	0.745	5.55e-67	1	Cenpx
7.25e-71	-0.298995	0.556	0.751	1.17e-66	1	Gde1
1.23e-70	-0.255879	0.314	0.513	2e-66	1	Naa50
1.32e-70	-0.26982	0.532	0.739	2.13e-66	1	Fam173a
1.71e-70	0.325583	0.806	0.763	2.77e-66	1	Pde3b
2.63e-70	0.284539	0.95	0.913	4.25e-66	1	Mef2a
1.55e-69	-0.259741	0.407	0.62	2.5e-65	1	Psmd2
2.09e-69	0.316207	0.832	0.755	3.38e-65	1	Rnase4
3.26e-69	-0.252273	0.41	0.627	5.26e-65	1	Pigt
1.93e-68	0.295633	0.987	0.965	3.12e-64	1	Hsp90aa1
2.95e-68	-0.267347	0.877	0.916	4.76e-64	1	Elob
3.18e-68	0.431103	0.689	0.616	5.14e-64	1	Snhg12
3.28e-68	-0.30887	0.574	0.746	5.3e-64	1	Gm10076
4.84e-68	-0.272151	0.217	0.402	7.82e-64	1	Itgax
2.69e-67	0.25011	0.996	0.987	4.34e-63	1	Epb41l2
2.7e-67	-0.261985	0.498	0.706	4.36e-63	1	Gltp
4.13e-67	-0.289986	0.443	0.65	6.67e-63	1	Cebpa
4.14e-67	-0.251367	0.459	0.669	6.68e-63	1	Mrps21
8.15e-67	0.55189	0.393	0.257	1.32e-62	1	Hspa1a
1.17e-66	-0.309421	0.842	0.896	1.9e-62	1	C3ar1
1.43e-66	-0.265639	0.976	0.975	2.32e-62	1	mt-Nd4l
1.5e-66	-0.263487	0.539	0.744	2.43e-62	1	Cuedc2
1.53e-66	-0.252236	0.9	0.936	2.48e-62	1	Arhgdia
1.65e-66	-0.33657	0.067	0.198	2.67e-62	1	Cenpa
3.91e-66	-0.251622	0.868	0.913	6.31e-62	1	Ndufa2
4.55e-66	0.300347	0.957	0.879	7.36e-62	1	Icam1
9.58e-66	0.296804	0.326	0.19	1.55e-61	1	Ddit4
1.37e-65	0.307851	0.865	0.8	2.21e-61	1	Slc38a2
1.74e-65	-0.313725	0.619	0.777	2.81e-61	1	Csf2ra
1.96e-65	-0.261704	0.378	0.577	3.17e-61	1	Mapkapk2
3.08e-65	0.305417	0.892	0.834	4.97e-61	1	Ppfia4
3.74e-65	-0.320297	0.366	0.565	6.03e-61	1	Selenoh
1.56e-64	-0.257079	0.467	0.674	2.52e-60	1	Ggh
2.87e-64	-0.28487	0.201	0.369	4.63e-60	1	Nfkbid
3.93e-64	-0.260359	0.452	0.655	6.35e-60	1	Nudc
6.59e-64	-0.280145	0.63	0.789	1.07e-59	1	Tmed3
1.24e-63	-0.270335	0.57	0.754	2e-59	1	Chmp2a
9.06e-63	0.273262	0.303	0.173	1.46e-58	1	Rtn1
1.18e-62	0.28341	0.868	0.811	1.91e-58	1	Frmd4a
2.96e-62	0.275675	0.988	0.959	4.78e-58	1	Pou2f2
4.07e-62	-0.276516	0.738	0.845	6.58e-58	1	Atp1b3
8.31e-62	-0.268741	0.644	0.803	1.34e-57	1	Psmb4
8.46e-62	0.358643	0.554	0.441	1.37e-57	1	Nabp1
1.02e-61	0.270942	0.906	0.863	1.65e-57	1	Bmp2k
1.13e-61	-0.259371	0.189	0.352	1.83e-57	1	Tnfaip2
1.4e-61	-0.253832	0.622	0.795	2.26e-57	1	Sin3b
2.33e-61	-0.264204	0.685	0.832	3.76e-57	1	1110008F13Rik
1.49e-60	-0.286871	0.129	0.273	2.41e-56	1	Tnfaip3
1.1e-59	0.288019	0.66	0.56	1.78e-55	1	Il1a
1.37e-59	-0.273861	0.33	0.506	2.22e-55	1	Egln1
7.96e-59	0.289865	0.797	0.744	1.29e-54	1	Smad7
8.27e-59	-0.265863	0.483	0.679	1.34e-54	1	Tceal9
1.06e-58	-0.269671	0.567	0.743	1.71e-54	1	Vps29
1.61e-58	0.302653	0.379	0.247	2.61e-54	1	Clec4a2
2.27e-58	-0.250158	0.843	0.906	3.67e-54	1	Uqcrq
2.46e-58	-0.256763	0.719	0.846	3.97e-54	1	Ube2l3
3.19e-58	-1.23764	0.026	0.126	5.15e-54	1	Cxcl2
7.57e-58	-0.250411	0.58	0.759	1.22e-53	1	Cope
1.08e-57	0.259832	0.955	0.925	1.75e-53	1	Vsir
4.05e-57	-0.253658	0.694	0.832	6.55e-53	1	Cox6a1
6.55e-57	0.347624	0.588	0.491	1.06e-52	1	St3gal6
1.07e-56	0.314426	0.709	0.666	1.72e-52	1	Commd8
1.31e-56	-0.363485	0.555	0.707	2.12e-52	1	Gatm
5.25e-56	-0.284467	0.586	0.746	8.47e-52	1	Nme1
2.16e-55	-0.395336	0.348	0.512	3.49e-51	1	Ccl9
2.63e-55	0.269731	0.849	0.824	4.24e-51	1	Sft2d1
1.44e-53	-0.30985	0.346	0.519	2.33e-49	1	Slc40a1
1.84e-53	-0.361782	0.633	0.764	2.97e-49	1	Blvrb
2.77e-53	-0.282402	0.193	0.341	4.47e-49	1	Slfn2
4.78e-53	-0.290859	0.992	0.988	7.72e-49	1	H2-D1
2.19e-52	-0.283076	0.443	0.634	3.53e-48	1	Nucks1
4.87e-52	-0.352878	0.095	0.216	7.87e-48	1	Smc2
8.81e-52	-0.250867	0.551	0.724	1.42e-47	1	Dnajb14
1.17e-51	-0.259936	0.264	0.425	1.89e-47	1	Txnrd1
1.42e-51	0.25919	0.858	0.819	2.3e-47	1	Celf2
6.15e-51	0.250841	0.942	0.905	9.93e-47	1	Srsf5
2.31e-50	-0.260896	0.144	0.274	3.74e-46	1	Tagln2
5.02e-50	0.312638	0.745	0.639	8.11e-46	1	Crybb1
2.6e-49	0.325857	0.704	0.668	4.21e-45	1	Gls
8.05e-49	-0.255483	0.919	0.936	1.3e-44	1	Slc3a2
3.32e-48	0.289202	0.844	0.802	5.36e-44	1	Rbbp6
4.58e-48	0.250228	0.82	0.79	7.4e-44	1	Itga6
1.05e-47	0.253668	0.82	0.778	1.69e-43	1	Cttnbp2nl
3.68e-47	-0.304175	0.454	0.614	5.95e-43	1	Tlr2
7.03e-47	-0.884909	0.093	0.204	1.14e-42	1	Il1b
6.72e-46	-0.785235	0.029	0.114	1.09e-41	1	Cxcl10
1.49e-45	0.310596	0.559	0.483	2.41e-41	1	Fbrsl1
4.63e-44	0.335344	0.573	0.505	7.49e-40	1	Fchsd2
1.78e-43	0.281062	0.684	0.643	2.87e-39	1	Tm6sf1
4.1e-43	0.287528	0.732	0.715	6.62e-39	1	Eif4a2
7.69e-43	-0.26118	0.092	0.199	1.24e-38	1	Vim
1.42e-42	0.300804	0.65	0.611	2.29e-38	1	Mgat4a
1.55e-42	0.304074	0.629	0.569	2.51e-38	1	Camk2n1
6.91e-42	-0.259481	0.521	0.685	1.12e-37	1	Anp32b
1.03e-41	0.285096	0.658	0.605	1.67e-37	1	Srsf7
3.02e-41	-0.265509	0.088	0.191	4.88e-37	1	Egr3
9.86e-41	0.286482	0.722	0.69	1.59e-36	1	Nufip2
1.24e-40	0.259428	0.346	0.242	2e-36	1	Arl4d
9.51e-40	-0.39336	0.214	0.346	1.54e-35	1	Gclm
1.25e-39	0.301198	0.456	0.363	2.02e-35	1	Errfi1
1.26e-39	0.31139	0.627	0.585	2.03e-35	1	Ubash3b
1.2e-37	-1.08526	0.682	0.774	1.93e-33	1	Hmox1
1.63e-37	0.265258	0.742	0.724	2.64e-33	1	Slc16a6
6.26e-36	-0.26115	0.172	0.285	1.01e-31	1	Nr4a1
5e-34	0.253432	0.689	0.678	8.08e-30	1	Arid1a
2.55e-32	-0.572259	0.428	0.563	4.11e-28	1	Stmn1
6e-32	0.284674	0.472	0.386	9.69e-28	1	Socs3
2.43e-31	0.259506	0.673	0.661	3.92e-27	1	Morc3
8.78e-31	0.28843	0.474	0.397	1.42e-26	1	Fbxl18
3.34e-30	-0.258128	0.093	0.177	5.39e-26	1	Smc4
8.99e-30	0.303754	0.603	0.561	1.45e-25	1	Tuba1a
1.16e-29	0.256511	0.637	0.621	1.88e-25	1	Il10ra
1.49e-29	-0.275727	0.989	0.973	2.41e-25	1	Calr
7.72e-29	0.26205	0.552	0.501	1.25e-24	1	Elmo1
4.55e-28	0.276077	0.564	0.524	7.35e-24	1	Herpud1
4.38e-27	-0.334864	0.936	0.914	7.07e-23	1	Uba52
4.94e-26	-0.288793	0.753	0.795	7.98e-22	1	Emp3
5.66e-26	-0.341515	1	1	9.14e-22	1	Fth1
5.25e-24	0.2555	0.499	0.452	8.49e-20	1	Lyl1
4.18e-23	0.25432	0.596	0.586	6.75e-19	1	Pik3r1
3.99e-22	0.309187	0.312	0.24	6.44e-18	1	Hes1
4.15e-22	0.316748	0.357	0.286	6.71e-18	1	Ccl2
7.2e-22	-0.372719	0.053	0.111	1.16e-17	1	Hist1h2ap
7.01e-20	-0.269555	0.548	0.643	1.13e-15	1	Fosb
6.6e-18	-0.267365	0.319	0.409	1.07e-13	1	Rgs1
6.07e-11	-0.331842	0.264	0.331	9.81e-07	1	Cdkn1a
1.25e-06	-0.254878	0.995	0.992	0.0201996	1	H2afz
0	2.0751	0.984	0.815	0	2	Ccl4
0	1.49267	0.983	0.858	0	2	Ccl3
1.79e-303	1.28175	0.963	0.841	2.88e-299	2	Atf3
4.62e-243	0.514707	1	1	7.47e-239	2	Ubc
1.54e-230	0.732212	0.998	0.963	2.49e-226	2	Rhob
6.79e-212	0.949894	0.936	0.782	1.1e-207	2	Neat1
6.93e-208	0.948765	0.98	0.936	1.12e-203	2	Klf2
3.58e-192	0.624684	0.985	0.941	5.79e-188	2	Zfand5
7.47e-190	0.656886	0.985	0.935	1.21e-185	2	Ier2
3.41e-164	0.363573	1	1	5.51e-160	2	Actg1
4.45e-155	0.539856	1	0.993	7.2e-151	2	Junb
7.19e-155	0.515764	0.994	0.97	1.16e-150	2	Ier5
5.65e-147	0.673648	0.954	0.852	9.12e-143	2	Klf6
2.78e-134	0.443672	0.994	0.984	4.49e-130	2	Mcl1
9.78e-133	0.308314	1	1	1.58e-128	2	Eif1
8.67e-123	0.669754	0.858	0.692	1.4e-118	2	Cd83
9.92e-123	0.622549	0.804	0.595	1.6e-118	2	Ddit3
6.02e-113	0.446712	0.981	0.936	9.72e-109	2	Ccnl1
1.6e-110	0.517885	0.909	0.804	2.59e-106	2	Jmjd1c
1.36e-109	-0.263685	1	1	2.19e-105	2	Rpl41
2.91e-109	-0.280229	1	1	4.69e-105	2	Tmsb4x
3.2e-107	0.4908	0.942	0.835	5.17e-103	2	Zfp36
3.27e-107	0.555108	0.761	0.536	5.28e-103	2	Ifrd1
3.55e-107	0.964703	0.576	0.361	5.73e-103	2	Rgs1
9.43e-107	-0.36386	0.999	1	1.52e-102	2	Rps28
5.67e-104	-0.289344	1	1	9.15e-100	2	Rpl38
8.73e-102	0.489524	0.8	0.602	1.41e-97	2	Tgif1
2.19e-99	0.494448	0.988	0.968	3.53e-95	2	Btg2
1.06e-96	-0.265979	1	1	1.72e-92	2	Rpl39
6.45e-94	0.465374	0.877	0.769	1.04e-89	2	Nfe2l2
9.8e-92	0.648285	0.985	0.949	1.58e-87	2	Fos
2.28e-88	0.571698	0.991	0.972	3.68e-84	2	Jun
2.8e-88	0.433117	0.957	0.893	4.53e-84	2	Wsb1
1.25e-80	0.449343	0.806	0.636	2.01e-76	2	Tsc22d2
2.79e-79	-0.329153	0.969	0.99	4.52e-75	2	Atp5e
7.51e-77	0.353825	0.997	0.987	1.21e-72	2	Egr1
2.61e-76	-0.340547	0.934	0.973	4.22e-72	2	Cox6c
9.46e-75	0.269631	1	0.999	1.53e-70	2	Ddx5
1.66e-68	-0.309791	0.938	0.979	2.69e-64	2	Cox7c
1.81e-67	0.374605	0.943	0.904	2.93e-63	2	Mat2a
1.22e-65	-0.33788	0.903	0.962	1.98e-61	2	Atpif1
3.24e-65	-0.395239	0.999	0.997	5.23e-61	2	Cx3cr1
2.24e-63	0.432866	0.985	0.968	3.62e-59	2	Ier3
2.72e-63	-0.355941	0.604	0.762	4.39e-59	2	Tomm7
3.06e-63	0.329739	0.963	0.911	4.94e-59	2	Skil
7.73e-61	0.343662	0.958	0.928	1.25e-56	2	Slc3a2
8.91e-61	0.340143	0.926	0.873	1.44e-56	2	Purb
2.38e-59	-0.253514	0.996	0.999	3.84e-55	2	Rps17
6.62e-58	0.401298	0.994	0.982	1.07e-53	2	Jund
1.4e-57	0.317819	0.928	0.853	2.27e-53	2	Atf4
1.62e-57	-0.320206	0.706	0.833	2.62e-53	2	2010107E04Rik
1.7e-56	0.56064	0.664	0.511	2.74e-52	2	Dusp2
5.86e-55	0.469423	0.897	0.821	9.47e-51	2	Dusp1
1.47e-53	-0.349728	0.614	0.752	2.38e-49	2	Atp5k
2.41e-53	0.47243	0.705	0.563	3.89e-49	2	Il1a
1.16e-52	-0.330227	0.712	0.824	1.88e-48	2	Uqcr10
1.39e-52	-0.342928	0.613	0.753	2.25e-48	2	Rps27l
3.09e-52	-0.286523	0.872	0.934	5e-48	2	Atp5j
4.55e-52	-0.333129	0.653	0.784	7.35e-48	2	Tmem256
6.51e-52	-0.284669	0.889	0.947	1.05e-47	2	Atp5j2
1.18e-51	0.262385	0.998	0.991	1.91e-47	2	Rsrp1
5.9e-51	0.25522	0.393	0.232	9.52e-47	2	Plk3
4.12e-50	0.276016	0.99	0.974	6.65e-46	2	Eif5
1.59e-49	-0.301835	0.838	0.918	2.57e-45	2	Elob
1.38e-48	0.351053	0.812	0.71	2.22e-44	2	Sqstm1
1.79e-48	0.308051	0.632	0.475	2.89e-44	2	Ndel1
5.57e-48	-1.27802	0.375	0.532	8.99e-44	2	Ftl1-ps1
5.93e-48	-0.288758	0.785	0.895	9.59e-44	2	Sem1
7.13e-48	-0.274922	0.825	0.915	1.15e-43	2	Ndufa2
7.42e-48	-0.290613	0.802	0.889	1.2e-43	2	Uqcr11
8.31e-48	-0.331824	0.996	0.997	1.34e-43	2	mt-Nd3
6.49e-47	-0.31993	0.544	0.686	1.05e-42	2	Ndufc1
1.25e-46	0.27829	0.96	0.928	2.02e-42	2	Pnrc1
1.28e-46	0.354482	0.775	0.665	2.07e-42	2	Sertad1
5.02e-46	0.336358	0.392	0.241	8.11e-42	2	Nr4a1
4.83e-45	0.296536	0.661	0.497	7.8e-41	2	Kdm6b
5.62e-45	-0.27106	0.875	0.937	9.09e-41	2	Sec61g
1.15e-44	0.359664	0.721	0.598	1.86e-40	2	Tsc22d3
1.51e-44	0.304542	0.887	0.808	2.45e-40	2	Tra2a
2.17e-43	-0.258089	0.973	0.986	3.5e-39	2	Ybx1
3.26e-43	0.336975	0.951	0.921	5.27e-39	2	Dnaja1
4.68e-43	0.327521	0.827	0.733	7.56e-39	2	Nfic
1.56e-42	-0.282248	0.771	0.858	2.51e-38	2	Cox7b
1e-41	-0.265129	0.997	0.997	1.62e-37	2	Cd52
1.59e-41	-0.2909	0.816	0.896	2.57e-37	2	Ndufa4
2.21e-40	0.265306	0.943	0.895	3.57e-36	2	Ppp1r10
3.86e-39	0.324855	0.272	0.153	6.24e-35	2	Egr3
5.12e-39	0.300184	0.524	0.385	8.27e-35	2	Egr2
5.45e-39	0.28531	0.873	0.806	8.8e-35	2	Slc38a2
1.69e-38	-0.273145	0.739	0.839	2.73e-34	2	Lrp1
1.88e-38	0.30045	0.699	0.563	3.04e-34	2	Tob2
2.6e-38	-0.250926	0.836	0.901	4.2e-34	2	Uqcrq
4.56e-38	-0.250543	0.793	0.873	7.36e-34	2	Cox7a2
1.18e-37	-0.260968	0.681	0.777	1.9e-33	2	Ndufb7
1.25e-37	-0.254125	0.823	0.895	2.02e-33	2	Tma7
3.49e-37	0.282708	0.646	0.512	5.63e-33	2	Sde2
7.38e-37	0.27189	0.507	0.37	1.19e-32	2	Plekho2
1.28e-36	-0.252319	0.875	0.935	2.06e-32	2	Sec61b
3.55e-36	0.289955	0.904	0.871	5.73e-32	2	Arhgap17
6.15e-36	0.262758	0.478	0.345	9.93e-32	2	Mob3c
1.28e-35	0.251363	0.543	0.403	2.07e-31	2	Jmjd6
2.22e-34	-0.26224	0.396	0.528	3.58e-30	2	Ndufa5
8.27e-34	-0.252626	0.873	0.922	1.34e-29	2	Atp5g1
9.4e-34	0.268502	0.549	0.419	1.52e-29	2	Kansl1l
1.74e-33	0.279556	0.705	0.59	2.81e-29	2	Cebpa
2.88e-33	-0.255875	0.333	0.472	4.65e-29	2	Snrpf
3.71e-33	-0.372316	0.642	0.742	6e-29	2	Gadd45b
1.05e-32	0.295761	0.739	0.629	1.69e-28	2	Rel
3e-32	-0.293076	0.951	0.972	4.85e-28	2	Hmgb1
1.24e-31	0.250227	0.75	0.641	2e-27	2	Cd33
2.04e-30	-0.340417	0.58	0.677	3.3e-26	2	Txn1
3.28e-29	0.270963	0.44	0.316	5.3e-25	2	Nfkbid
3.98e-29	0.349105	0.739	0.649	6.43e-25	2	Gm26532
5.02e-29	-0.417072	0.9	0.931	8.1e-25	2	Mif
1.29e-28	0.271092	0.745	0.656	2.08e-24	2	Peli1
2.09e-28	0.297406	0.755	0.68	3.37e-24	2	Slc15a3
6.49e-28	-0.345125	0.331	0.451	1.05e-23	2	Npl
1.47e-27	-0.256596	0.743	0.824	2.37e-23	2	Hmgn1
9.36e-27	-0.528981	0.718	0.803	1.51e-22	2	Lpl
1.71e-26	-0.301566	0.586	0.687	2.76e-22	2	Gatm
2.57e-26	0.268849	0.806	0.748	4.16e-22	2	Smad7
2.7e-26	-0.301519	0.485	0.582	4.36e-22	2	Ranbp1
1.01e-25	0.262646	0.796	0.721	1.63e-21	2	Zcchc6
1.43e-23	-0.273241	0.567	0.661	2.3e-19	2	Anp32b
7.83e-23	-1.59415	0.187	0.285	1.27e-18	2	Spp1
1.75e-22	-0.646442	0.601	0.684	2.83e-18	2	Fabp5
5.9e-22	0.2789	0.579	0.484	9.53e-18	2	Pdgfb
6.78e-22	-0.254052	0.97	0.975	1.1e-17	2	Aldoa
2.01e-21	-0.32174	0.83	0.87	3.24e-17	2	Tpi1
2.48e-21	-0.297189	0.662	0.746	4e-17	2	Blvrb
3.78e-20	0.292943	0.767	0.705	6.1e-16	2	Neurl3
7.53e-20	-0.272621	0.84	0.882	1.22e-15	2	Pgam1
1.15e-19	-0.257366	0.549	0.628	1.85e-15	2	Gm1673
1.97e-19	-0.488676	0.164	0.254	3.18e-15	2	Lgals3
2.08e-19	-0.308132	0.098	0.183	3.36e-15	2	Ifi27l2a
2.46e-19	-0.275678	0.747	0.807	3.98e-15	2	Pgk1
9.89e-19	0.292962	0.661	0.58	1.6e-14	2	Klf4
4.06e-17	-0.337398	0.177	0.261	6.55e-13	2	Lgals1
7.46e-17	-0.344952	0.453	0.529	1.21e-12	2	Igf1
6.89e-16	-0.297011	0.978	0.987	1.11e-11	2	Pkm
2.81e-15	0.427847	0.62	0.578	4.54e-11	2	Id2
6.03e-15	-0.335052	0.641	0.703	9.74e-11	2	Hmgb2
2.06e-14	0.259966	0.427	0.347	3.33e-10	2	Rrad
2.88e-09	-0.262925	0.143	0.196	4.65e-05	2	Smc2
5.85e-09	-0.309874	1	1	9.45e-05	2	Fth1
1.76e-07	-0.318623	0.272	0.324	0.00284447	2	Gclm
1.87e-07	-0.544391	0.775	0.751	0.00301714	2	Hmox1
7.18e-07	-0.930069	0.074	0.109	0.0115934	2	Cxcl2
0.000115	-0.484447	0.502	0.535	1	2	Apoc1
0.00019	-0.474027	0.531	0.534	1	2	Stmn1
0	1.50123	0.952	0.39	0	3	Npl
0	1.338	1	0.912	0	3	Uba52
0	1.04497	1	0.998	0	3	Lyz2
0	0.997129	1	0.999	0	3	Selenop
6.95e-272	0.902919	0.995	0.942	1.12e-267	3	Lag3
7.27e-265	0.666307	0.5	0.119	1.17e-260	3	Chst2
1.81e-259	0.496182	1	1	2.92e-255	3	Itm2b
5.36e-243	0.70083	1	1	8.66e-239	3	Apoe
2.31e-233	-1.40146	0.215	0.71	3.73e-229	3	Tmem119
1.94e-226	0.875541	0.998	0.988	3.14e-222	3	H2-D1
7.32e-225	0.767148	0.963	0.685	1.18e-220	3	Gm10076
9.8e-187	0.481777	0.521	0.166	1.58e-182	3	Gstp1
1.65e-182	0.515865	1	1	2.66e-178	3	B2m
4.98e-180	-0.765823	1	0.999	8.04e-176	3	Gm42418
1.23e-177	0.375295	1	1	1.99e-173	3	Rps21
4.34e-177	-0.962587	0.887	0.971	7.02e-173	3	P2ry12
5.95e-167	0.541925	0.752	0.351	9.61e-163	3	Grcc10
8.07e-167	0.917187	0.98	0.922	1.3e-162	3	Mif
3.5e-166	0.409369	1	1	5.65e-162	3	Rps27
6.5e-165	0.680438	0.917	0.662	1.05e-160	3	Rcbtb2
1.01e-159	0.863853	0.892	0.655	1.63e-155	3	Gatm
7.85e-159	0.608274	0.958	0.759	1.27e-154	3	Rnf130
5.05e-156	-4.22357	0.137	0.544	8.16e-152	3	Ftl1-ps1
6.03e-154	-0.383511	1	1	9.74e-150	3	Actb
5.62e-153	0.435796	0.454	0.146	9.07e-149	3	Fam26f
1.61e-152	0.646384	0.701	0.331	2.61e-148	3	Itgax
2.29e-150	-0.620523	0.977	0.996	3.7e-146	3	Ckb
1.46e-148	1.19839	0.889	0.654	2.37e-144	3	Fabp5
4.08e-143	0.559853	1	0.983	6.59e-139	3	Ftl1
4.5e-141	-0.74637	0.607	0.859	7.27e-137	3	Golm1
5.55e-141	0.345731	1	1	8.97e-137	3	Rpl35
6.19e-139	0.474115	0.608	0.261	1e-134	3	Mthfs
2.33e-138	0.798744	0.755	0.424	3.76e-134	3	Bnip3
4e-137	0.352044	1	1	6.46e-133	3	Ctss
4.57e-136	0.308089	1	1	7.38e-132	3	Rps23
4.14e-135	-0.772113	0.995	0.997	6.69e-131	3	Cx3cr1
3.16e-134	0.619479	0.995	0.973	5.1e-130	3	Aldoa
5.42e-133	-0.742652	0.636	0.883	8.75e-129	3	Lcp1
7.03e-132	-0.833679	0.759	0.917	1.14e-127	3	Selplg
1.44e-130	0.496859	0.617	0.278	2.32e-126	3	C1galt1c1
9.17e-123	0.391294	0.518	0.208	1.48e-118	3	Bloc1s1
2.91e-122	0.569455	1	0.999	4.7e-118	3	Ly86
2.08e-120	0.587161	0.781	0.46	3.37e-116	3	Nceh1
3.83e-120	0.63916	0.847	0.586	6.19e-116	3	Cd48
1.21e-119	0.494505	0.997	0.97	1.96e-115	3	Cd300c2
1.69e-118	0.422572	0.661	0.321	2.73e-114	3	Sdhd
9.4e-117	0.353348	1	1	1.52e-112	3	Psap
4.71e-116	0.383891	1	1	7.6e-112	3	Ctsb
1.05e-115	-0.827976	0.178	0.528	1.7e-111	3	Phgdh
4.39e-115	0.461452	0.511	0.213	7.09e-111	3	Clec4a3
4.46e-115	-0.753105	0.624	0.859	7.2e-111	3	Pmepa1
9.46e-115	0.543751	0.998	0.989	1.53e-110	3	Trf
1.26e-114	0.535992	0.941	0.794	2.03e-110	3	Slc11a1
2.4e-113	0.293849	1	1	3.88e-109	3	Npc2
2.22e-110	-0.492151	0.999	0.999	3.59e-106	3	Ddx5
1.33e-108	0.58719	0.859	0.596	2.15e-104	3	Gm1673
1.96e-108	0.700782	0.918	0.789	3.17e-104	3	Pgk1
5.77e-107	0.57273	0.843	0.584	9.32e-103	3	Cebpa
5.67e-106	0.466295	0.982	0.938	9.16e-102	3	Sdcbp
2.78e-105	0.492741	0.985	0.894	4.49e-101	3	Pld3
4.05e-104	0.364468	0.476	0.197	6.54e-100	3	Snhg6
3.32e-102	0.427162	0.674	0.352	5.37e-98	3	1700003F12Rik
7.92e-102	1.56527	0.721	0.514	1.28e-97	3	Apoc1
1.6e-101	0.268837	1	1	2.58e-97	3	Rpl9
1.87e-101	0.618453	0.943	0.84	3.02e-97	3	Zfp36
2.98e-100	-0.55089	0.843	0.943	4.81e-96	3	Msn
2.72e-99	0.431592	0.996	0.997	4.39e-95	3	mt-Nd3
5.89e-99	-0.799322	0.251	0.558	9.52e-95	3	Alox5ap
6.75e-99	-0.478305	0.961	0.987	1.09e-94	3	Cyfip1
9.56e-99	0.507045	0.554	0.266	1.54e-94	3	Sash1
7.51e-98	0.497538	0.937	0.754	1.21e-93	3	Abcg1
1.05e-96	-0.7582	0.606	0.807	1.69e-92	3	Ltc4s
9.46e-96	-0.431088	1	1	1.53e-91	3	Hsp90ab1
1.68e-95	0.348739	1	0.999	2.71e-91	3	Ctsa
2.15e-95	-0.55378	0.73	0.876	3.47e-91	3	Reep5
2.27e-95	0.353365	0.576	0.277	3.67e-91	3	Washc3
6.61e-95	-0.650132	0.402	0.674	1.07e-90	3	P2ry13
3.41e-94	0.627739	0.994	0.985	5.52e-90	3	Pkm
7.14e-94	0.451845	1	0.999	1.15e-89	3	Cd9
1.11e-93	0.472389	0.995	0.962	1.8e-89	3	Bri3
1.2e-93	0.374809	0.597	0.297	1.94e-89	3	Pafah1b3
1.24e-93	0.333399	0.42	0.17	2e-89	3	H2-T22
1.29e-91	0.464045	0.908	0.724	2.08e-87	3	Plgrkt
2.72e-91	0.273522	0.201	0.049	4.39e-87	3	C2
4.12e-91	-0.459128	0.971	0.996	6.65e-87	3	Anxa3
8.97e-91	0.4363	0.918	0.719	1.45e-86	3	Blvrb
3.28e-90	-0.585933	0.905	0.973	5.3e-86	3	Tubb5
8.64e-90	0.720758	0.914	0.86	1.4e-85	3	Tpi1
1.24e-88	0.451225	0.926	0.737	2e-84	3	Dhrs3
1.58e-88	0.383583	0.987	0.947	2.56e-84	3	Asah1
1.84e-88	0.615902	0.77	0.497	2.97e-84	3	Igf1
3.07e-88	-0.605194	0.422	0.672	4.96e-84	3	Tm6sf1
2.07e-87	-0.608007	0.45	0.698	3.35e-83	3	Arsb
1.15e-86	0.403033	0.513	0.242	1.86e-82	3	Plaur
1.6e-86	0.377193	0.626	0.333	2.58e-82	3	Smim4
9.06e-86	0.305053	1	0.999	1.46e-81	3	Rpl22
9.77e-86	0.531183	0.847	0.629	1.58e-81	3	Fcgr2b
4.1e-84	0.393406	0.696	0.41	6.62e-80	3	Prdx3
8.15e-84	0.462769	0.868	0.642	1.32e-79	3	Gltp
2.08e-83	-0.560919	0.871	0.935	3.35e-79	3	Tgfbr1
4.9e-83	0.339976	0.998	0.997	7.91e-79	3	Sat1
1.3e-82	0.435355	0.968	0.91	2.1e-78	3	Gpi1
2.13e-81	0.344399	0.584	0.301	3.45e-77	3	Wdfy1
2.87e-81	0.362058	0.606	0.326	4.64e-77	3	Cmc1
1.61e-80	0.266914	0.27	0.089	2.6e-76	3	Ndrg2
2.07e-79	0.330793	0.578	0.299	3.34e-75	3	Nipsnap3b
4.52e-79	0.339363	0.998	0.996	7.3e-75	3	Creg1
4.55e-79	0.320411	1	1	7.35e-75	3	Ctsl
7.97e-79	-0.517456	0.875	0.952	1.29e-74	3	Ptgs1
1.2e-78	0.524376	0.96	0.92	1.94e-74	3	Eno1
1.42e-78	0.399262	0.77	0.495	2.3e-74	3	Gsto1
1.46e-78	0.262316	1	1	2.36e-74	3	Rpl7a
2e-78	0.447911	0.886	0.707	3.24e-74	3	Hebp1
3.97e-78	0.37181	1	0.999	6.42e-74	3	Cd63
5.86e-78	0.295911	0.41	0.178	9.47e-74	3	Rnf5
2.47e-77	0.362316	0.993	0.981	4e-73	3	Prdx5
3.63e-77	0.347008	0.439	0.202	5.86e-73	3	Ddhd1
7.46e-77	-0.578562	0.737	0.88	1.2e-72	3	Arhgap5
1.21e-76	0.375528	0.992	0.966	1.95e-72	3	Abca1
2.82e-76	0.388001	0.638	0.361	4.56e-72	3	Tmem140
3.05e-76	0.398272	0.661	0.388	4.93e-72	3	Nrbf2
3.48e-76	-0.583872	0.785	0.896	5.62e-72	3	Siglech
6.05e-76	0.431963	0.616	0.348	9.77e-72	3	Fcgr4
8.41e-76	-0.710005	0.36	0.628	1.36e-71	3	Tmsb10
1.05e-75	0.293804	0.315	0.119	1.7e-71	3	Egln3
2.76e-75	0.322911	0.465	0.219	4.46e-71	3	Atp1a3
3.58e-75	0.383695	0.777	0.498	5.78e-71	3	Ost4
9.2e-75	0.311174	0.405	0.178	1.49e-70	3	Prelid2
1.58e-74	0.423013	0.704	0.432	2.55e-70	3	Arl5c
1.95e-74	0.329332	0.4	0.177	3.15e-70	3	Rftn1
3.62e-74	0.354441	0.615	0.346	5.84e-70	3	Sord
4.37e-74	-0.577463	0.587	0.791	7.05e-70	3	Ecscr
6.06e-74	-0.681073	0.472	0.699	9.78e-70	3	Sox4
9.26e-74	0.312258	0.501	0.25	1.5e-69	3	Tap2
1.24e-73	-0.338361	0.997	0.998	2e-69	3	Clic1
2.25e-73	0.311441	0.252	0.084	3.63e-69	3	H2-Q7
2.58e-73	0.355994	0.588	0.322	4.17e-69	3	H2-T23
1.23e-72	0.376633	0.656	0.38	1.99e-68	3	Mitf
2.46e-72	0.267066	0.361	0.15	3.97e-68	3	Smim26
1.09e-71	-0.601248	0.337	0.59	1.76e-67	3	Tuba1a
2.84e-71	0.267633	0.359	0.15	4.59e-67	3	Zfp395
3.55e-71	0.481281	0.466	0.223	5.73e-67	3	Lgals3
6.57e-71	0.32584	0.615	0.344	1.06e-66	3	BC028528
7.06e-71	0.327576	0.631	0.356	1.14e-66	3	Hscb
7.11e-70	0.285894	0.473	0.231	1.15e-65	3	Med30
6.31e-69	0.552451	0.922	0.873	1.02e-64	3	Pgam1
4.99e-68	0.306061	0.507	0.26	8.05e-64	3	Prorsd1
6.42e-68	-0.476577	0.784	0.888	1.04e-63	3	Purb
7.5e-67	0.442264	0.811	0.599	1.21e-62	3	P2rx4
1e-66	0.345879	0.992	0.963	1.62e-62	3	Itm2c
1.57e-66	0.302093	0.508	0.266	2.53e-62	3	Cyp4v3
7.13e-66	0.296654	0.427	0.206	1.15e-61	3	Man2b2
1.69e-65	0.314878	0.655	0.387	2.73e-61	3	Cox17
1.94e-65	0.360444	0.915	0.726	3.13e-61	3	Tomm7
4.25e-65	-0.460232	0.77	0.876	6.87e-61	3	Tln1
5.34e-65	0.350754	0.738	0.478	8.63e-61	3	Erh
7.31e-65	-0.467512	0.929	0.974	1.18e-60	3	Ncl
1.41e-64	0.277573	0.998	0.991	2.28e-60	3	Uqcrh
1.65e-64	0.434083	0.97	0.954	2.67e-60	3	Bcl2a1b
1.81e-64	0.323052	1	0.997	2.92e-60	3	Timp2
1.97e-64	-0.511774	0.553	0.735	3.18e-60	3	Ivns1abp
3.91e-64	0.419709	0.862	0.662	6.32e-60	3	Cd300a
7.62e-64	0.402579	0.945	0.855	1.23e-59	3	Ypel3
1.24e-63	0.301107	0.577	0.321	2.01e-59	3	Psmb9
1.87e-63	0.297455	0.459	0.23	3.01e-59	3	Fblim1
7.14e-63	0.289967	0.461	0.235	1.15e-58	3	Mthfsl
1.47e-62	-0.388714	0.967	0.984	2.37e-58	3	Srrm2
1.72e-62	0.288317	0.489	0.252	2.78e-58	3	Apobec1
4.59e-62	0.272137	0.439	0.215	7.42e-58	3	Neurl2
4.98e-62	-0.543754	0.845	0.919	8.05e-58	3	Tuba1b
1.36e-61	0.329281	1	1	2.19e-57	3	mt-Nd1
3.04e-61	-0.530125	0.532	0.706	4.91e-57	3	Cd34
3.84e-61	0.264101	1	0.998	6.2e-57	3	Unc93b1
6.79e-61	-0.471861	0.762	0.861	1.1e-56	3	Srgap2
7.13e-61	-0.466019	0.665	0.808	1.15e-56	3	Itga6
7.49e-61	-0.484947	0.75	0.872	1.21e-56	3	Sfpq
8.17e-61	0.411014	0.729	0.495	1.32e-56	3	Pfkl
8.3e-61	0.310702	0.543	0.3	1.34e-56	3	Epb41l3
2.24e-60	0.34961	0.929	0.791	3.62e-56	3	Rnf7
2.78e-60	-0.289133	1	0.999	4.5e-56	3	Atp6v0b
2.87e-60	0.378547	0.888	0.734	4.64e-56	3	Bnip3l
3.83e-60	0.290325	0.684	0.418	6.19e-56	3	Unc50
4.69e-60	0.288605	0.535	0.294	7.57e-56	3	Phb
5.61e-60	-0.565233	0.453	0.675	9.06e-56	3	Gpr84
3.08e-59	0.280777	0.561	0.314	4.98e-55	3	Etfa
1.54e-58	0.25535	0.333	0.147	2.49e-54	3	Ikzf2
2.67e-58	-0.339246	0.978	0.99	4.31e-54	3	Mtdh
3.38e-58	0.265488	0.504	0.269	5.45e-54	3	Phyh
1.39e-57	0.351481	1	1	2.25e-53	3	Gapdh
2.81e-57	0.40136	0.589	0.361	4.54e-53	3	Fam162a
5.99e-57	0.311396	0.415	0.209	9.67e-53	3	Ly9
1.14e-56	-0.283857	1	1	1.84e-52	3	Actg1
2.06e-56	0.255467	0.297	0.127	3.33e-52	3	Ier5l
3.74e-56	-0.36898	0.98	0.993	6.04e-52	3	Olfml3
4.34e-56	-0.350252	0.987	0.997	7.01e-52	3	Calm1
4.52e-56	-0.298374	1	1	7.31e-52	3	H3f3b
9.12e-56	-0.446436	0.636	0.771	1.47e-51	3	Nmt1
1.05e-55	0.287451	0.592	0.351	1.7e-51	3	Cept1
1.19e-55	0.386868	0.536	0.304	1.93e-51	3	Ank
1.61e-55	-0.25649	1	1	2.61e-51	3	Csf1r
1.62e-55	0.370851	0.771	0.555	2.61e-51	3	Soat1
2.16e-55	0.289352	0.999	0.995	3.49e-51	3	Ctsh
2.37e-55	0.301974	0.56	0.323	3.84e-51	3	Sdc3
2.75e-55	0.262183	0.426	0.217	4.45e-51	3	Mospd2
4.03e-55	-0.356641	0.958	0.981	6.5e-51	3	Tpm3
4.53e-55	0.258365	0.998	0.993	7.32e-51	3	Rpl27
4.89e-55	0.275296	0.51	0.284	7.9e-51	3	Rab9
6.38e-55	0.344489	0.722	0.487	1.03e-50	3	Znrf2
1.21e-54	0.355512	0.795	0.604	1.96e-50	3	Echs1
4.32e-54	-0.545986	0.623	0.745	6.98e-50	3	AY036118
1.87e-53	0.286616	0.688	0.44	3.02e-49	3	Ndfip2
3.15e-53	0.326763	0.97	0.905	5.08e-49	3	Fam105a
3.61e-53	0.269563	0.488	0.268	5.84e-49	3	H2-M3
5.65e-53	0.265963	0.464	0.252	9.12e-49	3	Mpst
7.48e-53	-0.566252	0.659	0.797	1.21e-48	3	Emp3
1.07e-52	0.273599	0.506	0.283	1.72e-48	3	Idh1
1.1e-52	0.258439	0.319	0.145	1.77e-48	3	Pde8b
1.11e-52	-0.258838	1	1	1.79e-48	3	Gnai2
1.11e-52	0.2802	0.48	0.263	1.79e-48	3	Socs6
1.92e-52	0.39747	0.803	0.62	3.1e-48	3	Ninj1
1.98e-52	-0.469339	0.692	0.825	3.2e-48	3	Slc38a2
2.86e-52	0.303695	0.598	0.366	4.63e-48	3	Gnpda1
3.02e-52	0.269485	0.551	0.32	4.88e-48	3	Arap1
3.19e-52	0.27671	0.635	0.392	5.15e-48	3	Fam174a
3.5e-52	-0.42619	0.118	0.333	5.66e-48	3	Slc2a5
5.88e-52	0.327851	0.82	0.615	9.5e-48	3	Paip2
2.04e-51	0.386384	0.718	0.516	3.3e-47	3	Pitpnc1
2.22e-51	0.308473	0.969	0.903	3.59e-47	3	Tpd52
5.5e-51	0.328441	0.642	0.405	8.89e-47	3	Gpr137b
2.4e-50	0.27529	0.629	0.389	3.87e-46	3	Commd1
2.73e-50	0.312501	0.737	0.512	4.41e-46	3	Dram2
5.74e-50	0.26472	0.682	0.434	9.28e-46	3	Snrpf
1.82e-49	0.320626	0.985	0.975	2.93e-45	3	mt-Nd4l
4.56e-49	0.263101	0.995	0.99	7.37e-45	3	Pabpc1
6.02e-49	0.270126	0.352	0.173	9.73e-45	3	Cpq
7.28e-49	0.276193	0.481	0.273	1.18e-44	3	Grhpr
8.17e-49	0.26862	0.589	0.356	1.32e-44	3	Aagab
1.18e-48	0.310287	0.5	0.288	1.9e-44	3	Gpx3
2.58e-48	-0.390767	0.881	0.951	4.16e-44	3	Ly6e
2.7e-48	0.2799	0.459	0.257	4.37e-44	3	Pkib
5.61e-48	0.273426	0.613	0.38	9.06e-44	3	Gm5617
1.61e-47	0.294916	0.967	0.896	2.6e-43	3	Rpl13a
3.49e-47	-0.357603	0.83	0.902	5.64e-43	3	Itgb1
3.56e-47	0.380676	0.979	0.966	5.76e-43	3	H2-K1
5.45e-47	-0.401137	0.801	0.888	8.8e-43	3	Cmtm7
9.43e-47	0.293767	0.438	0.242	1.52e-42	3	Fnip2
1.77e-46	0.275179	0.479	0.273	2.86e-42	3	Myo5a
1.99e-46	0.386101	0.879	0.757	3.21e-42	3	Cstb
2.04e-46	-0.362046	0.036	0.215	3.3e-42	3	Ccnd1
2.72e-46	-0.42076	0.665	0.797	4.39e-42	3	Nrip1
2.78e-46	0.355423	0.741	0.544	4.49e-42	3	Lgals3bp
2.94e-46	0.252215	0.594	0.367	4.76e-42	3	Commd6
5.77e-46	-0.355482	0.83	0.896	9.31e-42	3	Wasf2
5.87e-46	0.267797	0.533	0.32	9.48e-42	3	Aig1
6.27e-46	0.263795	0.607	0.378	1.01e-41	3	Ptafr
1.05e-45	-0.392972	0.96	0.989	1.69e-41	3	Hsp90b1
1.18e-45	-0.413529	0.633	0.784	1.9e-41	3	Rnase4
1.32e-45	0.394332	0.687	0.473	2.14e-41	3	Cst7
2.39e-45	-0.418838	0.85	0.921	3.87e-41	3	Zfhx3
5.84e-45	0.264421	0.418	0.226	9.44e-41	3	Serpinb6a
1.33e-44	-0.47186	0.318	0.501	2.14e-40	3	Slamf9
2.51e-44	-0.395004	0.937	0.966	4.06e-40	3	Hnrnpa2b1
3.4e-44	-0.385988	0.781	0.862	5.5e-40	3	Cd37
3.69e-44	0.263842	0.44	0.247	5.96e-40	3	Gas2l3
4.19e-44	0.317641	0.795	0.61	6.78e-40	3	Atp6v1b2
9.32e-44	0.264753	0.985	0.96	1.51e-39	3	Gpx4
3.53e-43	-0.431647	0.444	0.608	5.7e-39	3	Ubash3b
1.36e-42	0.285787	0.484	0.279	2.19e-38	3	Anxa2
2.42e-42	0.283189	0.635	0.424	3.9e-38	3	Trappc6a
3.5e-42	0.295088	0.948	0.871	5.65e-38	3	Lmo2
6.37e-42	-0.400618	0.769	0.866	1.03e-37	3	Macf1
8.06e-42	0.277675	0.626	0.413	1.3e-37	3	Alas1
2.15e-41	-0.361384	0.633	0.761	3.48e-37	3	Rab3il1
3.54e-41	-0.321913	0.911	0.958	5.72e-37	3	Apbb1ip
4.24e-41	0.265027	0.964	0.873	6.84e-37	3	Sem1
4.26e-41	0.278002	0.726	0.516	6.88e-37	3	Hprt
4.78e-41	0.27281	0.676	0.455	7.72e-37	3	Ethe1
6.19e-41	-0.305428	0.95	0.973	1e-36	3	Sf3b1
7.95e-41	-0.390532	0.173	0.361	1.28e-36	3	Cdk6
1.17e-40	-0.463764	0.223	0.413	1.88e-36	3	Nes
1.2e-40	-0.38501	0.605	0.724	1.94e-36	3	Tacc1
1.22e-40	0.274706	0.839	0.618	1.97e-36	3	Bax
1.35e-40	-0.272324	0.99	0.996	2.18e-36	3	Coro1a
3.29e-40	-0.593086	0.365	0.556	5.31e-36	3	Ccl12
3.51e-40	0.279663	0.987	0.977	5.67e-36	3	Glul
4.04e-40	-0.386214	0.899	0.954	6.53e-36	3	Fus
4.53e-40	-0.400927	0.478	0.632	7.33e-36	3	Mgat4a
1.19e-39	-0.416273	0.848	0.906	1.92e-35	3	Ppp1r10
2.73e-39	0.273188	0.655	0.444	4.41e-35	3	AU020206
4.52e-39	0.271356	0.995	0.99	7.31e-35	3	Gpr34
8.49e-39	-0.38354	0.522	0.66	1.37e-34	3	Arrb2
8.98e-39	-0.399918	0.51	0.663	1.45e-34	3	Dock10
1.03e-38	-0.327286	0.999	0.999	1.66e-34	3	Malat1
1.29e-38	-0.308431	0.046	0.207	2.09e-34	3	Igfbp4
1.5e-38	-0.364961	0.686	0.796	2.42e-34	3	Cttnbp2nl
1.91e-38	0.277941	0.77	0.578	3.09e-34	3	Igbp1
2.03e-38	-0.433405	0.318	0.502	3.28e-34	3	Cebpd
4.38e-38	0.290371	0.838	0.678	7.08e-34	3	Atp13a2
5.12e-38	-0.374904	0.566	0.681	8.27e-34	3	Adam15
6.67e-38	-0.300777	0.964	0.983	1.08e-33	3	Gusb
6.97e-38	-0.273552	0.992	0.991	1.13e-33	3	Pld4
1.2e-37	0.25746	0.797	0.606	1.94e-33	3	Sptssa
1.76e-37	-0.336441	0.882	0.928	2.85e-33	3	Hnrnpu
5.26e-37	-0.283253	0.987	0.996	8.5e-33	3	Rrbp1
1.03e-36	0.353163	0.805	0.683	1.66e-32	3	Aplp2
1.09e-36	-0.389743	0.807	0.868	1.76e-32	3	Hk2
1.41e-36	0.292668	0.959	0.915	2.28e-32	3	Mpc1
2.27e-36	-0.332868	0.715	0.807	3.67e-32	3	Ptpn6
2.3e-36	-0.317823	0.912	0.948	3.72e-32	3	Arhgdib
4.91e-36	0.307152	0.886	0.781	7.93e-32	3	Lipa
5.29e-36	0.290275	0.726	0.53	8.54e-32	3	Anxa5
1.39e-35	0.254734	0.991	0.985	2.25e-31	3	Pycard
3.04e-35	0.275312	0.908	0.795	4.91e-31	3	Selenow
3.13e-35	0.315574	0.634	0.451	5.06e-31	3	Arid5b
4.03e-35	-0.372113	0.774	0.856	6.51e-31	3	Tra2b
4.37e-35	0.250075	0.93	0.846	7.06e-31	3	Ndufc2
1.46e-34	-0.333684	0.708	0.8	2.35e-30	3	Gmfg
1.85e-34	-0.360755	0.783	0.869	2.99e-30	3	Ssh2
2.91e-34	0.251949	0.869	0.706	4.69e-30	3	Scp2
5.86e-34	-0.342517	0.634	0.735	9.46e-30	3	Man1a2
7.64e-34	0.272606	0.888	0.766	1.23e-29	3	Ndufv3
2.46e-33	0.262546	0.797	0.623	3.97e-29	3	Ndufa1
3.95e-33	0.259755	0.89	0.756	6.37e-29	3	Tmem256
5.23e-33	0.301299	0.706	0.531	8.44e-29	3	AC149090.1
8.49e-33	0.287362	0.743	0.569	1.37e-28	3	Igsf6
1.15e-32	0.257225	0.774	0.609	1.86e-28	3	Il10rb
6.62e-32	-0.444175	0.318	0.474	1.07e-27	3	Marcksl1
7.17e-32	-0.346181	0.473	0.603	1.16e-27	3	Mlec
8.26e-32	0.265154	0.851	0.719	1.33e-27	3	Dazap2
2.04e-31	-0.373542	0.888	0.925	3.29e-27	3	Dynll1
2.09e-31	0.251658	0.813	0.648	3.37e-27	3	Man1c1
2.39e-31	-0.309285	0.837	0.897	3.85e-27	3	Ptprc
3.86e-31	-0.348669	0.205	0.362	6.24e-27	3	Rapgef5
5.2e-31	-0.357729	0.911	0.949	8.4e-27	3	Srsf2
6.04e-31	-0.329378	0.691	0.807	9.76e-27	3	Lsp1
1.57e-30	0.270156	0.675	0.504	2.54e-26	3	Arl11
1.75e-30	0.264032	0.804	0.644	2.83e-26	3	Dtnbp1
2.89e-30	-0.252236	0.071	0.213	4.68e-26	3	Rtn1
3.83e-30	-0.357861	0.497	0.623	6.19e-26	3	Spint1
6.54e-30	-0.273493	0.982	0.989	1.06e-25	3	Epb41l2
1.56e-29	-0.306958	0.782	0.851	2.52e-25	3	Prrc2c
1.59e-29	-0.334884	0.688	0.77	2.56e-25	3	Hnrnpdl
2.91e-29	-0.410886	0.927	0.979	4.69e-25	3	Jun
3.01e-29	0.257228	0.866	0.734	4.86e-25	3	Serp1
3.03e-29	-0.296939	0.802	0.867	4.9e-25	3	Ubap2l
5.59e-29	-0.335208	0.233	0.385	9.02e-25	3	Flna
9.74e-29	0.343174	0.85	0.752	1.57e-24	3	Gas6
1.28e-28	-0.320806	0.717	0.8	2.07e-24	3	Ankrd11
1.36e-28	0.330612	0.889	0.873	2.2e-24	3	Ccl3
1.85e-28	0.256238	0.782	0.638	2.99e-24	3	Cd47
4.63e-28	-0.313828	0.694	0.768	7.48e-24	3	Srrm1
1.98e-27	-0.302495	0.954	0.985	3.2e-23	3	Hspa5
2.05e-27	0.300321	0.606	0.455	3.32e-23	3	Egln1
5.26e-27	-0.319727	0.463	0.583	8.5e-23	3	Cd164
5.46e-27	-0.272631	0.999	1	8.82e-23	3	Ptma
5.53e-27	-0.324851	0.389	0.523	8.93e-23	3	Elmo1
6.74e-27	-0.295202	0.813	0.877	1.09e-22	3	Top1
9.26e-27	-0.388647	0.51	0.61	1.5e-22	3	Prdx4
1.49e-26	-0.335495	0.64	0.731	2.4e-22	3	Hnrnpab
2.14e-26	0.264389	0.775	0.628	3.46e-22	3	Rassf4
2.78e-26	-0.314973	0.936	0.98	4.5e-22	3	Calr
2.87e-26	-0.322156	0.669	0.74	4.63e-22	3	Dync1i2
8.24e-26	-0.313569	0.492	0.61	1.33e-21	3	Camk2d
8.88e-26	-0.318766	0.947	0.972	1.43e-21	3	Hsp90aa1
1.09e-25	-0.263346	0.803	0.842	1.77e-21	3	Pafah1b1
1.42e-25	-0.293812	0.729	0.84	2.29e-21	3	Pdia6
2.51e-25	-0.274034	0.188	0.329	4.06e-21	3	Tjp1
2.56e-25	-0.274623	0.856	0.898	4.13e-21	3	Ppp1r14b
2.63e-25	-0.328797	0.669	0.763	4.26e-21	3	Smad7
3.46e-25	-0.31785	0.471	0.585	5.59e-21	3	St3gal5
4.04e-25	-0.33361	0.359	0.489	6.53e-21	3	Klf7
4.93e-25	-0.340373	0.842	0.896	7.97e-21	3	Maf
7.59e-25	-0.263849	0.779	0.834	1.23e-20	3	Snx17
9.75e-25	-0.262426	0.866	0.895	1.58e-20	3	Vcp
9.77e-25	0.302352	0.811	0.681	1.58e-20	3	Ccl6
1.2e-24	-0.278483	0.723	0.785	1.94e-20	3	Orai1
1.22e-24	-0.336832	0.541	0.641	1.97e-20	3	Dst
1.67e-24	-0.274007	0.89	0.924	2.71e-20	3	Mef2a
1.36e-23	-0.327086	0.874	0.912	2.19e-19	3	Mat2a
4.66e-23	-0.312646	0.607	0.688	7.53e-19	3	Prpf4b
9.79e-23	-0.275052	0.688	0.752	1.58e-18	3	Snx6
1.07e-22	0.309441	0.879	0.848	1.72e-18	3	Tmem176a
1.09e-22	-0.298596	0.581	0.671	1.76e-18	3	Morc3
1.77e-22	-0.25719	0.893	0.926	2.86e-18	3	Picalm
2.15e-22	-0.262786	0.785	0.814	3.47e-18	3	Ywhaz
3.89e-22	0.354598	0.861	0.826	6.28e-18	3	Hpgd
5.2e-22	-0.280142	0.793	0.83	8.4e-18	3	Celf2
9.62e-22	0.332085	0.914	0.904	1.55e-17	3	Ldha
1.14e-21	-0.290544	0.885	0.928	1.84e-17	3	Dnaja1
1.24e-21	-0.381823	0.296	0.424	2e-17	3	Nav3
1.6e-21	-0.256527	0.812	0.877	2.58e-17	3	Bmp2k
1.76e-21	-0.262379	0.557	0.66	2.85e-17	3	Asph
1.8e-21	-0.281693	0.617	0.71	2.91e-17	3	Mycbp2
2.17e-21	-0.265327	0.927	0.954	3.51e-17	3	Srsf3
2.19e-21	-0.277605	0.58	0.665	3.54e-17	3	Ppp1r18
3.22e-21	-0.287779	0.608	0.683	5.2e-17	3	Rps6ka1
3.58e-21	-0.268674	0.709	0.777	5.78e-17	3	Tcn2
4.68e-21	-0.279692	0.87	0.922	7.55e-17	3	Skil
8.5e-21	-0.255959	0.844	0.882	1.37e-16	3	Eif3a
1.49e-20	-0.253699	0.811	0.845	2.41e-16	3	Sec11c
1.58e-20	-0.267338	0.618	0.698	2.55e-16	3	Bptf
2.03e-20	-0.330079	0.467	0.559	3.28e-16	3	Tuba1c
2.17e-20	-0.291158	0.41	0.518	3.51e-16	3	Pbxip1
2.56e-20	-0.276241	0.503	0.597	4.14e-16	3	Lgals9
2.84e-20	-0.295702	0.456	0.552	4.59e-16	3	Lrrfip1
2.25e-19	-0.276901	0.74	0.818	3.64e-15	3	Rbbp6
2.65e-19	-0.265115	0.689	0.763	4.27e-15	3	Ntpcr
2.76e-19	-0.277953	0.447	0.547	4.46e-15	3	Syncrip
2.81e-19	-0.269644	0.595	0.667	4.54e-15	3	Rdx
3.24e-19	-0.252553	0.856	0.888	5.23e-15	3	Ndufa4
3.57e-19	-0.258499	0.768	0.829	5.77e-15	3	Frmd4a
3.87e-19	-0.256697	0.712	0.766	6.25e-15	3	Ccdc12
1.47e-18	-0.257236	0.701	0.773	2.38e-14	3	Atrx
1.54e-18	-0.2587	0.612	0.686	2.49e-14	3	Sipa1
3.29e-18	-0.257101	0.663	0.733	5.31e-14	3	Slc16a6
4.39e-18	-0.250909	0.718	0.767	7.09e-14	3	Ddost
5.26e-18	-0.256399	0.477	0.569	8.49e-14	3	Gna15
6.27e-18	-0.263822	0.66	0.72	1.01e-13	3	Hnrnpd
8.14e-18	-0.441785	0.339	0.447	1.31e-13	3	Tnf
1.32e-17	-0.270603	0.725	0.78	2.13e-13	3	Ddx3x
2.29e-17	-0.272029	0.545	0.613	3.7e-13	3	Hnrnpm
3.16e-17	-0.26577	0.817	0.843	5.11e-13	3	Jpt1
3.29e-17	-0.278089	0.423	0.52	5.32e-13	3	St3gal6
4.25e-17	-0.256364	0.714	0.749	6.87e-13	3	Smarca5
8.24e-17	-0.261101	0.404	0.503	1.33e-12	3	Ddx21
1.41e-16	-0.251578	0.724	0.77	2.27e-12	3	Set
3.32e-16	-0.26713	0.498	0.59	5.36e-12	3	Camk2n1
5.02e-16	-0.254961	0.594	0.652	8.11e-12	3	Phf14
1.6e-15	-0.276796	0.574	0.649	2.58e-11	3	Rel
2.52e-15	-0.312374	0.748	0.787	4.08e-11	3	Ube2s
8.1e-15	-0.282795	0.573	0.635	1.31e-10	3	Fam102b
3.9e-14	-0.28518	0.762	0.795	6.29e-10	3	Ccr5
4.57e-14	-0.647465	0.472	0.539	7.39e-10	3	Stmn1
1.61e-13	-0.285027	0.743	0.765	2.59e-09	3	Ran
2.4e-11	-0.263342	0.675	0.709	3.88e-07	3	Txnip
2.93e-11	-0.266967	0.584	0.619	4.73e-07	3	Srsf7
1.38e-10	-0.287064	0.893	0.946	2.23e-06	3	Klf2
3.54e-07	-0.296956	0.539	0.585	0.0057265	3	Il1a
4.38e-05	-0.262118	0.513	0.537	0.707584	3	Tubb4b
0.00104031	-0.639925	0.815	0.749	1	3	Hmox1
0	3.39363	0.582	0.065	0	4	Cxcl2
0	2.31903	0.435	0.067	0	4	Cxcl10
2.5e-270	2.71361	0.531	0.151	4.04e-266	4	Il1b
4.69e-180	0.798574	0.58	0.214	7.58e-176	4	Tnfaip3
1.37e-175	1.24753	0.909	0.697	2.22e-171	4	Cd83
4.04e-168	1.01426	0.481	0.157	6.53e-164	4	Ccrl2
5.98e-167	0.772243	0.989	0.954	9.66e-163	4	Nfkbia
4.47e-154	0.98262	0.836	0.519	7.22e-150	4	Nfkbiz
3.11e-109	1.05145	0.785	0.51	5.03e-105	4	Dusp2
6.83e-105	0.727231	0.716	0.433	1.1e-100	4	Arl5c
2.7e-103	0.607675	0.604	0.31	4.37e-99	4	Nfkbid
3.32e-96	1.12756	0.914	0.831	5.36e-92	4	Ccl4
7.66e-96	0.97055	0.547	0.278	1.24e-91	4	Sdc4
1e-95	0.655444	0.985	0.952	1.62e-91	4	Bcl2a1b
3.26e-94	0.678286	0.807	0.56	5.26e-90	4	Tlr2
7.67e-94	1.03016	0.923	0.87	1.24e-89	4	Ccl3
3.75e-90	0.766984	0.497	0.241	6.06e-86	4	Nr4a1
3.08e-89	0.999464	0.678	0.418	4.97e-85	4	Tnf
3.73e-87	0.821266	0.933	0.842	6.03e-83	4	Zfp36
4.13e-84	0.662735	0.549	0.288	6.67e-80	4	Slfn2
4.35e-84	0.486973	0.996	0.984	7.03e-80	4	Mcl1
1.13e-83	0.611541	0.608	0.347	1.82e-79	4	Nlrp3
8.04e-78	0.601152	0.989	0.937	1.3e-73	4	Ier2
4.23e-77	0.453277	0.423	0.192	6.84e-73	4	Casp4
3.59e-74	-0.609877	0.905	0.969	5.79e-70	4	P2ry12
4.92e-72	0.521562	0.748	0.5	7.95e-68	4	Kdm6b
1.25e-68	0.474473	0.839	0.611	2.02e-64	4	Tgif1
2.79e-66	0.603335	0.775	0.548	4.5e-62	4	Ifrd1
3.71e-65	0.41636	0.999	0.993	5.99e-61	4	Junb
2.99e-59	0.414506	0.309	0.132	4.83e-55	4	Bcl2a1d
8.41e-58	0.593363	0.339	0.154	1.36e-53	4	Egr3
4.12e-57	-0.701041	0.498	0.685	6.65e-53	4	Tmem119
1.52e-56	0.34731	0.994	0.984	2.45e-52	4	Ftl1
5.23e-56	0.47278	0.779	0.599	8.45e-52	4	Sowahc
1.64e-54	0.45507	0.986	0.969	2.66e-50	4	Ier3
3.6e-54	0.382904	0.457	0.248	5.82e-50	4	Plaur
4.02e-54	0.465157	0.805	0.63	6.49e-50	4	Rel
1.36e-52	-1.68966	0.309	0.528	2.2e-48	4	Ftl1-ps1
2.04e-52	0.344916	0.519	0.3	3.29e-48	4	Map3k8
1.41e-51	0.478412	0.888	0.774	2.28e-47	4	Nfe2l2
3.72e-51	0.304083	0.31	0.14	6.01e-47	4	Maff
2.57e-50	0.363131	0.999	0.998	4.14e-46	4	Lyz2
1.27e-48	0.481694	0.651	0.446	2.06e-44	4	Marcksl1
2.53e-48	0.375421	0.97	0.939	4.08e-44	4	Ccnl1
4.39e-46	0.720507	0.713	0.551	7.1e-42	4	Cd14
5e-46	0.427028	0.837	0.678	8.08e-42	4	Slc15a3
7.75e-46	0.259303	0.338	0.165	1.25e-41	4	Birc3
2.01e-44	0.612311	0.965	0.953	3.24e-40	4	Fos
9.66e-44	0.468332	0.989	0.969	1.56e-39	4	Btg2
2.83e-43	0.410513	0.46	0.275	4.58e-39	4	Sash1
2.45e-42	0.315038	0.574	0.373	3.96e-38	4	Plekho2
3.99e-42	0.324155	1	1	6.45e-38	4	Apoe
4.79e-42	0.677757	0.77	0.648	7.74e-38	4	Gpr84
3.19e-41	0.304473	0.36	0.193	5.16e-37	4	Csrnp1
2.53e-40	0.358395	0.378	0.209	4.08e-36	4	Gpr65
6.32e-40	-0.464085	0.836	0.909	1.02e-35	4	Selplg
9.54e-40	0.306306	0.282	0.135	1.54e-35	4	Pim1
1.25e-39	0.38177	0.482	0.302	2.02e-35	4	Tnfaip2
4.28e-39	0.259513	0.282	0.136	6.91e-35	4	Pde4b
5.26e-39	0.356889	0.781	0.613	8.5e-35	4	Vmp1
1.96e-38	0.437949	0.454	0.274	3.16e-34	4	Gem
3.85e-37	0.520706	0.519	0.344	6.22e-33	4	Rrad
5.32e-36	0.260034	0.999	0.999	8.59e-32	4	Cd63
6.63e-36	0.309298	0.35	0.191	1.07e-31	4	Rab7b
7.1e-36	0.368539	0.294	0.151	1.15e-31	4	Osm
5.54e-35	0.266993	0.433	0.262	8.95e-31	4	Nab2
6.83e-35	0.426571	0.931	0.894	1.1e-30	4	Icam1
9.34e-35	0.300173	0.487	0.31	1.51e-30	4	Cd74
7.33e-34	0.291871	1	0.999	1.18e-29	4	Selenop
1.15e-33	-0.529009	0.488	0.635	1.86e-29	4	Gadd45g
2.8e-33	0.331622	0.5	0.325	4.52e-29	4	Rilpl2
3.23e-33	0.302531	0.34	0.189	5.22e-29	4	Phlda1
4.64e-33	0.290894	0.444	0.279	7.49e-29	4	Gm17056
1.52e-32	-0.259658	0.986	0.995	2.45e-28	4	Ckb
1.77e-32	0.625336	0.98	0.976	2.86e-28	4	Mt1
2.39e-32	-0.350602	0.921	0.948	3.86e-28	4	Srsf2
3.9e-32	0.350828	0.635	0.465	6.31e-28	4	Cxcl16
6.81e-32	0.822766	0.686	0.573	1.1e-27	4	Il1a
5.4e-31	-0.437484	0.387	0.545	8.73e-27	4	Alox5ap
1.16e-30	-0.325954	0.999	0.997	1.88e-26	4	Cx3cr1
1.5e-30	0.54949	0.446	0.295	2.43e-26	4	Mt2
1.75e-30	0.281524	0.374	0.224	2.82e-26	4	Rasgef1b
1.83e-30	0.397988	0.678	0.506	2.95e-26	4	Igf1
2.52e-30	0.306413	0.487	0.318	4.07e-26	4	Irf1
3.09e-30	-0.310236	0.896	0.95	4.99e-26	4	Ptgs1
4.85e-30	0.313082	0.582	0.414	7.83e-26	4	Coq10b
5.33e-30	0.34812	0.502	0.345	8.61e-26	4	Rab20
5.48e-30	-0.350968	0.813	0.893	8.85e-26	4	Siglech
8.83e-30	0.302253	0.647	0.473	1.43e-25	4	Nceh1
1.09e-29	0.2657	0.44	0.278	1.76e-25	4	Arl5b
1.18e-28	0.314481	0.662	0.477	1.9e-24	4	Cst7
1.84e-28	0.317797	0.747	0.596	2.97e-24	4	Dennd4a
1.05e-27	0.37832	0.934	0.918	1.69e-23	4	Uba52
1.15e-27	0.322987	0.453	0.306	1.85e-23	4	Trib1
1.45e-27	0.440519	0.87	0.796	2.33e-23	4	Neat1
2.01e-27	0.276246	0.266	0.145	3.24e-23	4	Malt1
9.17e-26	0.327305	0.83	0.714	1.48e-21	4	Sqstm1
1.58e-24	0.310851	0.561	0.416	2.55e-20	4	Pmaip1
2.06e-24	0.283135	0.581	0.437	3.33e-20	4	Tifa
3.13e-24	0.408432	0.381	0.244	5.06e-20	4	Csf1
3.32e-24	-0.33328	0.546	0.66	5.36e-20	4	P2ry13
3.55e-24	0.399828	0.841	0.788	5.73e-20	4	Lpl
3.69e-23	0.260387	0.694	0.556	5.95e-19	4	Nfkb1
4.54e-23	0.639155	0.636	0.522	7.34e-19	4	Apoc1
4.58e-23	0.268021	0.751	0.606	7.39e-19	4	Gm1673
7.43e-23	0.384058	0.865	0.79	1.2e-18	4	Plin2
1.53e-22	0.265025	0.717	0.589	2.48e-18	4	Litaf
4.96e-22	-0.311397	0.624	0.713	8.01e-18	4	Txnip
1.28e-21	0.253195	0.757	0.625	2.06e-17	4	Ninj1
2.15e-21	-0.312288	0.84	0.896	3.48e-17	4	Maf
2.61e-21	0.283888	0.706	0.573	4.21e-17	4	Igsf6
4.23e-21	0.575993	0.734	0.628	6.84e-17	4	Cebpb
4.34e-21	0.255354	0.451	0.312	7.01e-17	4	Ank
1.09e-20	-0.298283	0.829	0.872	1.76e-16	4	Arhgap5
1.3e-20	0.565849	0.745	0.667	2.1e-16	4	Fabp5
2.42e-20	0.277577	0.929	0.881	3.9e-16	4	C3ar1
1.37e-19	-0.25615	0.883	0.918	2.22e-15	4	Zfhx3
2.36e-19	0.331224	0.905	0.862	3.81e-15	4	Klf6
2.72e-19	-0.261903	0.978	0.987	4.4e-15	4	Mafb
5.13e-19	0.291772	0.532	0.406	8.29e-15	4	C5ar1
1.53e-18	-0.316804	0.704	0.798	2.48e-14	4	Ltc4s
1.68e-18	0.432151	0.791	0.724	2.72e-14	4	Gadd45b
2.32e-18	-0.379577	0.517	0.613	3.76e-14	4	Tmsb10
8.37e-18	-0.31023	0.883	0.915	1.35e-13	4	Tuba1b
1.54e-17	0.265108	0.986	0.989	2.49e-13	4	H2-D1
2.84e-17	-0.267646	0.689	0.781	4.59e-13	4	Ecscr
4.42e-16	0.495703	0.879	0.855	7.14e-12	4	Atf3
6.3e-16	-0.270538	0.736	0.797	1.02e-11	4	Ccr5
1.11e-15	0.322235	0.772	0.685	1.8e-11	4	Ccl6
1.63e-15	0.270048	0.28	0.185	2.63e-11	4	Gm26522
1.84e-15	-0.268745	0.893	0.924	2.98e-11	4	Dynll1
4.21e-15	0.512135	0.65	0.578	6.8e-11	4	Id2
1.83e-14	0.50921	0.378	0.264	2.96e-10	4	Spp1
2.86e-13	0.256119	0.508	0.396	4.63e-09	4	Socs3
1.27e-12	0.273733	0.522	0.428	2.05e-08	4	Npl
2.72e-12	0.313959	0.58	0.489	4.39e-08	4	Pdgfb
2.82e-12	-0.288203	0.753	0.786	4.55e-08	4	Ube2s
8.15e-12	-0.271975	0.507	0.575	1.32e-07	4	Tuba1a
4.56e-11	-0.295155	0.577	0.669	7.36e-07	4	Crybb1
3.73e-08	0.250584	0.863	0.829	0.000603	4	Dusp1
8.53e-08	0.39083	0.368	0.296	0.00137745	4	Ccl2
1.58e-06	-0.304599	0.668	0.697	0.0254902	4	Hmgb2
0.00711218	0.317053	0.921	0.943	1	4	Klf2
0	4.27905	1	0.229	0	5	Spp1
1.38e-151	0.642284	1	1	2.23e-147	5	Ctsl
5.35e-149	1.43497	0.921	0.658	8.64e-145	5	Fabp5
1.8e-147	1.1859	0.967	0.781	2.91e-143	5	Lpl
2.13e-142	0.62783	1	0.999	3.44e-138	5	Cd63
8.29e-137	0.925539	0.868	0.498	1.34e-132	5	Igf1
1.63e-134	0.460764	1	1	2.63e-130	5	Ctsz
1.25e-114	0.857556	0.967	0.786	2.01e-110	5	Plin2
1.85e-111	0.626784	0.999	0.984	2.99e-107	5	Ftl1
1.75e-97	0.548914	1	0.999	2.83e-93	5	Cd9
2.8e-94	0.744226	0.552	0.236	4.52e-90	5	Csf1
6.32e-94	0.544886	0.999	0.98	1.02e-89	5	Syngr1
1.71e-92	0.443916	1	0.999	2.76e-88	5	Hexa
1.49e-90	0.44426	1	1	2.4e-86	5	Ctsd
2.67e-90	0.620443	0.885	0.601	4.32e-86	5	Gm1673
3.91e-90	0.461931	1	0.997	6.32e-86	5	Timp2
4.47e-89	-0.513601	0.971	0.995	7.22e-85	5	Serinc3
6.15e-89	0.518276	0.563	0.253	9.94e-85	5	Vat1
9.45e-89	0.537212	0.508	0.218	1.53e-84	5	Adssl1
1.65e-88	0.393206	1	1	2.66e-84	5	Cyba
2.92e-84	0.378427	1	1	4.71e-80	5	Ctsb
8.1e-83	-0.769621	0.773	0.912	1.31e-78	5	Selplg
2.55e-82	0.307101	1	1	4.13e-78	5	Tyrobp
2.81e-81	0.652098	0.991	0.976	4.54e-77	5	Calr
9.55e-80	0.429732	0.999	0.996	1.54e-75	5	Creg1
1.04e-79	0.581233	0.963	0.862	1.67e-75	5	Psmb6
8.42e-79	-0.571569	0.901	0.975	1.36e-74	5	Lpcat2
2.27e-78	0.444368	0.997	0.993	3.67e-74	5	Cotl1
4.57e-76	-0.727577	0.904	0.968	7.39e-72	5	P2ry12
1.03e-74	0.522012	0.425	0.176	1.67e-70	5	Fabp3
2.18e-74	0.518258	0.905	0.62	3.52e-70	5	Bax
4.14e-73	0.43471	0.991	0.981	6.69e-69	5	Gusb
1.4e-71	0.442302	0.994	0.978	2.27e-67	5	Ucp2
5.65e-70	0.505495	0.971	0.898	9.12e-66	5	Pld3
7.53e-70	0.812835	0.869	0.681	1.22e-65	5	Ccl6
5.73e-69	0.574707	0.585	0.307	9.25e-65	5	Ank
3.78e-68	-0.926291	0.452	0.684	6.1e-64	5	Tmem119
9.24e-68	0.544323	0.793	0.531	1.49e-63	5	Anxa5
1.78e-64	-0.572194	0.969	0.989	2.88e-60	5	Egr1
4.08e-64	0.457137	0.286	0.097	6.59e-60	5	Fn1
1e-61	0.518605	0.777	0.541	1.62e-57	5	Rhoc
5.03e-60	0.373893	0.999	1	8.13e-56	5	mt-Nd2
9.43e-60	0.342502	1	0.998	1.52e-55	5	Fcrls
5.05e-58	0.435966	0.727	0.459	8.17e-54	5	Acadl
4.15e-57	-0.545736	0.81	0.922	6.7e-53	5	Zfhx3
4.6e-57	-0.352057	1	1	7.44e-53	5	H3f3b
1.15e-56	0.356555	0.462	0.223	1.86e-52	5	Sulf2
1.9e-56	0.575693	0.73	0.476	3.06e-52	5	Cst7
2.14e-56	0.489384	0.914	0.758	3.46e-52	5	Cstb
7.35e-56	0.643081	0.472	0.237	1.19e-51	5	Lgals1
6.64e-54	-0.292654	1	1	1.07e-49	5	Ctss
7.42e-54	0.347123	0.999	1	1.2e-49	5	mt-Nd1
4.5e-53	0.435077	0.739	0.47	7.27e-49	5	Nceh1
9.57e-53	0.384048	0.365	0.158	1.55e-48	5	Fam20c
1.02e-51	0.421976	0.535	0.289	1.65e-47	5	Crip1
1.16e-51	0.438456	0.917	0.751	1.87e-47	5	Lrpap1
1.51e-51	-0.298505	1	1	2.44e-47	5	Csf1r
2.61e-51	-0.501772	0.937	0.975	4.21e-47	5	Ier5
6.13e-51	-0.487548	0.873	0.95	9.91e-47	5	Ptgs1
1.54e-50	0.45179	0.997	0.986	2.49e-46	5	Hsp90b1
7.83e-49	0.471127	0.866	0.682	1.26e-44	5	Aplp2
1.26e-47	0.315604	0.997	0.992	2.03e-43	5	Abhd12
1.66e-47	0.277692	1	1	2.68e-43	5	Grn
2.57e-47	0.406106	0.921	0.781	4.16e-43	5	Lipa
3.94e-47	0.482053	0.595	0.357	6.36e-43	5	Pmp22
6.2e-47	0.362552	0.997	0.993	1e-42	5	Cd68
3.8e-46	-0.368803	0.999	0.999	6.13e-42	5	Ddx5
4.86e-46	0.327611	0.99	0.97	7.85e-42	5	Akr1a1
8.85e-46	0.41971	0.645	0.411	1.43e-41	5	Gpr137b
5.24e-45	-0.532397	0.68	0.816	8.47e-41	5	Lst1
9.31e-45	0.338061	0.475	0.25	1.5e-40	5	Gas2l3
2.62e-44	0.383183	0.493	0.269	4.22e-40	5	Myo1e
3.38e-44	0.423141	0.685	0.464	5.47e-40	5	Il11ra1
2.43e-43	-0.504396	0.791	0.893	3.93e-39	5	Siglech
4.09e-43	0.319558	0.347	0.16	6.6e-39	5	Dab2
4.35e-43	0.356406	0.393	0.192	7.03e-39	5	Rab7b
1.31e-42	-0.442551	0.986	0.994	2.11e-38	5	Junb
1.71e-42	0.391185	0.686	0.464	2.77e-38	5	Uap1l1
2.81e-42	0.712551	0.665	0.464	4.53e-38	5	Ccl9
3.19e-42	0.411617	0.612	0.389	5.16e-38	5	Rap2b
4.88e-42	0.343048	0.954	0.882	7.88e-38	5	Ndufa4
6.43e-42	0.305506	0.994	0.984	1.04e-37	5	Ybx1
6.5e-42	0.32614	0.602	0.37	1.05e-37	5	Dpp7
1.18e-41	-0.434385	0.908	0.969	1.91e-37	5	Pou2f2
1.3e-41	0.385757	0.889	0.7	2.1e-37	5	Nme1
1.73e-41	0.362802	0.816	0.607	2.8e-37	5	Echs1
2.33e-41	-0.378983	0.962	0.98	3.76e-37	5	Ifngr1
3.34e-41	0.345312	0.698	0.456	5.4e-37	5	Psat1
5.83e-41	0.466829	0.914	0.826	9.42e-37	5	Pdia6
9.12e-39	0.382782	0.967	0.924	1.47e-34	5	Mif
1.49e-38	0.350661	0.982	0.944	2.41e-34	5	Spcs2
2.31e-38	0.359758	0.855	0.682	3.73e-34	5	Tmem160
4.01e-38	0.320014	0.535	0.325	6.49e-34	5	Aig1
4.47e-38	0.255909	1	0.999	7.22e-34	5	Gng5
1.91e-37	0.364701	0.898	0.754	3.09e-33	5	Cndp2
3.74e-37	0.423968	0.845	0.663	6.05e-33	5	Gatm
3.95e-37	0.287044	1	1	6.38e-33	5	Gapdh
4.71e-37	0.334328	0.948	0.857	7.62e-33	5	Pebp1
7.75e-37	-0.490332	0.757	0.868	1.25e-32	5	Ppp1r15a
1.46e-36	0.36314	0.846	0.677	2.35e-32	5	Atp1a1
4.28e-36	0.363677	0.767	0.58	6.91e-32	5	Eprs
4.31e-36	0.407085	0.489	0.287	6.96e-32	5	Sdc4
1.15e-35	0.364513	0.825	0.647	1.86e-31	5	Dtnbp1
1.32e-35	0.26577	0.997	0.998	2.13e-31	5	Myl6
2.34e-35	0.31504	0.778	0.571	3.79e-31	5	Renbp
2.83e-35	0.280883	0.974	0.933	4.57e-31	5	Ndufa13
3.76e-35	0.287267	0.437	0.247	6.08e-31	5	Sh3bgrl
6.47e-35	0.391389	0.709	0.522	1.05e-30	5	Mapkapk2
1.88e-34	-0.40723	0.94	0.967	3.03e-30	5	Mylip
2.12e-34	0.261635	0.424	0.234	3.43e-30	5	Vps13c
2.24e-34	-0.385509	0.969	0.991	3.62e-30	5	Trf
3.86e-34	0.351227	0.849	0.675	6.24e-30	5	Atxn10
6.35e-34	0.303357	0.96	0.913	1.03e-29	5	Atp5g1
7.53e-34	0.299001	0.836	0.628	1.22e-29	5	Etfb
7.97e-34	0.327888	0.775	0.577	1.29e-29	5	M6pr
1.14e-33	-0.378291	0.807	0.885	1.84e-29	5	Cmtm7
1.91e-33	-0.411632	0.754	0.868	3.08e-29	5	Ssh2
2.22e-33	-0.732777	0.359	0.552	3.59e-29	5	Ccl12
2.6e-33	-0.290231	0.994	0.996	4.2e-29	5	Itgb5
3.4e-33	0.335907	0.907	0.758	5.5e-29	5	Tmem256
5.78e-33	0.331815	0.976	0.944	9.34e-29	5	Pdia3
1.16e-32	0.264591	0.438	0.25	1.87e-28	5	Anxa4
1.64e-32	-0.417063	0.927	0.973	2.64e-28	5	Btg2
1.74e-32	0.339846	0.857	0.695	2.8e-28	5	Vps29
2.87e-32	0.283369	0.994	0.995	4.64e-28	5	Rrbp1
3e-32	0.250935	0.355	0.185	4.85e-28	5	Tmem106a
9.72e-32	0.316209	0.618	0.419	1.57e-27	5	Alas1
1.01e-31	0.323505	0.915	0.814	1.64e-27	5	Ndufb8
1.23e-31	0.398521	0.727	0.542	1.99e-27	5	Hif1a
1.53e-31	0.298607	0.63	0.434	2.48e-27	5	Acaa2
1.74e-31	0.303054	0.691	0.502	2.81e-27	5	Cops6
1.79e-31	0.259979	0.408	0.229	2.89e-27	5	Isyna1
2.28e-31	0.303944	0.969	0.926	3.69e-27	5	Eif5a
2.51e-31	-0.357491	0.977	0.993	4.06e-27	5	Rsrp1
2.66e-31	0.297811	0.889	0.735	4.3e-27	5	Timm13
3.04e-31	0.284663	0.415	0.237	4.92e-27	5	Ckap4
3.87e-31	-0.38234	0.706	0.824	6.25e-27	5	Tanc2
4.02e-31	0.309934	0.89	0.738	6.5e-27	5	Aldh2
4.83e-31	0.344339	0.507	0.318	7.81e-27	5	Capg
1.61e-30	0.434929	0.886	0.78	2.6e-26	5	Emp3
2.23e-30	0.280419	0.98	0.919	3.61e-26	5	Dad1
3.48e-30	-0.306727	0.958	0.984	5.62e-26	5	Cox7a2l
3.61e-30	0.469837	0.402	0.233	5.83e-26	5	Lgals3
3.86e-30	0.300872	0.805	0.627	6.24e-26	5	Commd9
3.99e-30	0.300395	0.68	0.48	6.45e-26	5	Dgkz
4.44e-30	0.322045	0.722	0.546	7.18e-26	5	Rpn1
5.96e-30	-0.267478	0.999	0.999	9.63e-26	5	Man2b1
6.27e-30	0.299466	0.869	0.708	1.01e-25	5	Psmd8
1.2e-29	0.303752	0.589	0.391	1.93e-25	5	Mitf
1.32e-29	-0.374238	0.766	0.852	2.13e-25	5	Ppfia4
2.04e-29	0.302761	0.627	0.436	3.29e-25	5	Amdhd2
3.18e-29	0.292626	0.396	0.223	5.13e-25	5	Cd72
3.56e-29	0.283048	0.731	0.519	5.74e-25	5	Atp6v1a
3.89e-29	-0.426107	0.739	0.845	6.28e-25	5	Itgam
5.24e-29	-0.402209	0.673	0.799	8.46e-25	5	Ccr5
5.51e-29	0.314333	0.599	0.412	8.9e-25	5	Slc37a2
6.62e-29	0.289022	0.7	0.509	1.07e-24	5	Gaa
2.39e-28	0.265185	0.96	0.923	3.86e-24	5	Atp5j
3.46e-28	0.263648	0.972	0.938	5.59e-24	5	Atp5j2
3.82e-28	0.269266	0.736	0.54	6.18e-24	5	Copb2
4.77e-28	0.314937	0.636	0.456	7.7e-24	5	Gng12
4.9e-28	0.278386	0.951	0.873	7.91e-24	5	Uqcr11
5.36e-28	-0.397828	0.831	0.913	8.67e-24	5	Mat2a
8.05e-28	0.289467	0.939	0.857	1.3e-23	5	St13
8.75e-28	0.30695	0.935	0.852	1.41e-23	5	Ehd4
1.11e-27	-0.389738	0.828	0.906	1.8e-23	5	Wsb1
1.14e-27	0.266417	0.608	0.401	1.84e-23	5	Gla
1.84e-27	-0.425655	0.752	0.849	2.97e-23	5	Cited2
2.29e-27	-0.322252	0.886	0.934	3.7e-23	5	Vsir
2.46e-27	0.280557	0.98	0.887	3.97e-23	5	Uqcrq
2.54e-27	0.251677	0.986	0.95	4.1e-23	5	Atp5b
3.22e-27	0.301752	0.671	0.494	5.19e-23	5	Hpf1
3.33e-27	0.270248	0.999	0.985	5.38e-23	5	Pkm
4.46e-27	0.296279	0.804	0.64	7.2e-23	5	Akr1b3
5.63e-27	0.263919	0.438	0.269	9.1e-23	5	Cpt1a
1.12e-26	0.269227	0.913	0.81	1.81e-22	5	Psma7
1.24e-26	0.280781	0.785	0.614	2.01e-22	5	Tbcb
1.71e-26	0.303687	0.912	0.838	2.76e-22	5	Colgalt1
1.88e-26	0.282451	0.88	0.748	3.03e-22	5	Minos1
2.15e-26	-0.5553	0.44	0.59	3.47e-22	5	Il1a
2.57e-26	-0.399863	0.809	0.872	4.16e-22	5	Arhgap5
2.65e-26	0.266538	0.954	0.885	4.27e-22	5	Cox5a
3.01e-26	0.26862	0.496	0.323	4.86e-22	5	Plekha1
3.6e-26	0.29839	0.91	0.821	5.81e-22	5	Lrp1
5.38e-26	0.297773	0.682	0.511	8.69e-22	5	Lpcat1
6.51e-26	0.282635	0.912	0.778	1.05e-21	5	H2afj
8.82e-26	0.275347	0.866	0.727	1.43e-21	5	Atp5o.1
1.39e-25	0.29786	0.624	0.447	2.25e-21	5	Fxyd5
1.67e-25	0.314883	0.936	0.873	2.7e-21	5	Pgam1
1.72e-25	-0.370153	0.396	0.559	2.78e-21	5	Adgrg1
1.88e-25	0.288673	0.917	0.803	3.04e-21	5	Uqcr10
2.66e-25	-0.353251	0.873	0.933	4.3e-21	5	Tgfbr1
3.39e-25	0.252773	0.494	0.321	5.48e-21	5	Ahcyl1
6.7e-25	-0.378133	0.627	0.726	1.08e-20	5	Ivns1abp
8.35e-25	-0.342428	0.207	0.379	1.35e-20	5	Asb2
1.17e-24	-0.37424	0.837	0.905	1.89e-20	5	Ppp1r10
2.14e-24	-0.282993	0.978	0.992	3.45e-20	5	Kctd12
2.83e-24	0.252925	0.631	0.446	4.57e-20	5	Plin3
2.84e-24	-0.313391	0.932	0.957	4.59e-20	5	Btg1
2.92e-24	0.267728	0.939	0.856	4.71e-20	5	Pon2
5.55e-24	0.347943	0.726	0.559	8.96e-20	5	Sdf2l1
1.25e-23	0.284289	0.62	0.446	2.02e-19	5	Nrp2
1.77e-23	-2.18898	0.398	0.518	2.86e-19	5	Ftl1-ps1
1.81e-23	0.258933	0.534	0.362	2.93e-19	5	Slc23a2
2.39e-23	0.281317	0.881	0.745	3.86e-19	5	Dhrs3
3.15e-23	0.318573	0.848	0.727	5.09e-19	5	Atp5k
3.55e-23	0.277441	0.962	0.921	5.74e-19	5	Eno1
4.02e-23	0.267988	0.782	0.616	6.49e-19	5	Atp6v1b2
6.95e-23	0.278298	0.985	0.975	1.12e-18	5	mt-Nd4l
7.07e-23	-0.282066	0.999	0.999	1.14e-18	5	Malat1
7.34e-23	0.280047	0.973	0.954	1.19e-18	5	Bcl2a1b
8.35e-23	0.264913	0.855	0.725	1.35e-18	5	Atp5g3
1.07e-22	-0.32323	0.917	0.952	1.72e-18	5	Fus
1.14e-22	0.261086	0.721	0.564	1.85e-18	5	Psmd2
1.23e-22	0.348435	0.647	0.491	1.99e-18	5	Phgdh
2.16e-22	0.260215	0.78	0.624	3.49e-18	5	Mydgf
2.46e-22	0.267621	0.971	0.964	3.98e-18	5	Bri3
2.57e-22	-0.25662	0.976	0.991	4.15e-18	5	Pabpc1
3.34e-22	-0.263365	0.98	0.985	5.4e-18	5	Fyb
3.86e-22	-0.298738	0.695	0.793	6.24e-18	5	Retreg1
3.88e-22	0.257805	0.935	0.841	6.28e-18	5	Cox7b
6.31e-22	-0.378673	0.758	0.845	1.02e-17	5	Pmepa1
6.7e-22	0.254101	0.827	0.689	1.08e-17	5	Map2k2
7.68e-22	0.264142	0.862	0.704	1.24e-17	5	Cd83
7.96e-22	0.257706	0.858	0.726	1.29e-17	5	0610012G03Rik
1.09e-21	0.269009	0.732	0.583	1.77e-17	5	Napa
1.47e-21	0.258248	0.875	0.747	2.38e-17	5	Tmed3
1.81e-21	-0.33782	0.917	0.948	2.93e-17	5	Srsf2
2.12e-21	0.269436	0.877	0.769	3.43e-17	5	Aprt
2.2e-21	0.27391	0.798	0.658	3.55e-17	5	Bola2
2.35e-21	-0.344646	0.75	0.834	3.79e-17	5	Hpgd
3.1e-21	-0.344718	0.716	0.79	5.01e-17	5	Nrip1
4.49e-21	-0.33735	0.677	0.78	7.26e-17	5	Ecscr
5.44e-21	0.25007	0.793	0.626	8.79e-17	5	Ninj1
5.49e-21	-0.386301	0.344	0.496	8.87e-17	5	Cebpd
8.01e-21	-0.321363	0.994	0.998	1.29e-16	5	Cx3cr1
9.73e-21	0.258689	0.752	0.586	1.57e-16	5	Cct3
1.02e-20	0.261762	0.571	0.407	1.65e-16	5	Ramp1
1.25e-20	-0.268434	0.876	0.935	2.02e-16	5	Bin2
2.59e-20	-0.339528	0.691	0.779	4.18e-16	5	Zfp36l2
2.76e-20	0.253255	0.827	0.687	4.47e-16	5	Ndufs5
3.35e-20	-0.274093	0.871	0.913	5.41e-16	5	Fam105a
3.65e-20	0.262991	0.809	0.659	5.9e-16	5	Ndufc1
5.93e-20	-0.336685	0.931	0.97	9.58e-16	5	Rhob
6.71e-20	0.259563	0.789	0.643	1.08e-15	5	Asph
8.88e-20	-0.29304	0.813	0.876	1.44e-15	5	Bmp2k
9.43e-20	0.264812	0.819	0.692	1.52e-15	5	Cuedc2
9.74e-20	0.266266	0.798	0.643	1.57e-15	5	Ssr2
1.87e-19	-0.307152	0.661	0.763	3.03e-15	5	Ntpcr
1.88e-19	0.252378	0.768	0.624	3.04e-15	5	Sgpl1
3.05e-19	-0.319677	0.38	0.521	4.92e-15	5	St3gal6
3.23e-19	-0.2885	0.744	0.793	5.21e-15	5	Fgd2
3.38e-19	0.251492	0.649	0.506	5.47e-15	5	Hsd17b12
4.05e-19	-0.291841	0.79	0.856	6.55e-15	5	Slco2b1
1.11e-18	0.268491	0.703	0.565	1.8e-14	5	Soat1
1.27e-18	-0.29442	0.973	0.987	2.05e-14	5	Mafb
1.28e-18	0.251587	0.73	0.588	2.07e-14	5	Fuca2
1.42e-18	-0.295057	0.781	0.857	2.29e-14	5	Srgap2
2.03e-18	0.266902	0.761	0.625	3.27e-14	5	Dnajb11
2.43e-18	-0.32664	0.891	0.924	3.92e-14	5	Dynll1
2.9e-18	-0.256881	0.954	0.98	4.69e-14	5	Glul
3.87e-18	-0.324484	0.764	0.854	6.25e-14	5	Zfp36
4.81e-18	0.27411	0.854	0.754	7.77e-14	5	Gas6
4.85e-18	-0.256911	0.972	0.976	7.84e-14	5	Eif5
6.17e-18	-0.272579	0.836	0.896	9.96e-14	5	Ptprc
9.65e-18	-0.296944	0.7	0.777	1.56e-13	5	Pde3b
1.28e-17	-0.256661	0.926	0.952	2.06e-13	5	Wnk1
1.3e-17	-0.334154	0.956	0.971	2.1e-13	5	Ier3
1.8e-17	-0.37715	0.604	0.719	2.91e-13	5	Neurl3
2.62e-17	-0.275292	0.945	0.964	4.23e-13	5	Hnrnpa2b1
4.09e-17	-0.346903	0.956	0.976	6.61e-13	5	Jun
5.15e-17	-0.283258	0.799	0.899	8.31e-13	5	Tmem176b
6.38e-17	-0.323537	0.784	0.84	1.03e-12	5	Zfp36l1
9.72e-17	-0.279826	0.729	0.789	1.57e-12	5	Adap2
1.07e-16	-0.264901	0.75	0.828	1.72e-12	5	Frmd4a
1.09e-16	0.288518	0.926	0.904	1.76e-12	5	Ldha
1.9e-16	-0.277703	0.731	0.795	3.08e-12	5	Slc29a3
2.57e-16	-0.300895	0.57	0.656	4.15e-12	5	Dock10
3.97e-16	0.252042	0.722	0.582	6.41e-12	5	Hspd1
4.99e-16	-0.420976	0.52	0.611	8.06e-12	5	Tmsb10
5.2e-16	-0.356834	0.734	0.787	8.4e-12	5	Ube2s
6.56e-16	-0.260134	0.698	0.772	1.06e-11	5	Pold4
6.9e-16	-0.281095	0.195	0.323	1.12e-11	5	Slc2a5
1.55e-15	-0.27544	0.818	0.866	2.51e-11	5	Atf4
2.33e-15	-0.312435	0.722	0.782	3.76e-11	5	Brd2
3.24e-15	-0.323243	0.525	0.612	5.23e-11	5	Hexim1
4.63e-15	-0.277957	0.392	0.506	7.47e-11	5	Fbrsl1
5.1e-15	-0.260337	0.714	0.803	8.23e-11	5	Lsp1
2.18e-14	-0.292481	0.485	0.588	3.53e-10	5	Camk2n1
3.2e-14	-0.290399	0.828	0.901	5.18e-10	5	Icam1
6.13e-14	-0.438334	0.423	0.538	9.91e-10	5	Dusp2
7.28e-14	-0.318625	0.438	0.538	1.18e-09	5	Adrb2
2.22e-13	-0.293119	0.743	0.837	3.59e-09	5	Dusp1
5.39e-13	-0.435219	0.586	0.667	8.71e-09	5	Crybb1
6.74e-13	-0.27143	0.641	0.71	1.09e-08	5	Txnip
8.13e-13	-0.266633	0.753	0.815	1.31e-08	5	Rbbp6
1.9e-12	-0.310226	0.552	0.627	3.06e-08	5	Ddit3
2.08e-12	0.258039	0.435	0.309	3.35e-08	5	Cdkn1a
3.28e-12	-0.33593	0.907	0.944	5.3e-08	5	Klf2
1.03e-11	-0.252248	0.554	0.629	1.67e-07	5	Il10ra
1.06e-11	-0.353823	0.32	0.419	1.71e-07	5	Nav3
2.61e-11	-0.259865	0.793	0.816	4.21e-07	5	Slc38a2
3.21e-11	-0.261195	0.904	0.943	5.18e-07	5	Ier2
4.01e-11	-0.273486	0.611	0.683	6.47e-07	5	Sertad1
4.66e-11	-0.260323	0.446	0.538	7.52e-07	5	Herpud1
6.63e-11	-0.29278	0.56	0.617	1.07e-06	5	Tsc22d3
1.07e-10	-0.250021	0.928	0.958	1.73e-06	5	Nfkbia
1.28e-10	-0.2775	0.595	0.651	2.07e-06	5	Dnajb9
2.75e-10	-0.324379	0.75	0.793	4.45e-06	5	Ltc4s
1.05e-09	-0.260293	0.927	0.955	1.69e-05	5	Fos
2.71e-08	-0.255916	0.383	0.466	0.000438	5	Marcksl1
4.81e-08	-0.264674	0.588	0.635	0.000777	5	Snhg12
7.76e-08	-0.298839	0.536	0.594	0.00125432	5	Klf4
1.41e-06	-0.256643	0.481	0.537	0.0227468	5	Alox5ap
2.72e-06	-0.427449	0.757	0.842	0.0439344	5	Ccl4
4.94e-06	-0.268813	0.195	0.259	0.0797268	5	Hes1
1.43e-05	-0.547837	0.124	0.183	0.231727	5	Il1b
5.86e-05	-0.308806	0.68	0.696	0.947458	5	Hmgb2
0.00014	-0.313147	0.239	0.29	1	5	Hspa1a
1.95e-261	2.13679	1	1	3.15e-257	6	Fth1
1.12e-214	2.27084	0.769	0.297	1.82e-210	6	Gclm
1.21e-203	3.81431	0.952	0.745	1.96e-199	6	Hmox1
4.38e-179	1.51156	0.941	0.726	7.07e-175	6	Blvrb
1.12e-159	0.277173	0.132	0.007	1.8e-155	6	Treml4
6.2e-156	1.25384	0.998	0.996	1e-151	6	Creg1
2.28e-151	1.193	0.766	0.374	3.69e-147	6	Slc48a1
9.68e-139	1.23597	0.919	0.739	1.56e-134	6	Aldh2
3.29e-138	1.79438	0.621	0.225	5.32e-134	6	Lgals3
1.23e-137	0.834329	0.297	0.051	1.98e-133	6	Srxn1
1.03e-135	1.80936	0.993	0.973	1.67e-131	6	Prdx1
1.13e-124	1.1301	0.942	0.782	1.82e-120	6	Lipa
1.77e-122	1.49972	0.949	0.785	2.85e-118	6	Lpl
3.87e-122	1.19811	0.985	0.952	6.25e-118	6	Taldo1
2.48e-121	0.324404	0.117	0.008	4e-117	6	Uchl1
4.85e-115	0.491	0.35	0.08	7.83e-111	6	Gstm1
9.09e-107	0.787269	0.565	0.218	1.47e-102	6	Gsr
2.78e-104	0.496347	0.119	0.01	4.49e-100	6	Slc7a11
1.63e-101	-0.541779	1	1	2.63e-97	6	Csf1r
1.7e-100	1.11792	0.852	0.656	2.74e-96	6	Txn1
3.45e-98	-0.522291	1	1	5.58e-94	6	Cst3
3.29e-97	0.433476	0.166	0.022	5.31e-93	6	Lilr4b
3.67e-95	-0.461045	0.998	1	5.92e-91	6	Hexb
5.23e-95	-0.505479	1	1	8.45e-91	6	Ctss
1.13e-88	1.20352	0.553	0.237	1.83e-84	6	Lgals1
6.78e-88	0.903115	0.455	0.163	1.1e-83	6	Vim
3.4e-87	0.519234	0.134	0.016	5.49e-83	6	Gpnmb
7.42e-85	-0.593464	0.995	1	1.2e-80	6	Sparc
1.01e-84	-0.843357	0.788	0.953	1.62e-80	6	Lag3
6.05e-84	0.94392	0.874	0.702	9.78e-80	6	Cyb5a
1.21e-81	1.85642	0.608	0.303	1.96e-77	6	Cdkn1a
3.47e-81	1.1117	0.786	0.507	5.61e-77	6	Igf1
1.23e-78	-0.475572	1	1	1.98e-74	6	Rps27
2.11e-78	0.675304	0.399	0.136	3.4e-74	6	Pla2g7
1.28e-77	0.421325	0.326	0.092	2.06e-73	6	Shtn1
4.41e-73	0.570283	0.382	0.129	7.13e-69	6	Iqgap1
6.85e-73	0.943924	0.657	0.377	1.11e-68	6	Txnrd1
1.28e-69	0.866742	0.772	0.523	2.07e-65	6	Alox5ap
1.25e-68	0.447368	0.273	0.074	2.01e-64	6	Lilrb4a
1.2e-67	-0.355272	1	1	1.95e-63	6	Rps29
2.01e-67	0.795355	0.774	0.536	3.25e-63	6	Anxa5
4.74e-67	-0.346853	1	1	7.66e-63	6	C1qc
2.17e-66	0.722635	0.606	0.316	3.51e-62	6	Capg
4.15e-63	-0.340031	1	1	6.71e-59	6	Rpl21
6.38e-63	0.488608	0.411	0.16	1.03e-58	6	Dab2
8.7e-63	-0.690634	0.683	0.896	1.4e-58	6	Siglech
2.08e-61	0.659343	0.912	0.802	3.35e-57	6	Slc11a1
2.64e-61	0.713706	0.489	0.23	4.26e-57	6	Serpinb6a
2.08e-59	0.470598	0.407	0.162	3.36e-55	6	Rnf128
3.46e-58	0.500881	0.458	0.192	5.59e-54	6	Rab7b
5.71e-58	0.33801	0.212	0.053	9.22e-54	6	Ifi207
9.59e-58	0.431686	1	1	1.55e-53	6	Hsp90ab1
5.33e-57	0.257984	0.222	0.058	8.61e-53	6	Tfec
7.98e-56	1.11571	0.686	0.472	1.29e-51	6	Slc40a1
1.21e-55	-0.424042	0.988	0.998	1.96e-51	6	Unc93b1
6.43e-55	-0.504762	0.985	1	1.04e-50	6	Ly86
6.89e-55	0.71011	0.929	0.79	1.11e-50	6	Plin2
3.21e-54	0.481336	0.513	0.256	5.18e-50	6	Cat
3.4e-54	-0.6669	0.854	0.969	5.5e-50	6	P2ry12
3.44e-53	0.384433	0.197	0.051	5.56e-49	6	Afp
9.48e-53	0.788146	0.898	0.761	1.53e-48	6	Cstb
1.44e-51	-0.294775	1	1	2.33e-47	6	C1qb
3.68e-51	0.389909	0.323	0.118	5.95e-47	6	2010111I01Rik
4.77e-51	-0.450929	0.946	0.996	7.71e-47	6	Serinc3
6.53e-51	2.5695	0.723	0.502	1.05e-46	6	Ftl1-ps1
4.55e-50	0.427871	0.99	0.97	7.34e-46	6	Akr1a1
3.38e-48	-0.444921	0.934	0.994	5.46e-44	6	Pld4
3.49e-48	-0.42479	0.964	0.997	5.64e-44	6	Itgb5
4.37e-48	-0.305195	1	1	7.06e-44	6	Rps21
2.16e-47	-0.276752	1	1	3.49e-43	6	Fau
2.32e-47	-0.433622	0.99	0.999	3.75e-43	6	Fcrls
3.04e-47	-0.489737	0.879	0.975	4.91e-43	6	Lpcat2
4.5e-47	-0.412715	0.992	0.997	7.26e-43	6	Ldhb
1.35e-46	0.364771	0.355	0.144	2.19e-42	6	Tmem205
4.96e-46	0.556949	0.813	0.627	8.02e-42	6	Ninj1
1.94e-45	0.518806	0.891	0.77	3.14e-41	6	Aprt
3.88e-45	0.61045	0.514	0.279	6.26e-41	6	Sash1
5.18e-45	-0.297848	1	1	8.36e-41	6	Rps9
8.57e-45	0.538969	0.864	0.72	1.38e-40	6	Psma3
9.72e-45	-0.356238	0.98	1	1.57e-40	6	Marcks
1.64e-44	0.302206	0.265	0.092	2.65e-40	6	Angptl4
7.89e-44	0.835393	0.572	0.347	1.27e-39	6	Prdx6
1.85e-43	-0.828756	0.416	0.673	2.99e-39	6	Crybb1
3.11e-43	-0.297959	1	1	5.02e-39	6	Rps7
4.86e-43	0.625582	0.913	0.78	7.85e-39	6	Emp3
6.88e-43	-0.593764	0.681	0.848	1.11e-38	6	Pmepa1
6.62e-42	0.69491	0.84	0.718	1.07e-37	6	Sqstm1
7.5e-42	0.455528	0.511	0.282	1.21e-37	6	Htatip2
1.09e-41	-0.53797	0.452	0.703	1.76e-37	6	Cd34
1.12e-41	0.446859	0.968	0.954	1.81e-37	6	Atpif1
2.39e-41	-0.310591	1	1	3.87e-37	6	Rpl39
3.15e-41	0.441607	0.506	0.277	5.09e-37	6	G6pdx
3.32e-41	-0.41516	0.937	0.989	5.37e-37	6	Serpine2
1.25e-40	0.472421	0.992	0.974	2.02e-36	6	Aldoa
1.76e-40	-0.464011	0.951	0.991	2.84e-36	6	Trf
1.81e-40	0.54499	0.632	0.406	2.93e-36	6	C5ar1
1.42e-39	-0.278736	1	1	2.3e-35	6	Rpl10a
2.44e-39	1.00017	0.844	0.739	3.95e-35	6	Esd
3.12e-39	-0.380091	0.988	0.999	5.04e-35	6	Man2b1
1.45e-38	-0.457629	0.754	0.883	2.34e-34	6	Ctsf
3.54e-38	0.604933	0.788	0.66	5.72e-34	6	Pgd
8.23e-38	-0.251433	1	1	1.33e-33	6	Rpl18a
2.63e-37	0.582697	0.888	0.813	4.25e-33	6	Psma7
3.71e-37	-0.513748	0.779	0.909	5.99e-33	6	Selplg
2.61e-36	0.320546	1	0.999	4.21e-32	6	Serf2
3.02e-36	0.52854	0.846	0.734	4.88e-32	6	Tspo
3.6e-36	-0.384269	0.937	0.991	5.82e-32	6	Epb41l2
5.07e-36	-0.492615	0.667	0.811	8.2e-32	6	H2-DMa
6.49e-36	0.446719	0.479	0.262	1.05e-31	6	Vat1
8.09e-36	0.523147	0.885	0.754	1.31e-31	6	Gas6
2.04e-35	-0.261277	1	1	3.29e-31	6	C1qa
2.52e-35	0.486023	0.856	0.737	4.08e-31	6	Csf2ra
2.6e-35	0.406257	0.939	0.861	4.2e-31	6	Reep5
3.43e-35	-0.47405	0.708	0.845	5.54e-31	6	Golm1
4.31e-35	0.383154	0.397	0.198	6.96e-31	6	Gsn
5.01e-35	-0.256479	1	1	8.1e-31	6	Rpl30
6.22e-35	0.471263	0.854	0.711	1.01e-30	6	Pdlim4
8.51e-35	0.305283	0.302	0.129	1.38e-30	6	Cd44
8.59e-35	0.306212	1	1	1.39e-30	6	Cyba
1.45e-34	-0.434305	0.862	0.949	2.35e-30	6	Ptgs1
3.19e-34	-0.317339	0.99	0.999	5.15e-30	6	Rpl36a
1.75e-33	-0.42199	0.886	0.969	2.83e-29	6	Pou2f2
1.94e-33	-0.256	1	1	3.13e-29	6	Rpl37
3.87e-33	0.47194	0.616	0.404	6.26e-29	6	Gla
4.19e-33	0.35863	0.458	0.255	6.77e-29	6	Glrx
3.72e-32	-0.437269	0.699	0.853	6.01e-28	6	Ppfia4
4.5e-32	-0.251606	1	1	7.26e-28	6	Rps11
1.14e-31	0.44961	0.649	0.448	1.84e-27	6	Nrp2
1.28e-31	0.383918	0.26	0.108	2.06e-27	6	Ccl24
3.43e-31	-0.384979	0.997	0.999	5.55e-27	6	Selenop
3.56e-31	0.405027	0.903	0.813	5.75e-27	6	Tkt
3.66e-31	0.427046	0.666	0.448	5.91e-27	6	Fxyd5
4.15e-31	-0.472645	0.774	0.902	6.71e-27	6	Icam1
4.35e-31	0.412122	0.939	0.883	7.03e-27	6	Ndufa4
8.1e-31	0.411083	0.854	0.73	1.31e-26	6	Rps27l
2.25e-30	-0.421742	0.908	0.973	3.63e-26	6	Btg2
2.46e-30	-0.318797	0.978	0.996	3.97e-26	6	Ctsh
4.1e-30	-0.411272	0.958	0.995	6.62e-26	6	Junb
5.33e-30	-0.465146	0.604	0.782	8.62e-26	6	Ecscr
6.16e-30	0.414299	0.72	0.55	9.96e-26	6	Sod1
7.09e-30	0.412098	0.878	0.796	1.14e-25	6	1110008F13Rik
9e-30	-0.457615	0.54	0.726	1.45e-25	6	Slc12a2
1.91e-29	-0.453759	0.666	0.847	3.08e-25	6	Itgam
2.33e-29	0.311392	0.489	0.285	3.76e-25	6	Rit1
3.69e-29	0.437651	0.925	0.865	5.97e-25	6	Psmb6
1.92e-28	0.296301	0.292	0.134	3.1e-24	6	Slc39a4
2.28e-28	-0.351498	0.961	0.994	3.68e-24	6	Olfml3
3.81e-28	-0.472562	0.708	0.857	6.16e-24	6	Tmem176a
4.4e-28	-0.415605	0.757	0.9	7.1e-24	6	Tmem176b
5.65e-28	0.415853	0.766	0.598	9.13e-24	6	Psmd7
2.62e-27	0.375405	0.567	0.364	4.23e-23	6	Flna
3.15e-27	0.383963	0.469	0.287	5.08e-23	6	Por
6.15e-27	-0.379143	0.73	0.858	9.93e-23	6	Slco2b1
9.95e-27	0.310442	0.357	0.187	1.61e-22	6	Lmna
3.73e-26	0.327722	0.358	0.191	6.03e-22	6	Gabarapl1
4.97e-26	-0.287511	0.968	0.994	8.03e-22	6	Qk
6.86e-26	-0.419715	0.608	0.8	1.11e-21	6	Ccr5
8.36e-26	-0.279644	0.981	0.996	1.35e-21	6	Son
1.87e-25	-0.392475	0.761	0.868	3.02e-21	6	Hk2
2.26e-25	-0.360515	0.458	0.657	3.65e-21	6	Samsn1
9.66e-25	-0.416749	0.57	0.741	1.56e-20	6	Cryba4
9.8e-25	0.43511	0.769	0.647	1.58e-20	6	Psma5
1.71e-24	-0.40732	0.772	0.873	2.77e-20	6	Arhgap5
3.75e-24	0.323043	0.981	0.961	6.06e-20	6	Gpx4
3.79e-24	-0.284193	0.975	0.991	6.12e-20	6	Pabpc1
4.1e-24	-0.356922	0.649	0.798	6.62e-20	6	Slc29a3
4.33e-24	-0.36558	0.691	0.83	6.99e-20	6	Frmd4a
7.58e-24	-0.348088	0.873	0.948	1.23e-19	6	Ly6e
1.85e-23	0.405151	0.856	0.782	2.99e-19	6	Cd84
2.02e-23	-0.558542	0.508	0.678	3.26e-19	6	Tmem119
2.56e-23	0.292047	0.492	0.314	4.14e-19	6	Anxa7
4.04e-23	0.933481	0.786	0.668	6.53e-19	6	Fabp5
6.67e-23	-0.377232	0.362	0.558	1.08e-18	6	Adgrg1
9.8e-23	0.299466	0.419	0.251	1.58e-18	6	Sh3bp5
1.11e-22	-0.379978	1	1	1.79e-18	6	Apoe
1.15e-22	0.316696	0.985	0.981	1.86e-18	6	Hint1
1.23e-22	0.41505	0.783	0.629	1.99e-18	6	Cebpb
1.29e-22	-0.318912	0.776	0.882	2.08e-18	6	Lmo2
1.42e-22	0.405469	0.565	0.401	2.29e-18	6	Glipr1
2.62e-22	-0.376705	0.426	0.621	4.23e-18	6	Spint1
4.06e-22	-0.379507	0.671	0.798	6.56e-18	6	Cadm1
6.43e-22	0.263092	0.998	0.999	1.04e-17	6	Cd63
7.48e-22	0.282758	0.99	0.981	1.21e-17	6	Atox1
7.87e-22	0.255919	0.409	0.238	1.27e-17	6	Tagln2
8.06e-22	0.308379	0.849	0.757	1.3e-17	6	Pitpna
1.16e-21	-0.303575	0.891	0.959	1.87e-17	6	Btg1
1.83e-21	-0.25053	0.988	0.999	2.96e-17	6	Aif1
2.34e-21	-0.365042	0.864	0.945	3.78e-17	6	Ier2
3.03e-21	0.357141	0.716	0.59	4.89e-17	6	Txnl1
4.14e-21	0.34982	0.474	0.309	6.69e-17	6	Tnfaip2
4.62e-21	-0.333021	0.762	0.866	7.47e-17	6	Ssh2
1.06e-20	0.272698	0.601	0.427	1.71e-16	6	Pdcd6
1.37e-20	0.298987	0.981	0.979	2.21e-16	6	Ucp2
1.96e-20	1.30495	0.959	0.986	3.16e-16	6	Ftl1
2.47e-20	-0.271697	0.92	0.968	3.99e-16	6	Eif3f
2.48e-20	-0.604304	0.36	0.539	4e-16	6	Dusp2
2.56e-20	0.331936	0.722	0.578	4.13e-16	6	1810058I24Rik
2.78e-20	0.278777	0.582	0.407	4.49e-16	6	App
2.98e-20	0.435712	0.538	0.383	4.81e-16	6	Gclc
4.65e-20	-0.328566	0.501	0.676	7.51e-16	6	Herc2
5.85e-20	0.350978	0.74	0.581	9.45e-16	6	Stab1
7.92e-20	0.317073	0.806	0.672	1.28e-15	6	Cd300a
9.99e-20	0.263135	0.267	0.139	1.61e-15	6	Ell2
1.29e-19	0.343681	0.608	0.459	2.09e-15	6	Card19
1.42e-19	-0.345329	0.705	0.822	2.29e-15	6	Tanc2
1.57e-19	-0.267737	0.958	0.983	2.54e-15	6	Cox7a2l
1.89e-19	-0.321567	0.66	0.804	3.05e-15	6	Lsp1
1.98e-19	-0.271205	0.903	0.947	3.2e-15	6	Evi2a
2.19e-19	0.333781	0.628	0.477	3.54e-15	6	Psmd1
3.1e-19	0.278724	0.939	0.89	5.01e-15	6	Tmed10
4.08e-19	-0.33223	0.666	0.774	6.59e-15	6	Abcg1
5.87e-19	0.388874	0.621	0.48	9.49e-15	6	Nceh1
6.75e-19	0.289015	0.796	0.661	1.09e-14	6	Bst2
6.92e-19	0.415718	0.708	0.586	1.12e-14	6	Eprs
7.71e-19	0.288485	0.812	0.696	1.24e-14	6	Ap2m1
8.04e-19	-0.277339	0.932	0.991	1.3e-14	6	Egr1
9.13e-19	0.291028	0.368	0.224	1.48e-14	6	Ccng1
1.05e-18	-0.32597	0.862	0.933	1.69e-14	6	Tgfbr1
1.46e-18	0.348782	0.511	0.362	2.36e-14	6	Msrb1
1.54e-18	0.340356	0.817	0.733	2.49e-14	6	Dbi
2.01e-18	-0.282614	0.998	0.999	3.24e-14	6	Gm42418
2.03e-18	-0.330994	0.36	0.541	3.28e-14	6	Herpud1
2.43e-18	0.269439	0.448	0.288	3.93e-14	6	Anxa2
3.63e-18	0.336759	0.93	0.891	5.86e-14	6	Vcp
5.32e-18	-0.299674	0.866	0.921	8.59e-14	6	F11r
5.48e-18	-0.302659	0.81	0.881	8.85e-14	6	Oxct1
7.91e-18	0.400304	0.806	0.74	1.28e-13	6	Psmb5
8.58e-18	0.338959	0.829	0.73	1.39e-13	6	Psma2
1e-17	-0.312264	0.599	0.733	1.62e-13	6	Slc16a6
1.15e-17	-0.322304	0.209	0.377	1.86e-13	6	Asb2
1.76e-17	-0.250909	0.919	0.954	2.84e-13	6	Fam49b
3.24e-17	0.306267	0.706	0.575	5.24e-13	6	Tmem167
4.42e-17	-0.270463	0.81	0.889	7.13e-13	6	Daglb
5.4e-17	-0.275908	0.65	0.797	8.72e-13	6	Fgd2
5.55e-17	-0.305492	0.402	0.563	8.96e-13	6	Rasal3
1.48e-16	-0.251786	0.952	0.992	2.39e-12	6	Gpr34
1.54e-16	-0.446421	0.818	0.867	2.48e-12	6	Tpi1
1.55e-16	-0.287495	0.497	0.653	2.51e-12	6	Fcgr2b
1.62e-16	0.300398	0.543	0.404	2.62e-12	6	Ywhag
2.38e-16	0.251271	0.385	0.246	3.85e-12	6	Pla2g4a
2.75e-16	0.2724	0.626	0.468	4.43e-12	6	Acadl
2.76e-16	-0.27355	0.912	0.958	4.46e-12	6	Tmem86a
4.25e-16	0.253488	0.521	0.366	6.87e-12	6	Map2k3
5.48e-16	0.294173	0.431	0.284	8.86e-12	6	Ifitm2
5.8e-16	-0.287868	0.696	0.79	9.37e-12	6	Nrip1
6.54e-16	-0.320704	0.642	0.761	1.06e-11	6	Smad7
7.14e-16	-0.459368	0.43	0.589	1.15e-11	6	Il1a
8.74e-16	0.252514	0.968	0.941	1.41e-11	6	Atp6v0e
9.05e-16	0.322295	0.798	0.733	1.46e-11	6	Psmb3
9.73e-16	0.309224	0.632	0.504	1.57e-11	6	Fkbp1a
1.12e-15	0.261255	0.593	0.448	1.81e-11	6	Dap
1.15e-15	0.318129	0.684	0.568	1.85e-11	6	Psmd2
1.6e-15	-0.271811	0.837	0.912	2.59e-11	6	Mat2a
2.18e-15	-0.284505	0.725	0.825	3.53e-11	6	Lap3
2.92e-15	0.257865	0.795	0.693	4.72e-11	6	Txndc17
3.07e-15	0.27852	0.847	0.758	4.95e-11	6	Cndp2
3.76e-15	0.252833	0.913	0.857	6.08e-11	6	Capns1
4.44e-15	0.311819	0.674	0.549	7.18e-11	6	Rhoc
7.43e-15	0.287908	0.937	0.882	1.2e-10	6	C3ar1
7.53e-15	-0.285047	0.659	0.777	1.22e-10	6	Pde3b
8.68e-15	0.298691	0.657	0.525	1.4e-10	6	Atp6v1a
8.98e-15	0.297303	0.973	0.954	1.45e-10	6	Bcl2a1b
1.11e-14	-0.28332	0.448	0.59	1.8e-10	6	9930111J21Rik2
1.14e-14	-0.271199	0.65	0.753	1.84e-10	6	Tmcc3
1.28e-14	-0.34293	0.438	0.569	2.07e-10	6	Scd2
1.55e-14	0.251074	0.942	0.906	2.5e-10	6	Cox5b
1.59e-14	-0.256075	0.774	0.884	2.56e-10	6	Purb
1.59e-14	0.374182	0.81	0.713	2.57e-10	6	Psmd8
2.39e-14	0.283735	0.511	0.37	3.86e-10	6	Mdm2
2.45e-14	0.260645	0.789	0.686	3.95e-10	6	Ssu72
3.15e-14	0.275219	0.786	0.706	5.09e-10	6	Cap1
4.01e-14	-0.370105	0.613	0.717	6.48e-10	6	Neurl3
4.13e-14	0.305227	0.793	0.707	6.67e-10	6	Nme1
4.25e-14	-0.251986	0.919	0.954	6.87e-10	6	Srsf3
6.08e-14	0.253527	0.856	0.79	9.83e-10	6	Ndufb9
6.69e-14	-0.253192	0.29	0.441	1.08e-09	6	Tmem173
8.69e-14	0.267791	0.642	0.524	1.4e-09	6	Rex1bd
1.27e-13	-0.277931	0.849	0.921	2.06e-09	6	Skil
1.28e-13	0.335307	0.706	0.627	2.07e-09	6	Ms4a6d
1.32e-13	-0.292989	0.346	0.492	2.14e-09	6	Slamf9
1.36e-13	-0.306165	0.387	0.52	2.19e-09	6	Pfkl
1.59e-13	-0.275716	0.472	0.6	2.57e-09	6	Cxxc5
2.4e-13	-0.265908	0.228	0.368	3.88e-09	6	Col27a1
2.4e-13	-0.261865	0.718	0.816	3.88e-09	6	Sall1
2.68e-13	-0.294374	0.34	0.473	4.33e-09	6	Egln1
3.44e-13	-0.470502	0.399	0.547	5.55e-09	6	Ccl12
4.25e-13	-0.268259	0.581	0.692	6.87e-09	6	Naglu
5.07e-13	0.270172	0.793	0.738	8.18e-09	6	Psmb2
6.07e-13	-0.259093	0.273	0.412	9.81e-09	6	Nfix
1.08e-12	-0.424596	0.9	0.928	1.74e-08	6	Mif
1.26e-12	0.251823	0.273	0.165	2.03e-08	6	Fam20c
1.58e-12	-0.274918	0.375	0.506	2.55e-08	6	Fbrsl1
1.91e-12	-0.25114	0.587	0.684	3.08e-08	6	Sipa1
2.23e-12	0.303354	0.686	0.568	3.6e-08	6	Soat1
2.5e-12	-0.281781	0.64	0.724	4.05e-08	6	Ivns1abp
2.72e-12	-0.268931	0.492	0.619	4.39e-08	6	Tsc22d3
3.5e-12	-0.272136	0.418	0.532	5.66e-08	6	Rgl2
3.67e-12	0.28437	0.827	0.765	5.93e-08	6	Psmb4
3.81e-12	0.303419	0.73	0.6	6.16e-08	6	Tmsb10
3.88e-12	-0.250423	0.912	0.952	6.27e-08	6	Fus
4.36e-12	-0.282446	0.219	0.342	7.05e-08	6	Klk8
4.52e-12	0.325623	0.557	0.433	7.3e-08	6	Tnf
1.04e-11	-0.279181	0.912	0.959	1.68e-07	6	Nfkbia
1.43e-11	-0.25481	0.679	0.773	2.3e-07	6	Ski
2.46e-11	0.261711	0.769	0.686	3.98e-07	6	Psmd4
3.82e-11	0.263277	0.895	0.842	6.17e-07	6	Srp14
5.24e-11	-0.284846	0.285	0.419	8.47e-07	6	Nav3
7.18e-11	0.280158	0.771	0.701	1.16e-06	6	Psma4
1.15e-10	0.297249	0.632	0.544	1.85e-06	6	Psmd11
1.51e-10	-0.325412	0.346	0.455	2.44e-06	6	Bnip3
1.62e-10	-0.254853	0.886	0.917	2.62e-06	6	Zfhx3
2.8e-10	-0.259695	0.53	0.635	4.52e-06	6	Fam102b
3.2e-10	0.2508	0.783	0.705	5.18e-06	6	Gde1
4.51e-10	0.260783	0.859	0.818	7.28e-06	6	Tmed2
1.44e-09	-0.303329	0.879	0.906	2.33e-05	6	Ldha
1.74e-09	0.262607	0.689	0.613	2.81e-05	6	Psmd12
7.69e-09	-0.264339	0.9	0.943	0.000124	6	Klf2
8.45e-09	-0.255058	0.576	0.662	0.000137	6	Tsc22d2
7.05e-08	-0.307645	0.448	0.548	0.00113948	6	Nfkbiz
1.6e-07	-0.488567	0.443	0.535	0.00258498	6	Apoc1
3.54e-07	-0.2502	0.752	0.785	0.0057209	6	Ube2s
4.53e-07	0.250104	0.267	0.185	0.00732242	6	Plk2
6.89e-07	0.27489	0.384	0.3	0.0111298	6	Crip1
1.13e-06	0.255764	0.635	0.566	0.0182091	6	Sdf2l1
2.71e-06	0.269727	0.888	0.864	0.0437353	6	Klf6
5.27e-05	-0.286288	0.659	0.716	0.850681	6	Cd83
0.000118	0.330519	0.603	0.638	1	6	Bax
0.00148611	-0.291733	0.061	0.1	1	6	Hist1h2ap
0.00362766	-0.251352	0.669	0.696	1	6	Hmgb2
0	1.4084	0.667	0.051	0	7	Hells
0	1.26081	0.667	0.066	0	7	Mcm5
0	0.947085	0.565	0.063	0	7	Mcm4
0	0.626513	0.365	0.014	0	7	Dtl
1.15e-302	1.31649	0.704	0.113	1.86e-298	7	Mcm6
6.8e-301	0.70462	0.38	0.027	1.1e-296	7	Rad51ap1
2.22e-300	0.595757	0.385	0.028	3.59e-296	7	Fignl1
1.56e-299	0.566803	0.363	0.024	2.51e-295	7	Timeless
1.23e-298	0.828981	0.523	0.057	1.98e-294	7	Mcm2
3.07e-284	0.774927	0.472	0.048	4.96e-280	7	Ung
1.68e-282	0.317827	0.212	0.007	2.71e-278	7	Exo1
[truncated: 3,210 more rows]
