# Supplementary material for: Neuronal apoptosis drives remodeling states of microglia and shifts in survival pathway dependence
Source: eLife. 2022 Apr 28;11:e76564. doi: 10.7554/eLife.76564 (PMC9071266; doi:10.7554/eLife.76564)
Supplement: Supplementary file 2. — Differentially expressed genes in homeostatic clusters (1,2) compared to remodeling clusters (0,3,4,5,6,10). [file elife-76564-supp2.xlsx]

## Sheet: homeostatic vs remodeling marke
p_val	avg_log2FC	pct.1	pct.2	p_val_adj	cluster	gene
0	1.34058	0.678	0.396	0	homeostatic	Ftl1-ps1
0	1.15349	0.85	0.558	0	homeostatic	Tmem119
0	0.859492	0.995	0.945	0	homeostatic	P2ry12
0	0.737357	0.964	0.866	0	homeostatic	Selplg
0	0.598359	0.996	0.963	0	homeostatic	Ier5
0	0.562474	0.999	0.983	0	homeostatic	Egr1
0	0.551199	1	0.999	0	homeostatic	Ddx5
0	0.530073	0.999	0.99	0	homeostatic	Rsrp1
0	0.464735	1	1	0	homeostatic	H3f3b
1.1941e-302	0.586466	0.974	0.929	1.92907e-298	homeostatic	Srsf2
1.77204e-289	0.359505	1	1	2.86274e-285	homeostatic	Eif1
4.95764e-278	0.590681	0.934	0.834	8.00906e-274	homeostatic	Arhgap5
3.36557e-277	0.573723	0.955	0.873	5.43708e-273	homeostatic	Wsb1
1.1355e-275	0.481385	0.991	0.959	1.8344e-271	homeostatic	Lpcat2
7.74804e-263	0.631118	0.996	0.963	1.2517e-258	homeostatic	Jun
2.9646e-262	0.551954	0.955	0.851	4.78931e-258	homeostatic	Siglech
5.12525e-250	0.538776	0.958	0.874	8.27985e-246	homeostatic	Ppp1r10
8.06502e-240	0.477466	1	0.992	1.3029e-235	homeostatic	Junb
4.01501e-226	0.516076	0.956	0.884	6.48625e-222	homeostatic	Mat2a
4.07641e-220	0.497945	0.995	0.956	6.58544e-216	homeostatic	Rhob
1.48182e-213	0.546215	0.929	0.83	2.39389e-209	homeostatic	Ppp1r15a
6.9988e-212	0.513952	0.953	0.901	1.13066e-207	homeostatic	Dynll1
5.8641e-195	0.515787	0.91	0.801	9.47345e-191	homeostatic	Pmepa1
5.21627e-193	0.571076	0.873	0.744	8.42688e-189	homeostatic	Ltc4s
1.96444e-190	0.441107	0.978	0.925	3.17355e-186	homeostatic	Ptgs1
1.50342e-189	0.458071	0.96	0.893	2.42878e-185	homeostatic	Zfhx3
5.58144e-182	0.365443	1	0.999	9.01682e-178	homeostatic	Malat1
1.47028e-175	0.439735	0.964	0.911	2.37524e-171	homeostatic	Tgfbr1
6.59634e-174	0.479469	0.86	0.732	1.06564e-169	homeostatic	Ecscr
5.64108e-172	0.548265	0.615	0.421	9.11316e-168	homeostatic	Cebpd
3.03359e-167	0.431928	0.975	0.935	4.90076e-163	homeostatic	Fus
8.76617e-166	0.341697	1	0.999	1.41617e-161	homeostatic	Ptma
7.84077e-161	0.449453	0.957	0.905	1.26668e-156	homeostatic	Dnaja1
1.37364e-160	0.417994	0.915	0.839	2.21911e-156	homeostatic	Atf4
8.8844e-158	0.537453	0.982	0.92	1.43528e-153	homeostatic	Klf2
7.0559e-157	0.466704	0.827	0.745	1.13988e-152	homeostatic	Ube2s
9.41707e-154	0.516565	0.759	0.647	1.52133e-149	homeostatic	Sertad1
4.93129e-150	0.412556	0.984	0.95	7.9665e-146	homeostatic	Hnrnpa2b1
1.47059e-144	0.30541	1	1	2.37574e-140	homeostatic	Ubc
1.47007e-143	0.456373	0.901	0.816	2.37491e-139	homeostatic	Cited2
3.6136e-140	0.437598	0.864	0.76	5.83777e-136	homeostatic	Ccr5
6.82266e-138	0.453351	0.734	0.603	1.1022e-133	homeostatic	P2ry13
8.55444e-137	0.563218	0.678	0.535	1.38197e-132	homeostatic	Tmsb10
1.40602e-135	0.57576	0.639	0.471	2.27142e-131	homeostatic	Ccl12
1.38261e-132	0.467914	0.677	0.529	2.23361e-128	homeostatic	Il1a
3.52905e-131	0.424025	0.887	0.814	5.70119e-127	homeostatic	Zfp36l1
2.30838e-129	0.402308	0.903	0.831	3.72918e-125	homeostatic	Sfpq
4.50264e-129	0.39763	0.868	0.785	7.27401e-125	homeostatic	Slc38a2
3.71528e-128	0.652937	0.927	0.821	6.00204e-124	homeostatic	Atf3
7.75447e-128	0.355248	0.921	0.855	1.25273e-123	homeostatic	Cmtm7
4.95724e-126	0.391664	0.874	0.81	8.00842e-122	homeostatic	Jpt1
1.45219e-125	0.34741	0.953	0.902	2.34601e-121	homeostatic	F11r
2.3111e-125	0.338828	0.985	0.97	3.73359e-121	homeostatic	Eif5
6.75089e-121	0.409944	0.779	0.689	1.09061e-116	homeostatic	Ivns1abp
8.29261e-119	0.347587	0.974	0.936	1.33967e-114	homeostatic	Srsf3
1.02311e-117	0.301068	0.993	0.977	1.65283e-113	homeostatic	Srrm2
1.43734e-115	0.399576	0.822	0.755	2.32203e-111	homeostatic	Brd2
4.79972e-115	0.478518	0.667	0.536	7.75394e-111	homeostatic	Ints6
9.45345e-114	0.526033	0.679	0.545	1.5272e-109	homeostatic	Klf4
2.96349e-113	0.35273	0.911	0.836	4.78752e-109	homeostatic	Ssh2
2.06603e-111	0.360695	0.985	0.96	3.33767e-107	homeostatic	Hsp90aa1
4.18903e-110	0.47254	0.704	0.598	6.76738e-106	homeostatic	Snhg12
2.24361e-109	0.367893	0.828	0.762	3.62455e-105	homeostatic	Nrip1
1.70957e-107	0.342512	0.994	0.985	2.76181e-103	homeostatic	Mafb
1.38166e-105	0.489955	0.516	0.356	2.23208e-101	homeostatic	Nav3
1.53809e-104	0.425293	0.681	0.572	2.48478e-100	homeostatic	Hexim1
1.79138e-104	0.265721	0.999	0.992	2.89397e-100	homeostatic	Ckb
3.81888e-104	0.338788	0.983	0.961	6.1694e-100	homeostatic	Mylip
1.55981e-103	0.281549	0.997	0.994	2.51987e-99	homeostatic	Calm2
2.28119e-102	0.332346	0.992	0.964	3.68526e-98	homeostatic	Btg2
1.05467e-101	0.304753	0.951	0.911	1.70382e-97	homeostatic	Mef2a
2.91935e-100	0.362257	0.419	0.256	4.71621e-96	homeostatic	Slc2a5
1.26665e-97	0.3612	0.8	0.732	2.04628e-93	homeostatic	Smad7
3.34273e-97	0.340967	0.953	0.902	5.40018e-93	homeostatic	Skil
3.34122e-96	0.286456	0.976	0.951	5.39774e-92	homeostatic	Btg1
6.68388e-95	0.312623	0.896	0.838	1.07978e-90	homeostatic	Srgap2
2.18966e-93	0.363945	0.988	0.961	3.5374e-89	homeostatic	Ier3
2.8838e-93	0.426196	0.608	0.485	4.65878e-89	homeostatic	Adrb2
2.00594e-92	0.406209	0.607	0.473	3.2406e-88	homeostatic	Alox5ap
1.84348e-90	0.349328	0.894	0.82	2.97814e-86	homeostatic	Itgam
3.28605e-90	0.382058	0.676	0.582	5.30861e-86	homeostatic	Spint1
1.72053e-89	0.350294	0.853	0.788	2.77951e-85	homeostatic	Rbbp6
1.78159e-88	0.414136	0.693	0.596	2.87815e-84	homeostatic	Ddit3
1.0307e-87	0.38295	0.589	0.468	1.66509e-83	homeostatic	St3gal6
1.82944e-86	0.255612	0.99	0.972	2.95546e-82	homeostatic	Hpgds
6.32491e-85	0.356704	0.436	0.294	1.02179e-80	homeostatic	Rapgef5
7.83925e-85	0.345207	0.817	0.762	1.26643e-80	homeostatic	Tubb2a
4.16079e-82	0.30069	0.88	0.84	6.72176e-78	homeostatic	Pnp
4.35976e-82	0.28574	0.917	0.881	7.04318e-78	homeostatic	Ptprc
8.06748e-82	0.373238	0.751	0.689	1.3033e-77	homeostatic	Txnip
1.35869e-80	0.321472	0.859	0.802	2.19497e-76	homeostatic	Tra2a
2.2833e-80	0.32539	0.808	0.754	3.68867e-76	homeostatic	Zfp36l2
1.23864e-79	0.299502	0.827	0.78	2.00103e-75	homeostatic	Fgd2
4.12096e-78	0.262789	0.953	0.91	6.65742e-74	homeostatic	Picalm
8.29402e-78	0.33362	0.701	0.621	1.3399e-73	homeostatic	Dock10
1.00286e-77	0.350058	0.889	0.803	1.62012e-73	homeostatic	Dusp1
1.07784e-77	0.771642	0.93	0.787	1.74125e-73	homeostatic	Ccl4
2.85479e-77	0.316596	0.928	0.872	4.61191e-73	homeostatic	Maf
6.86909e-76	0.401468	0.733	0.655	1.1097e-71	homeostatic	Sox4
8.64571e-74	0.282836	0.861	0.81	1.39672e-69	homeostatic	Tanc2
9.8134e-74	0.297898	0.946	0.876	1.58536e-69	homeostatic	Icam1
1.20064e-73	0.329111	0.781	0.712	1.93964e-69	homeostatic	Sgk1
1.39817e-73	0.284092	0.903	0.865	2.25874e-69	homeostatic	Purb
3.8457e-72	0.353685	0.701	0.63	6.21272e-68	homeostatic	Dnajb9
4.24228e-71	0.331325	0.623	0.526	6.85341e-67	homeostatic	Adgrg1
1.9806e-69	0.293438	0.972	0.936	3.19967e-65	homeostatic	Zfand5
9.85705e-69	0.259095	1	0.996	1.59241e-64	homeostatic	Cx3cr1
3.65098e-67	0.293022	0.806	0.759	5.89817e-63	homeostatic	Ddx3x
1.68245e-66	0.302645	0.97	0.928	2.718e-62	homeostatic	Ier2
5.56465e-66	0.296886	0.88	0.828	8.9897e-62	homeostatic	Tra2b
3.24733e-65	0.340307	0.637	0.553	5.24606e-61	homeostatic	Camk2n1
9.8323e-65	0.265846	0.884	0.832	1.58841e-60	homeostatic	Ppfia4
4.22876e-64	0.279477	0.799	0.758	6.83156e-60	homeostatic	Pde3b
2.79318e-63	0.256313	0.824	0.773	4.51238e-59	homeostatic	Retreg1
4.03017e-62	0.271365	0.786	0.742	6.51075e-58	homeostatic	Hnrnpdl
6.67141e-62	0.253391	0.994	0.981	1.07777e-57	homeostatic	Jund
2.8765e-60	0.329236	0.708	0.659	4.64699e-56	homeostatic	Gls
6.44606e-60	0.252238	0.818	0.771	1.04136e-55	homeostatic	Cttnbp2nl
1.58667e-59	0.46513	0.672	0.606	2.56326e-55	homeostatic	Gadd45g
9.76712e-59	0.28471	0.842	0.808	1.57788e-54	homeostatic	Jmjd1c
5.2134e-57	0.304338	0.655	0.597	8.42224e-53	homeostatic	Mgat4a
5.79186e-56	0.27401	0.785	0.738	9.35675e-52	homeostatic	Ntpcr
8.50591e-56	0.280514	0.702	0.655	1.37413e-51	homeostatic	Commd8
3.69348e-55	0.268831	0.905	0.865	5.96681e-51	homeostatic	Arhgap17
2.23842e-53	0.257391	0.785	0.752	3.61617e-49	homeostatic	Il6ra
2.49114e-53	0.332465	0.658	0.599	4.02443e-49	homeostatic	Tsc22d3
1.0365e-52	0.310426	0.64	0.58	1.67446e-48	homeostatic	Srsf7
5.94299e-52	0.280703	0.744	0.715	9.60089e-48	homeostatic	Eif4a2
1.30695e-51	0.294204	0.725	0.682	2.11137e-47	homeostatic	Nufip2
7.45907e-51	0.298764	0.414	0.311	1.20501e-46	homeostatic	Tob1
7.75495e-48	0.315256	0.514	0.419	1.25281e-43	homeostatic	Marcksl1
5.66331e-47	0.256057	0.753	0.719	9.14908e-43	homeostatic	Slc16a6
2.67715e-46	0.254558	0.682	0.628	4.32494e-42	homeostatic	Tm6sf1
3.22903e-46	0.427011	0.35	0.25	5.2165e-42	homeostatic	Hspa1a
4.77071e-46	0.300676	0.579	0.514	7.70709e-42	homeostatic	Herpud1
1.19011e-40	0.27613	0.519	0.443	1.92262e-36	homeostatic	Nabp1
2.36884e-39	0.273934	0.469	0.377	3.82686e-35	homeostatic	Socs3
2.4549e-34	0.280121	0.588	0.537	3.96589e-30	homeostatic	Dnajb1
3.50921e-34	0.260981	0.621	0.586	5.66913e-30	homeostatic	Ubash3b
7.86763e-34	0.253187	0.656	0.632	1.27102e-29	homeostatic	Senp2
1.19732e-32	0.268965	0.594	0.54	1.93427e-28	homeostatic	Tuba1a
2.64483e-32	0.265918	0.614	0.573	4.27272e-28	homeostatic	Tob2
1.11354e-26	0.381594	0.925	0.847	1.79893e-22	homeostatic	Ccl3
1.40741e-22	0.277968	0.345	0.278	2.27367e-18	homeostatic	Ccl2
4.57741e-21	0.266794	0.298	0.235	7.3948e-17	homeostatic	Hes1
7.30322e-15	0.397708	0.414	0.374	1.17984e-10	homeostatic	Rgs1
0	1.45266	0.762	0.532	0	remodeling	Fabp5
0	1.23983	0.85	0.688	0	remodeling	Lpl
0	1.06435	0.994	0.98	0	remodeling	Ftl1
0	1.0587	0.691	0.252	0	remodeling	Igf1
0	0.916122	0.999	0.998	0	remodeling	Lyz2
0	0.910724	0.939	0.903	0	remodeling	Mif
0	0.757522	0.628	0.263	0	remodeling	Cst7
0	0.742795	0.757	0.383	0	remodeling	Gm1673
0	0.67889	0.677	0.325	0	remodeling	Anxa5
0	0.665333	0.985	0.966	0	remodeling	Aldoa
0	0.654666	1	1	0	remodeling	Ctsd
0	0.652307	0.998	0.996	0	remodeling	Creg1
0	0.640292	1	1	0	remodeling	Apoe
0	0.636639	0.95	0.845	0	remodeling	Pld3
0	0.625849	0.997	0.997	0	remodeling	mt-Nd3
0	0.621531	0.778	0.41	0	remodeling	Bax
0	0.619821	0.626	0.272	0	remodeling	Nceh1
0	0.590905	1	1	0	remodeling	Cd63
0	0.590838	1	1	0	remodeling	Ctsb
0	0.578675	0.999	0.997	0	remodeling	Timp2
0	0.477511	0.999	1	0	remodeling	mt-Nd1
0	0.470259	1	1	0	remodeling	mt-Nd2
0	0.405438	1	1	0	remodeling	mt-Co3
0	0.328364	1	1	0	remodeling	Tyrobp
1.76622e-297	0.75773	0.989	0.98	2.85332e-293	remodeling	Pkm
2.12411e-286	0.729574	0.867	0.678	3.43149e-282	remodeling	Plin2
3.32061e-283	0.393704	1	0.999	5.36444e-279	remodeling	Ctsa
4.08911e-277	0.368724	1	1	6.60596e-273	remodeling	Ctsz
1.16183e-275	0.502427	1	1	1.87694e-271	remodeling	Gapdh
2.40104e-273	0.343257	1	1	3.87888e-269	remodeling	mt-Atp6
4.54548e-268	0.47346	0.988	0.969	7.34322e-264	remodeling	Ucp2
8.71018e-268	2.34346	0.372	0.096	1.40713e-263	remodeling	Spp1
1.64559e-255	0.405805	0.999	0.998	2.65845e-251	remodeling	Hexa
3.15749e-238	0.325639	1	1	5.10093e-234	remodeling	mt-Co2
1.21204e-234	0.478569	0.982	0.98	1.95805e-230	remodeling	Syngr1
4.84748e-232	0.323259	1	1	7.8311e-228	remodeling	mt-Cytb
1.62046e-227	0.888756	0.335	0.088	2.61786e-223	remodeling	Lgals3
3.71878e-226	0.447891	0.994	0.992	6.0077e-222	remodeling	Cd68
3.15973e-217	0.446493	0.571	0.281	5.10454e-213	remodeling	Psat1
9.93103e-216	0.448939	1	1	1.60436e-211	remodeling	Selenop
2.86121e-199	0.448697	0.84	0.631	4.62229e-195	remodeling	Tmem256
1.09586e-197	0.31794	1	1	1.77036e-193	remodeling	Cyba
2.91284e-197	0.29186	1	1	4.7057e-193	remodeling	mt-Nd4
5.84067e-197	0.400955	0.366	0.122	9.4356e-193	remodeling	Vat1
7.49559e-196	0.366842	0.987	0.978	1.21091e-191	remodeling	Prdx5
1.0642e-193	0.263197	1	1	1.71922e-189	remodeling	Lamp1
3.7001e-193	0.428726	0.735	0.464	5.97751e-189	remodeling	Ndufa1
1.37031e-190	0.594978	0.846	0.715	2.21374e-186	remodeling	Pgk1
1.04804e-189	0.396424	0.981	0.964	1.69311e-185	remodeling	Abca1
8.71939e-189	0.584066	0.897	0.84	1.40862e-184	remodeling	Pgam1
1.85406e-182	0.524069	0.856	0.693	2.99523e-178	remodeling	Lipa
4.16638e-179	0.456349	0.384	0.15	6.73079e-175	remodeling	Sash1
5.29772e-177	0.630143	0.326	0.108	8.55847e-173	remodeling	Lgals1
1.22038e-175	0.413172	0.857	0.66	1.97152e-171	remodeling	H2afj
1.24673e-174	0.292086	1	1	2.01409e-170	remodeling	Grn
9.82187e-171	0.350767	0.993	0.991	1.58672e-166	remodeling	Cotl1
2.37738e-169	0.405347	0.867	0.695	3.84066e-165	remodeling	Uqcr10
1.19871e-168	0.403442	0.38	0.151	1.93652e-164	remodeling	Anxa2
6.42745e-167	0.316778	1	1	1.03835e-162	remodeling	Ctsl
8.03783e-167	0.42806	0.835	0.636	1.29851e-162	remodeling	Lrpap1
1.3039e-166	1.27914	0.61	0.413	2.10646e-162	remodeling	Apoc1
1.55227e-166	0.462354	0.416	0.182	2.50769e-162	remodeling	Ank
7.95841e-165	0.442713	0.904	0.799	1.28568e-160	remodeling	Psmb6
1.11097e-161	0.333194	0.974	0.956	1.79478e-157	remodeling	Cox6c
1.97293e-161	0.372864	0.621	0.365	3.18727e-157	remodeling	Gaa
7.14328e-161	0.319971	0.994	0.992	1.154e-156	remodeling	Abhd12
7.27028e-160	0.32402	0.319	0.109	1.17451e-155	remodeling	Atp1a3
6.444e-159	0.38096	0.779	0.546	1.04103e-154	remodeling	Tmem160
1.4416e-158	0.420443	0.654	0.406	2.32891e-154	remodeling	Lgals3bp
7.51075e-158	0.423724	0.728	0.492	1.21336e-153	remodeling	Ninj1
7.65254e-158	0.279701	0.999	0.999	1.23627e-153	remodeling	Gng5
8.15002e-158	0.380681	0.567	0.321	1.31664e-153	remodeling	Uap1l1
1.08467e-157	0.38392	0.558	0.309	1.75228e-153	remodeling	Acadl
4.12216e-157	0.520927	0.545	0.314	6.65935e-153	remodeling	Bnip3
2.50668e-156	0.575414	0.518	0.293	4.04954e-152	remodeling	Npl
2.70204e-155	0.405623	0.802	0.598	4.36515e-151	remodeling	Atp5k
1.73866e-150	0.363607	0.917	0.807	2.8088e-146	remodeling	Uqcr11
2.12466e-150	0.48431	0.935	0.903	3.4324e-146	remodeling	Eno1
4.47122e-150	0.572541	0.765	0.581	7.22325e-146	remodeling	Ccl6
2.99319e-147	0.36395	0.711	0.472	4.83549e-143	remodeling	Echs1
4.2466e-147	0.375805	0.747	0.517	6.86038e-143	remodeling	Ndufc1
4.65891e-146	0.361953	0.519	0.279	7.52647e-142	remodeling	Gpr137b
4.943e-146	0.395283	0.378	0.164	7.98541e-142	remodeling	Crip1
6.70295e-146	0.396815	0.771	0.545	1.08286e-141	remodeling	Rcbtb2
1.96867e-145	0.311566	0.966	0.93	3.18039e-141	remodeling	Ubl5
1.06418e-144	0.372542	0.836	0.635	1.71918e-140	remodeling	Dhrs3
1.1853e-143	0.337672	0.276	0.086	1.91486e-139	remodeling	Rab7b
1.68938e-143	0.342012	0.628	0.385	2.7292e-139	remodeling	Pet100
1.69097e-143	0.296518	0.99	0.982	2.73177e-139	remodeling	Atp5e
4.58573e-140	0.363512	0.939	0.878	7.40824e-136	remodeling	Gpi1
8.57099e-140	0.370831	0.85	0.659	1.38464e-135	remodeling	Abcg1
8.83434e-140	0.312498	0.98	0.956	1.42719e-135	remodeling	Akr1a1
6.47649e-139	0.592865	0.88	0.837	1.04628e-134	remodeling	Tpi1
1.0783e-138	0.42356	0.65	0.419	1.74199e-134	remodeling	Scd2
1.78067e-138	0.284638	0.998	0.997	2.87667e-134	remodeling	Myl6
8.10334e-138	0.356975	0.84	0.638	1.30909e-133	remodeling	Cndp2
2.22588e-137	0.453471	0.824	0.668	3.59591e-133	remodeling	Cstb
1.52577e-136	0.321131	0.469	0.246	2.46488e-132	remodeling	1700003F12Rik
2.95683e-134	0.396282	0.547	0.319	4.77676e-130	remodeling	Arl5c
7.53286e-134	0.312222	0.532	0.298	1.21693e-129	remodeling	Acaa2
4.69142e-133	0.46732	0.384	0.175	7.57898e-129	remodeling	Sdc4
1.35991e-129	0.273849	0.264	0.089	2.19694e-125	remodeling	Rftn1
7.66315e-129	0.33274	0.496	0.274	1.23798e-124	remodeling	Mitf
1.34813e-128	0.333464	0.747	0.518	2.1779e-124	remodeling	Bola2
1.86936e-128	0.31002	0.932	0.852	3.01996e-124	remodeling	Ndufa2
2.79799e-128	0.371839	0.452	0.246	4.52015e-124	remodeling	Fam162a
2.24882e-127	0.325847	0.621	0.392	3.63296e-123	remodeling	Glb1
5.63452e-126	0.304379	0.303	0.12	9.10256e-122	remodeling	Adssl1
1.91985e-125	0.276505	0.308	0.123	3.10151e-121	remodeling	Sulf2
2.02181e-125	0.279211	0.97	0.944	3.26623e-121	remodeling	Cox6b1
4.04268e-125	0.308297	0.65	0.419	6.53095e-121	remodeling	Dpm3
1.1092e-124	0.330169	0.722	0.495	1.79191e-120	remodeling	Commd9
1.23304e-124	0.441841	0.806	0.64	1.99197e-120	remodeling	Aldh2
1.33684e-124	0.335768	0.973	0.956	2.15966e-120	remodeling	Bri3
3.52491e-124	0.363319	0.471	0.262	5.69448e-120	remodeling	Slc48a1
5.88553e-124	0.302023	0.365	0.168	9.50808e-120	remodeling	Myo5a
5.71568e-123	0.301592	0.583	0.358	9.23369e-119	remodeling	Ndufa5
2.77103e-122	0.332197	0.84	0.664	4.47659e-118	remodeling	Ndufv3
2.00066e-121	0.360169	0.633	0.416	3.23206e-117	remodeling	Rhoc
2.57327e-121	0.294943	0.547	0.326	4.15712e-117	remodeling	Mrpl54
6.10584e-121	0.337293	0.705	0.485	9.86399e-117	remodeling	P2rx4
3.2435e-120	0.297841	0.382	0.187	5.23988e-116	remodeling	C1galt1c1
4.53216e-120	0.378459	0.767	0.577	7.32171e-116	remodeling	Aplp2
2.4885e-119	0.282816	0.213	0.06	4.02017e-115	remodeling	Chst2
2.49644e-119	0.314586	0.757	0.541	4.033e-115	remodeling	Ndufa3
4.69769e-119	0.323521	0.777	0.573	7.58912e-115	remodeling	Romo1
2.24842e-118	0.270042	0.32	0.137	3.63233e-114	remodeling	Sh3bgrl
2.4441e-118	0.420763	0.324	0.14	3.94844e-114	remodeling	Csf1
3.50943e-118	0.335802	0.734	0.522	5.66949e-114	remodeling	Dtnbp1
7.23001e-118	0.373411	0.376	0.179	1.16801e-113	remodeling	Mt2
1.02781e-117	0.301271	0.533	0.315	1.66043e-113	remodeling	Amdhd2
1.67916e-117	0.303437	0.93	0.862	2.71269e-113	remodeling	Elob
2.22052e-117	0.292142	0.955	0.903	3.58725e-113	remodeling	Ndufa13
4.03184e-117	0.290356	0.398	0.199	6.51343e-113	remodeling	Epb41l3
7.28274e-117	0.313429	0.601	0.379	1.17653e-112	remodeling	Axl
8.8533e-117	0.295583	0.607	0.384	1.43025e-112	remodeling	Ndufb2
2.42232e-116	0.283716	0.232	0.074	3.91326e-112	remodeling	Fam20c
1.34907e-113	0.319547	0.378	0.19	2.17943e-109	remodeling	Gpx3
4.92851e-113	0.395014	0.726	0.521	7.96201e-109	remodeling	Txn1
1.1305e-112	0.350796	0.835	0.679	1.82633e-108	remodeling	Aprt
5.60872e-112	0.345037	0.759	0.561	9.06089e-108	remodeling	Cpd
9.44249e-112	0.274838	0.405	0.211	1.52543e-107	remodeling	Galk1
9.60423e-112	0.343719	0.801	0.62	1.55156e-107	remodeling	Tspo
5.72597e-111	0.268751	0.979	0.961	9.2503e-107	remodeling	Cox7c
8.13049e-111	0.275271	0.358	0.173	1.31348e-106	remodeling	H2-Ab1
9.28693e-111	0.299466	0.601	0.384	1.5003e-106	remodeling	Arl11
2.15086e-110	0.334784	0.819	0.648	3.47471e-106	remodeling	mt-Atp8
2.89412e-110	0.288042	0.634	0.418	4.67546e-106	remodeling	Ndufs6
3.53819e-110	0.304325	0.351	0.169	5.71595e-106	remodeling	Myo1e
2.34418e-109	0.336207	0.666	0.454	3.78703e-105	remodeling	Eprs
5.16419e-109	0.319166	0.659	0.444	8.34275e-105	remodeling	Soat1
2.09293e-107	0.30739	0.805	0.625	3.38112e-103	remodeling	Timm13
3.38277e-107	0.27687	0.36	0.178	5.46487e-103	remodeling	S100a1
5.0564e-107	0.281438	0.325	0.149	8.16861e-103	remodeling	Gas2l3
9.41842e-107	0.297798	0.98	0.971	1.52155e-102	remodeling	mt-Nd4l
2.6419e-106	0.288571	0.552	0.345	4.26799e-102	remodeling	Ethe1
2.9637e-106	0.286216	0.716	0.493	4.78785e-102	remodeling	Etfb
4.62136e-106	0.293905	0.77	0.571	7.46582e-102	remodeling	Txndc17
9.75166e-106	0.320142	0.862	0.718	1.57538e-101	remodeling	Selenow
9.87984e-106	0.254115	0.344	0.164	1.59609e-101	remodeling	Cpt1a
1.37077e-105	0.25034	0.327	0.152	2.21448e-101	remodeling	Anxa4
1.58304e-105	0.27483	0.956	0.925	2.5574e-101	remodeling	Tpp1
1.6385e-105	0.319317	0.753	0.562	2.64699e-101	remodeling	Atxn10
3.03768e-105	0.300546	0.708	0.493	4.90737e-101	remodeling	Atp6v1b2
8.01652e-105	0.313628	0.808	0.627	1.29507e-100	remodeling	Plgrkt
9.16686e-105	0.311317	0.802	0.622	1.48091e-100	remodeling	Tomm7
9.55191e-105	0.308993	0.999	0.999	1.54311e-100	remodeling	Cd9
1.8624e-104	0.263212	0.989	0.989	3.0087e-100	remodeling	mt-Nd5
4.10835e-104	0.309614	0.645	0.435	6.63704e-100	remodeling	Slc43a2
2.31758e-103	0.281099	0.697	0.489	3.74405e-99	remodeling	Mrps21
1.06464e-102	0.287376	0.921	0.84	1.71993e-98	remodeling	Uqcrq
1.30879e-102	0.276454	0.601	0.391	2.11436e-98	remodeling	Gsto1
1.32821e-102	0.269335	0.952	0.913	2.14572e-98	remodeling	Atp5j2
3.12226e-102	0.271818	0.275	0.113	5.044e-98	remodeling	Gpr65
5.87039e-102	0.297892	0.779	0.579	9.48362e-98	remodeling	Atp13a2
1.79483e-101	0.30779	0.831	0.675	2.89954e-97	remodeling	Calm3
4.19236e-101	0.272064	0.626	0.416	6.77276e-97	remodeling	S100a13
7.01928e-101	0.260482	0.572	0.365	1.13397e-96	remodeling	Mien1
2.26663e-100	0.26687	0.535	0.332	3.66174e-96	remodeling	Plin3
4.78779e-100	0.285567	0.539	0.339	7.73468e-96	remodeling	Gng12
6.83565e-100	0.278907	0.661	0.457	1.1043e-95	remodeling	Renbp
3.90046e-99	0.284648	0.796	0.597	6.30119e-95	remodeling	Nucb1
5.03631e-99	0.262305	0.969	0.949	8.13616e-95	remodeling	Gpx4
1.49304e-98	0.295811	0.715	0.512	2.41201e-94	remodeling	Akr1b3
2.59915e-98	0.291903	0.301	0.138	4.19893e-94	remodeling	Serpinb6a
3.69203e-98	0.305895	0.864	0.734	5.96448e-94	remodeling	Ndufb8
9.46466e-98	0.268417	0.427	0.242	1.52902e-93	remodeling	Maged1
2.1045e-97	0.254239	0.388	0.209	3.39982e-93	remodeling	Mpp1
2.13986e-97	0.306429	0.551	0.35	3.45695e-93	remodeling	Arid5b
2.51392e-97	0.266725	0.583	0.381	4.06123e-93	remodeling	Cops6
2.8132e-97	0.265729	0.598	0.391	4.54473e-93	remodeling	Abcd2
3.21236e-97	0.271093	0.931	0.875	5.18957e-93	remodeling	Tpd52
3.57541e-97	0.278205	0.752	0.546	5.77607e-93	remodeling	Plbd2
1.04867e-96	0.259554	0.413	0.227	1.69412e-92	remodeling	Sdc3
2.30608e-96	0.253647	0.511	0.315	3.72547e-92	remodeling	Gba
3.15699e-96	0.262576	0.667	0.462	5.10011e-92	remodeling	Mrpl34
5.59811e-96	0.264477	0.247	0.097	9.04375e-92	remodeling	Fabp3
2.2422e-95	0.434665	0.79	0.644	3.62228e-91	remodeling	Blvrb
4.82808e-95	0.250705	0.265	0.113	7.79977e-91	remodeling	Gsn
1.00891e-94	0.258699	0.335	0.168	1.62989e-90	remodeling	Pgm2
4.8736e-94	0.269098	0.903	0.792	7.87331e-90	remodeling	Capns1
6.74079e-94	0.279743	0.863	0.729	1.08897e-89	remodeling	2010107E04Rik
9.63499e-94	0.417562	0.729	0.566	1.55653e-89	remodeling	Gatm
2.3113e-93	0.287025	0.485	0.293	3.73391e-89	remodeling	Ramp1
9.13178e-93	0.268065	0.658	0.457	1.47524e-88	remodeling	1810058I24Rik
3.0483e-92	0.287617	0.775	0.602	4.92453e-88	remodeling	Chmp2a
3.8251e-92	0.279761	0.733	0.538	6.17945e-88	remodeling	Gltp
4.96571e-92	0.292059	0.787	0.625	8.0221e-88	remodeling	Atp5o.1
7.97286e-92	0.281707	0.864	0.73	1.28802e-87	remodeling	Bag1
1.80497e-91	0.318683	0.435	0.252	2.91592e-87	remodeling	Pmp22
2.31007e-91	0.254068	0.526	0.335	3.73192e-87	remodeling	Dap
2.77965e-91	0.272768	0.988	0.98	4.49052e-87	remodeling	Bsg
2.87718e-91	0.267325	0.757	0.563	4.64808e-87	remodeling	Tmem258
1.02328e-90	0.255176	0.612	0.413	1.6531e-86	remodeling	Hcfc1r1
1.74662e-90	0.252196	0.605	0.403	2.82167e-86	remodeling	Gtf2h5
2.0682e-90	0.270777	0.907	0.806	3.34117e-86	remodeling	Scarb2
2.41527e-90	0.408165	0.974	0.98	3.90187e-86	remodeling	Mt1
2.8759e-90	0.264282	0.664	0.465	4.64602e-86	remodeling	Napa
6.19988e-90	0.283453	0.761	0.574	1.00159e-85	remodeling	Prelid1
2.1346e-89	0.260159	0.605	0.407	3.44845e-85	remodeling	Fundc2
5.00501e-89	0.430901	0.904	0.898	8.0856e-85	remodeling	Ldha
8.3211e-89	0.266913	0.516	0.328	1.34427e-84	remodeling	Wwp2
9.19012e-89	0.301817	0.464	0.278	1.48466e-84	remodeling	Hist1h2bc
3.61558e-88	0.259403	0.59	0.394	5.84097e-84	remodeling	Ost4
4.25145e-88	0.306075	0.511	0.331	6.86822e-84	remodeling	Fxyd5
4.80594e-88	0.296242	0.592	0.402	7.76399e-84	remodeling	Pfkl
5.59136e-88	0.306365	0.436	0.259	9.03284e-84	remodeling	Itgax
8.7561e-88	0.26895	0.711	0.516	1.41455e-83	remodeling	Sgpl1
1.67826e-87	0.262125	0.749	0.559	2.71124e-83	remodeling	Pdcd5
3.45122e-87	0.267892	0.814	0.662	5.57544e-83	remodeling	Ndufb7
5.32219e-87	0.261705	0.891	0.791	8.59799e-83	remodeling	Glmp
2.56445e-85	0.272664	0.346	0.182	4.14286e-81	remodeling	Ifitm2
7.19083e-85	0.281148	0.997	0.998	1.16168e-80	remodeling	Cd52
7.38068e-85	0.258116	0.472	0.29	1.19235e-80	remodeling	Rap2b
9.35219e-85	0.321882	0.378	0.217	1.51085e-80	remodeling	Capg
1.51851e-84	0.257547	0.654	0.463	2.45316e-80	remodeling	Usmg5
3.29721e-84	0.302554	0.453	0.277	5.32664e-80	remodeling	Crlf2
4.94183e-84	0.334771	0.959	0.951	7.98353e-80	remodeling	Bcl2a1b
2.44874e-83	0.2669	0.904	0.838	3.95594e-79	remodeling	Oxct1
4.50989e-83	0.252438	0.628	0.439	7.28573e-79	remodeling	Ndufa12
1.23078e-81	0.258707	0.469	0.293	1.98832e-77	remodeling	Glipr1
1.59462e-81	0.268856	0.881	0.78	2.57611e-77	remodeling	Cox7b
1.67137e-81	0.257563	0.811	0.642	2.70009e-77	remodeling	Aes
1.83902e-81	0.254694	0.755	0.576	2.97094e-77	remodeling	Ndufs5
4.11168e-80	0.263878	0.861	0.736	6.64242e-76	remodeling	Ube2l3
6.3804e-79	0.255689	0.762	0.584	1.03075e-74	remodeling	Cuedc2
9.85025e-79	0.252746	0.781	0.611	1.59131e-74	remodeling	Swi5
2.13903e-78	0.259493	0.796	0.624	3.4556e-74	remodeling	Lamtor2
2.36449e-78	0.25102	0.87	0.761	3.81983e-74	remodeling	Cops9
2.91381e-78	0.260255	0.799	0.629	4.70725e-74	remodeling	0610012G03Rik
1.98809e-77	0.263434	0.381	0.22	3.21177e-73	remodeling	Tnfaip2
1.97819e-76	0.273953	0.541	0.36	3.19576e-72	remodeling	Cxcl16
1.07691e-75	0.256944	0.755	0.581	1.73975e-71	remodeling	Naglu
5.09102e-75	0.259727	0.818	0.671	8.22454e-71	remodeling	Psmb4
7.94051e-74	0.440502	0.971	0.975	1.28279e-69	remodeling	Prdx1
8.6861e-74	0.272717	0.619	0.44	1.40324e-69	remodeling	Hif1a
7.90493e-73	1.36289	0.142	0.044	1.27704e-68	remodeling	Cxcl2
4.70583e-72	0.253852	0.523	0.353	7.60226e-68	remodeling	Nrp2
9.16938e-71	0.274069	0.527	0.363	1.48131e-66	remodeling	Egln1
1.39054e-70	0.271343	0.856	0.743	2.24642e-66	remodeling	Psma7
7.14526e-70	0.320246	0.557	0.386	1.15432e-65	remodeling	Slc40a1
2.01298e-69	0.259976	0.516	0.35	3.25197e-65	remodeling	Ifi27
3.29183e-67	0.299613	0.989	0.991	5.31795e-63	remodeling	H2-D1
1.996e-66	0.309107	0.584	0.422	3.22454e-62	remodeling	Slc16a3
9.09467e-66	0.262664	0.653	0.484	1.46924e-61	remodeling	Stab1
1.60437e-63	0.265035	0.755	0.607	2.59187e-59	remodeling	Nme1
5.01802e-62	0.269618	0.357	0.217	8.10661e-58	remodeling	Slfn2
5.16513e-61	0.251968	0.642	0.483	8.34426e-57	remodeling	Prdx4
6.30109e-59	0.256107	0.623	0.459	1.01794e-54	remodeling	Sdf2l1
5.03461e-56	0.265752	0.804	0.695	8.13341e-52	remodeling	Gas6
3.84541e-54	0.273332	0.959	0.944	6.21225e-50	remodeling	Taldo1
1.12033e-53	0.288	0.226	0.118	1.80989e-49	remodeling	Ccrl2
2.40216e-53	0.251651	0.781	0.661	3.8807e-49	remodeling	AY036118
6.75152e-53	0.846001	0.122	0.043	1.09071e-48	remodeling	Cxcl10
1.11818e-52	0.463132	0.365	0.236	1.80641e-48	remodeling	Gclm
2.45945e-52	0.344401	0.528	0.392	3.97323e-48	remodeling	Ccl9
1.01112e-47	0.312008	0.972	0.985	1.63346e-43	remodeling	Calr
1.36781e-45	0.421244	1	1	2.20969e-41	remodeling	Fth1
2.07406e-33	0.837213	0.212	0.131	3.35064e-29	remodeling	Il1b
3.1928e-22	1.08844	0.791	0.716	5.15797e-18	remodeling	Hmox1
2.06783e-17	0.299152	0.909	0.939	3.34058e-13	remodeling	Uba52
8.76741e-07	0.30117	0.32	0.276	0.0141638	remodeling	Cdkn1a
