# Supplementary material for: Neuronal apoptosis drives remodeling states of microglia and shifts in survival pathway dependence
Source: eLife. 2022 Apr 28;11:e76564. doi: 10.7554/eLife.76564 (PMC9071266; doi:10.7554/eLife.76564)
Supplement: Supplementary file 7. — Statistics for Figure 5, Figure 5—figure supplement 1, and Figure 6. [file elife-76564-supp7.xlsx]

## Sheet: CC3+RBPMS+
Figure 5
Welch's ANOVA	W(3,12.58)=23.75 ****p<0.0001
Dunnett's T3 multiple comparisons test
		CX3CR1-GFP/+	CX3CR1 KO	CR3 KO GFP/+
CX3CR1 WT		ns p=0.7576	ns p=0.6798	**p=0.0016
CX3CR1-GFP/+			*p=0.035	**p=0.004
CX3CR1 KO				****p<0.0001
Kruskal-Wallis test	statistic=25.97 ****p<0.0001
Dunn's multiple comparisons test
		Mertk KO	Axl KO	Mertk Axl dKO
Mertk WT		**p=0.001	ns p>.9999	**p=0.0014
Mertk KO			** p=0.0026	ns p>0.9999
Axl KO				**p=0.0036

## Sheet: C1q+
Figure 5- figure supplement 1
Kruskal-Wallis test	statistic=15.91 **p<0.0071
Dunn's multiple comparisons test
		CX3CR1 KO	CR3 KO GFP/+	Mertk KO	Axl KO	Mertk Axl dKO
CX3CR1-GFP/+		ns p>.9999	ns p>.9999	ns p>.9999	ns p>.9999	ns p>.9999
CX3CR1 KO			ns p>.9999	*p=0.0489	ns p>.9999	*p=0.0432
CR3 KO GFP/+				ns p>.9999	ns p>.9999	ns p>.9999
Mertk KO					ns p>.9999	ns p>.9999
Axl KO						ns p>.9999

## Sheet: CC3+
Figure 5- figure supplement 1
Ordinary one-way ANOVA	F(2,29)=12.95 ****p<0.0001
Tukey's multiple comparisons test
		CX3CR1 KO	CR3 KO GFP/+
CX3CR1 WT		*p=0.0201	****p<0.0001
CX3CR1 KO			ns p=0.1701
Welch's ANOVA test	W(3.000,23.07)=90.36 ****p<0.0001
Dunnett's T3 multiple comparisons test
		Mertk KO	Axl KO	Mertk Axl dKO
Mertk WT		****p<0.0001	*p=0.015	****p<0.0001
Mertk KO			****p<0.0001	*p=0.0353
Axl KO				****p<0.0001

## Sheet: RBPMS+
Figure 5- figure supplement 1
Central
Ordinary one-way ANOVA	F(5,34)=1.391 ns p=0.2522
Tukey's multiple comparisons test
		CX3CR1 KO	CR3 KO GFP/+	Mertk KO	Axl KO	Mertk Axl dKO
CX3CR1-GFP/+		ns	ns	ns	ns	ns
CX3CR1 KO			ns	ns	ns	ns
CR3 KO GFP/+				ns	ns	ns
Mertk KO					ns	ns
Axl KO						ns
Peripheral
Ordinary one-way ANOVA	F(5,33)=0.3259 ns p=0.8937
Tukey's multiple comparisons test
		CX3CR1 KO	CR3 KO GFP/+	Mertk KO	Axl KO	Mertk Axl dKO
CX3CR1-GFP/+		ns	ns	ns	ns	ns
CX3CR1 KO			ns	ns	ns	ns
CR3 KO GFP/+				ns	ns	ns
Mertk KO					ns	ns
Axl KO						ns

## Sheet: PLX_con microglia density
Figure 6
Welch's ANOVA	W(6,18.55)=16.53, ****p<0.0001
Dunnett's T3 multiple comparisons test
		BAX KO	CX3CR1 KO	CR3 KO GFP/+	Mertk KO	Axl KO	Mertk Axl dKO
CX3CR1-GFP/+		**p=0.005	ns p>.9999	ns p=0.9924	ns p=0.1153	***p=0.0004	**p=0.001
BAX KO			*p=0.0151	*p=0.0168	ns p=0.2030	ns p>.9999	ns p>.9999
CX3CR1 KO				ns p=0.7819	ns p=0.2158	***p=0.0008	**p=0.0021
CR3 KO GFP/+					ns p=0.1427	*p=0.0185	*p=0.0175
Mertk KO						***p=0.0002	*p=0.0394
Axl KO							ns p>.9999
