# Supplementary figures and images for: Neuronal apoptosis drives remodeling states of microglia and shifts in survival pathway dependence
Source: eLife journal article supplement (doi:10.7554/elife.76564), 2022-04-28

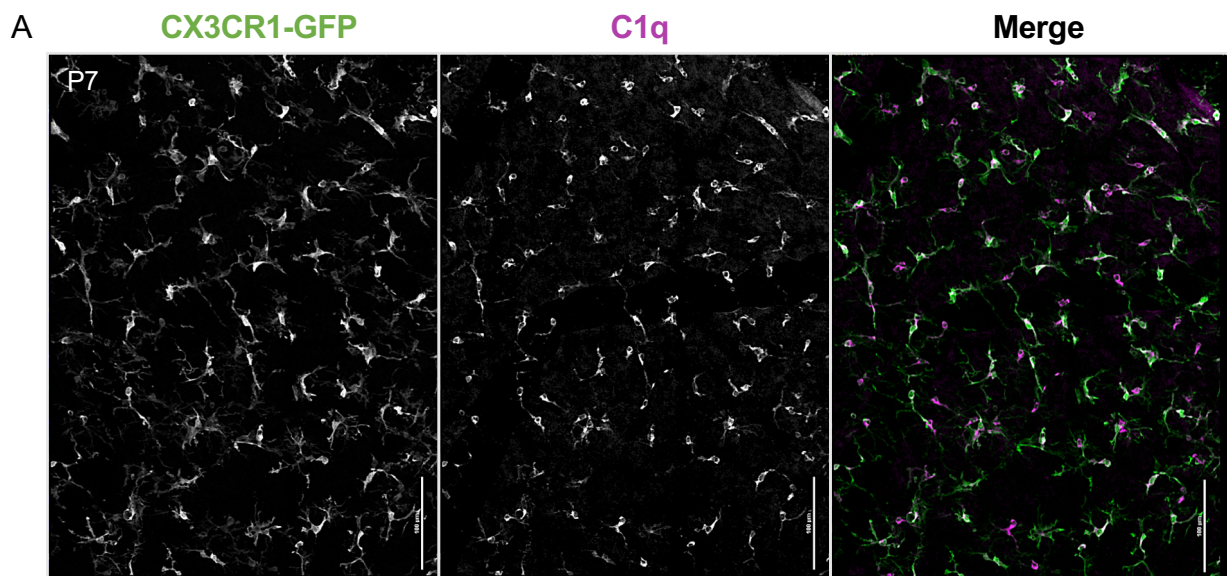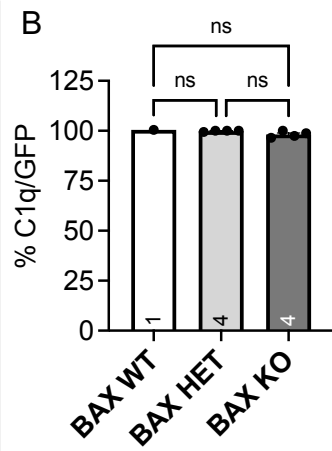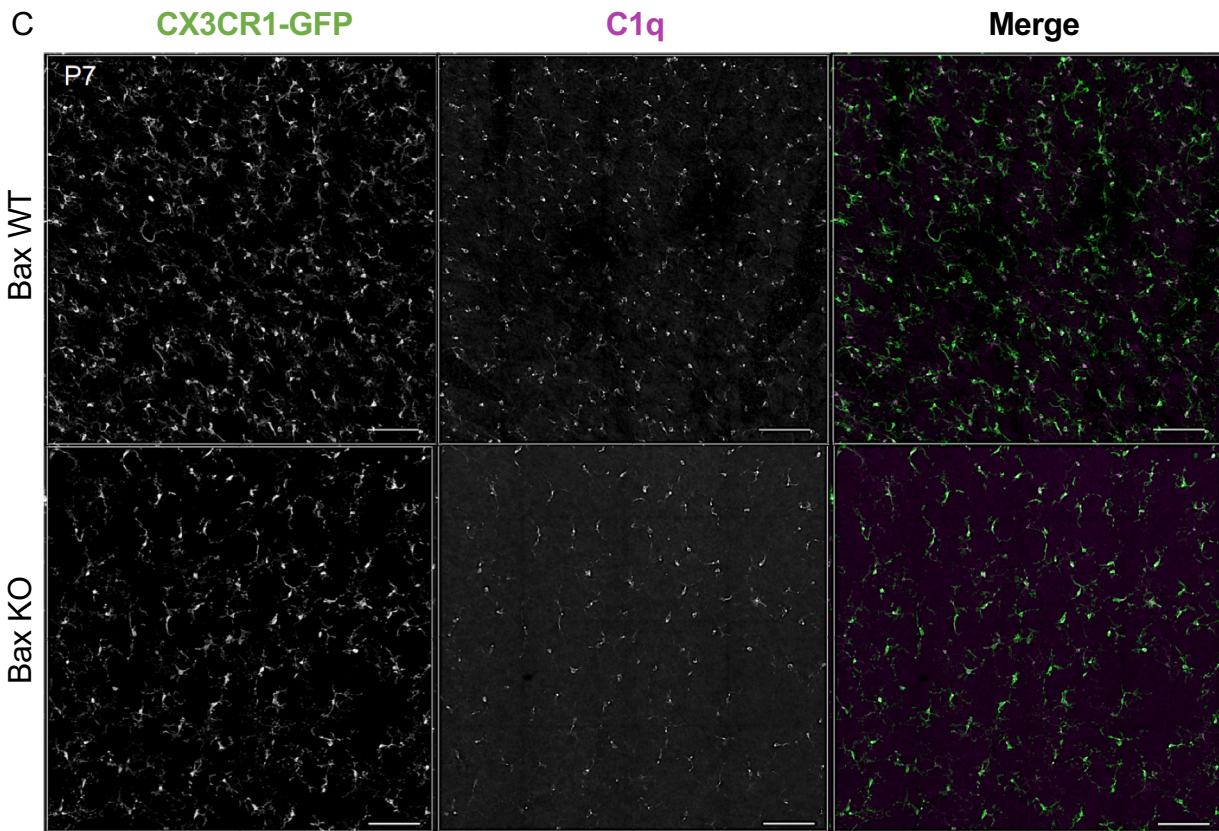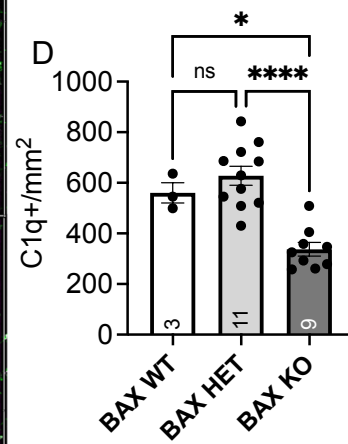

Supplement: supp [file elife-76564-supp-v1.zip]

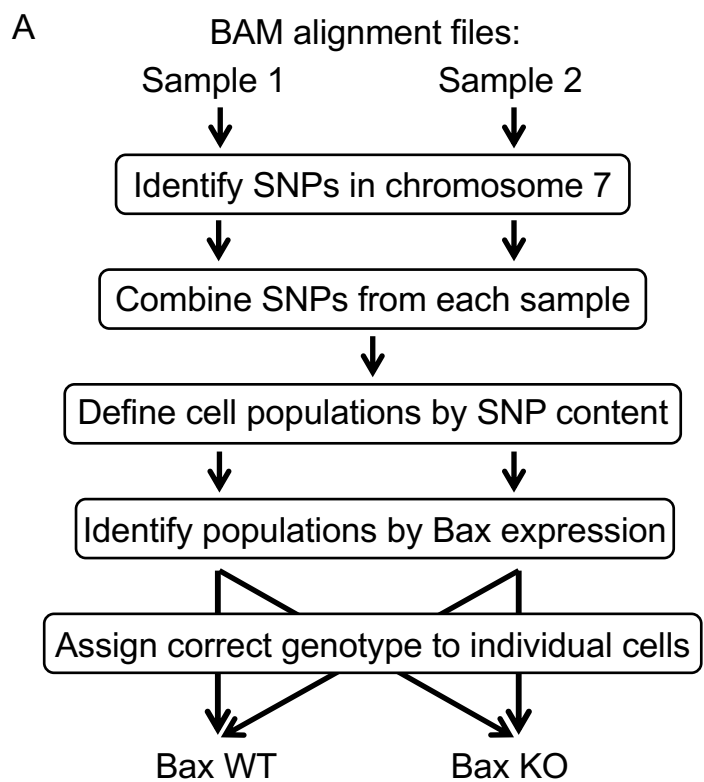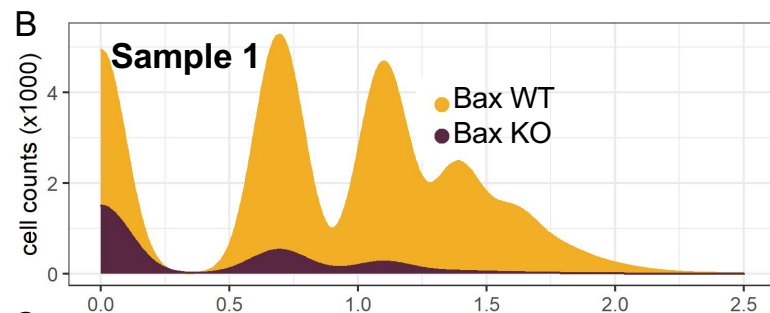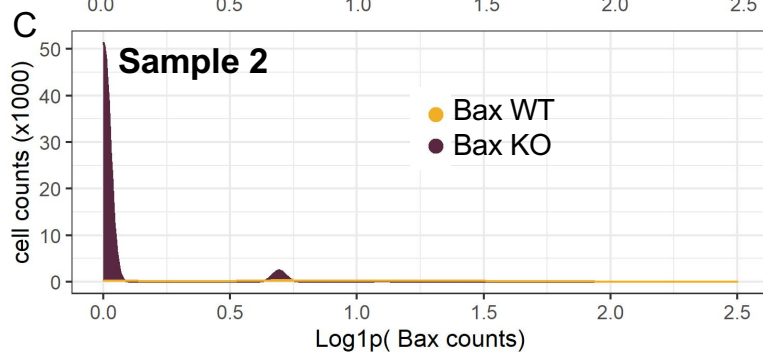

**D**

|          | # wt cells | # ko cells |
|----------|------------|------------|
| Sample 1 | 4,567      | 670        |
| Sample 2 | 335        | 3,554      |

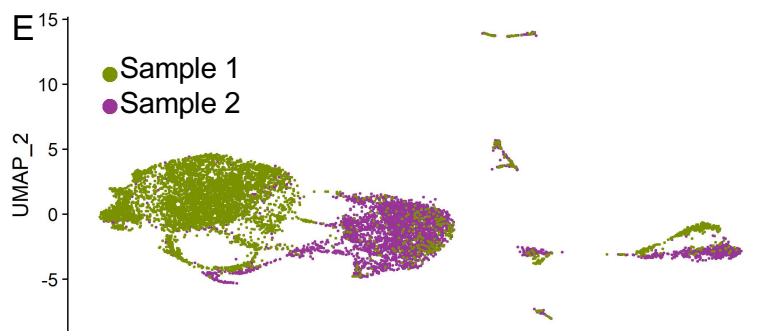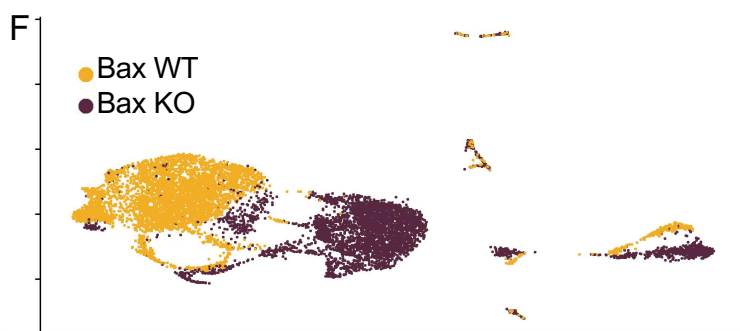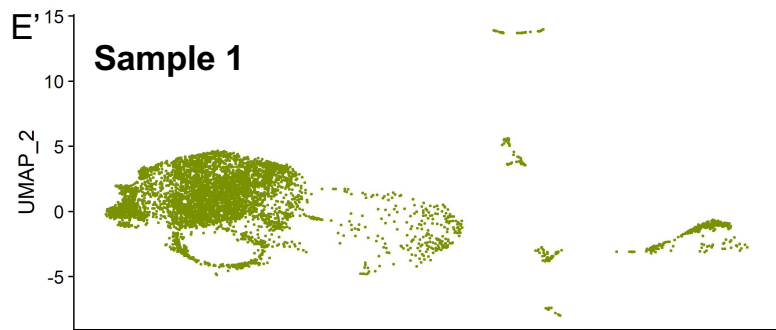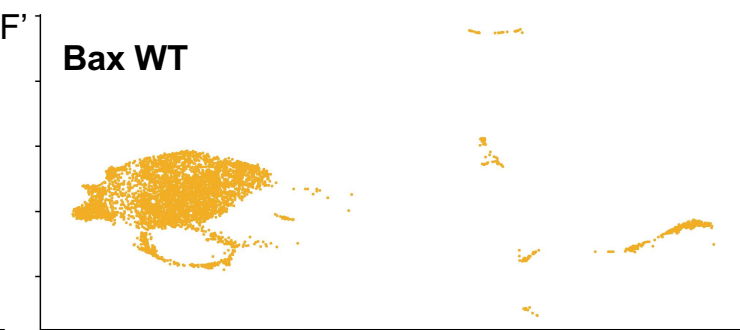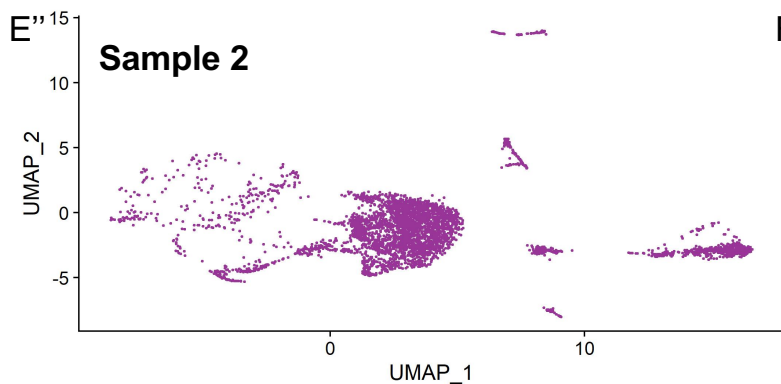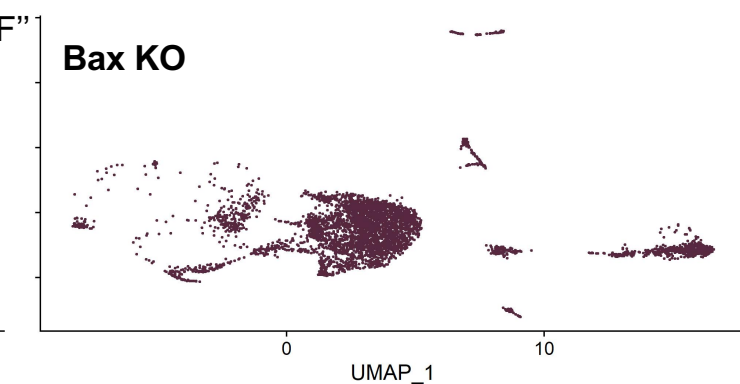

Supplement: supp [file elife-76564-supp-v1.zip]

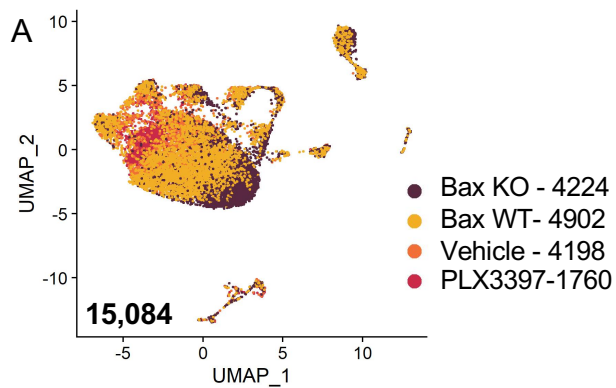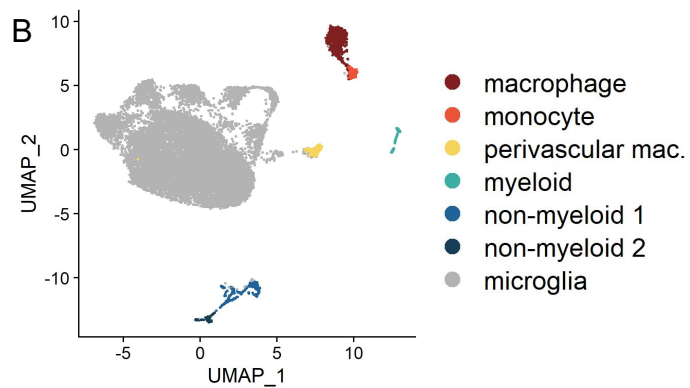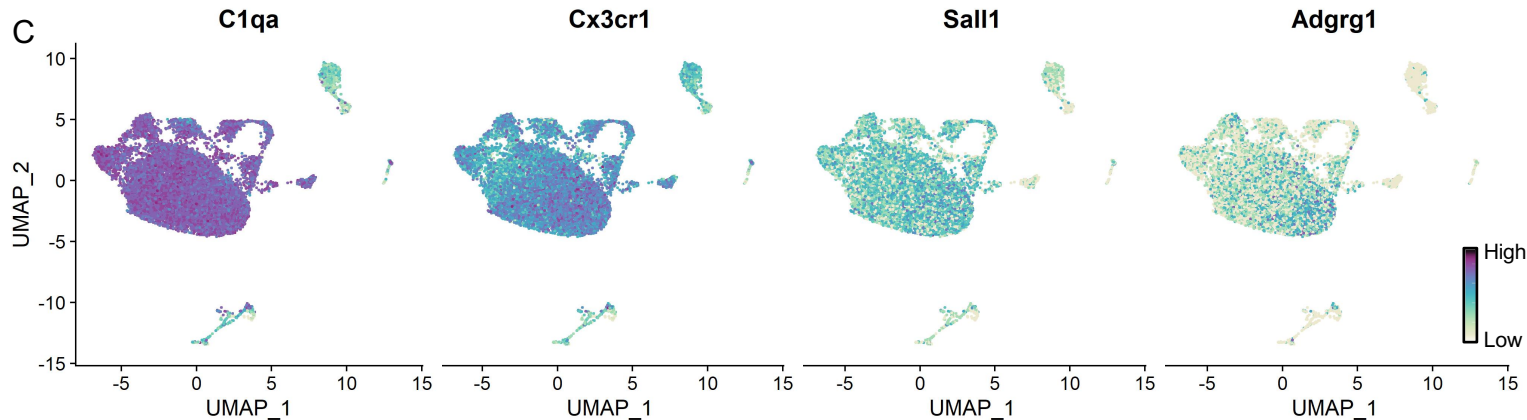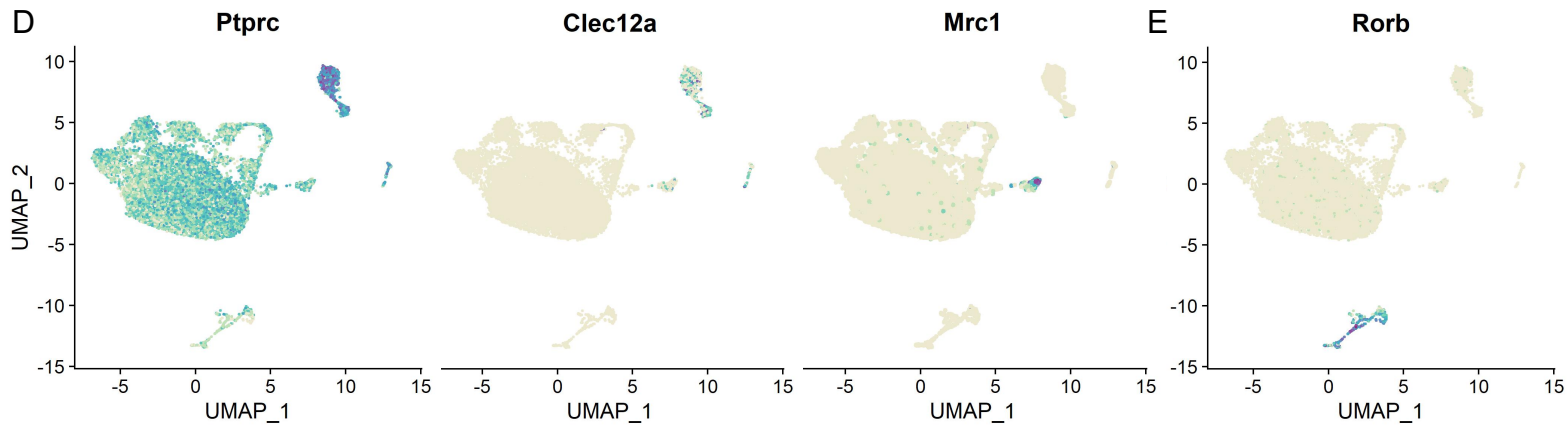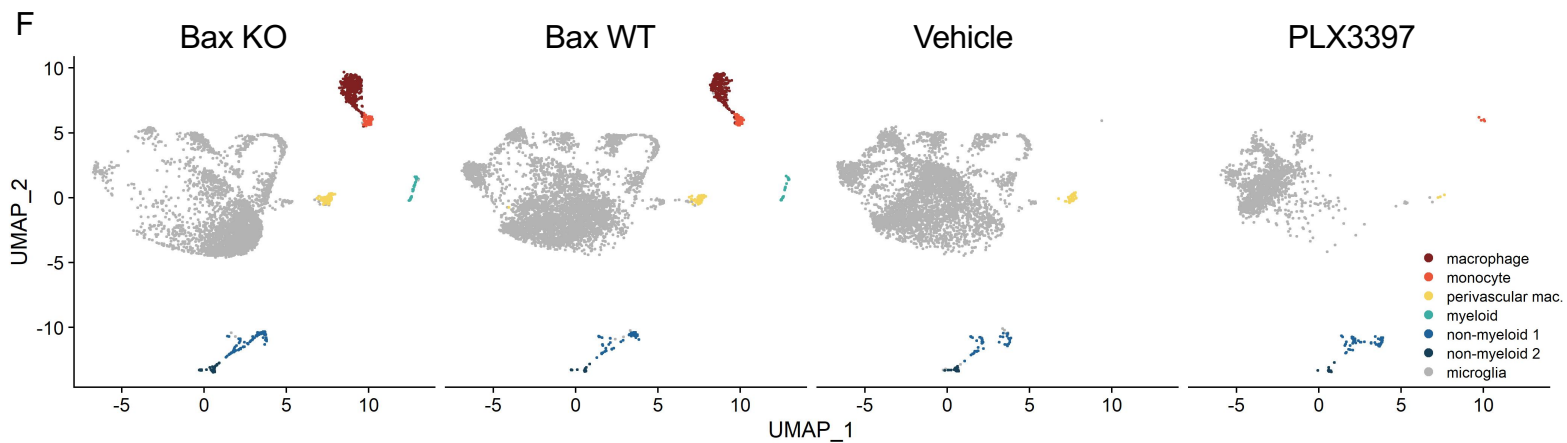

Supplement: supp [file elife-76564-supp-v1.zip]

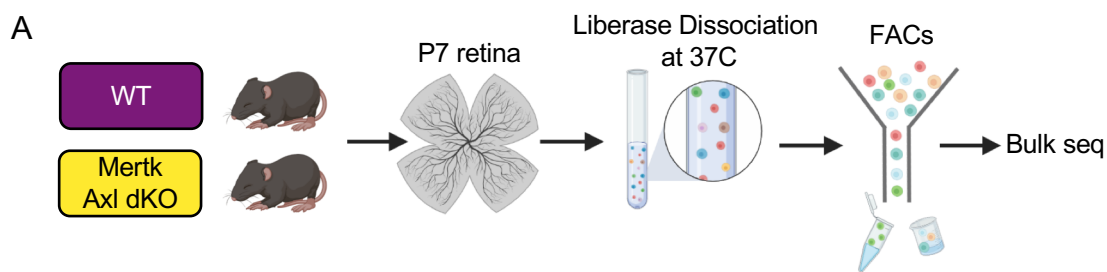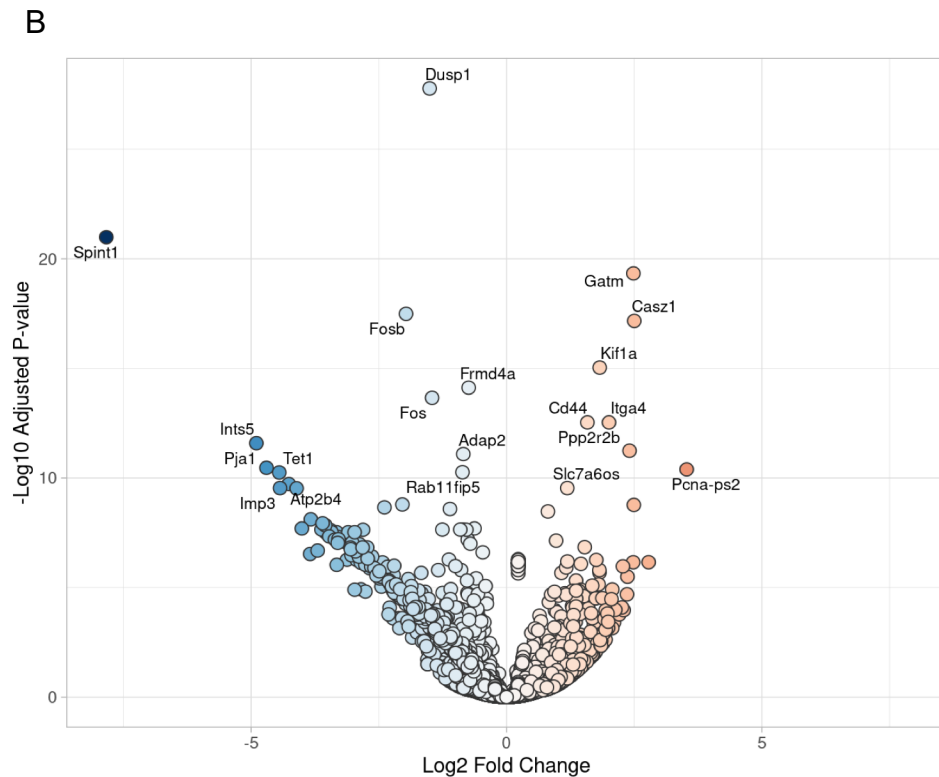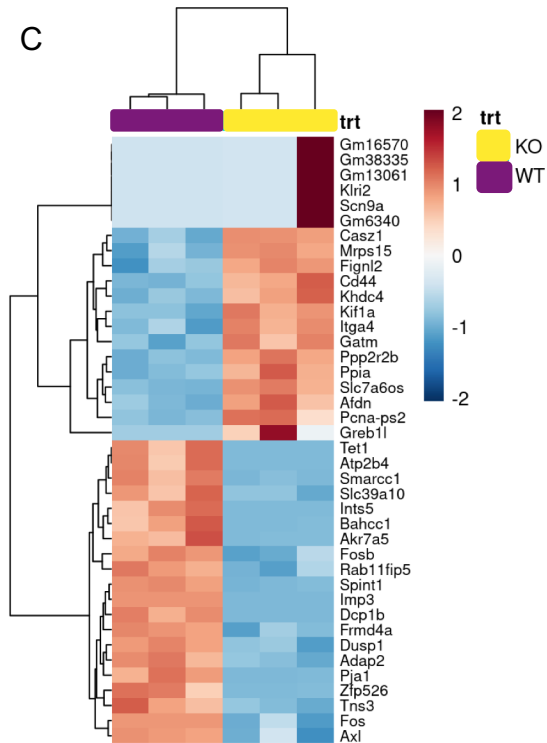

Supplement: supp [file elife-76564-supp-v1.zip]

## A Total CC3+ analysis

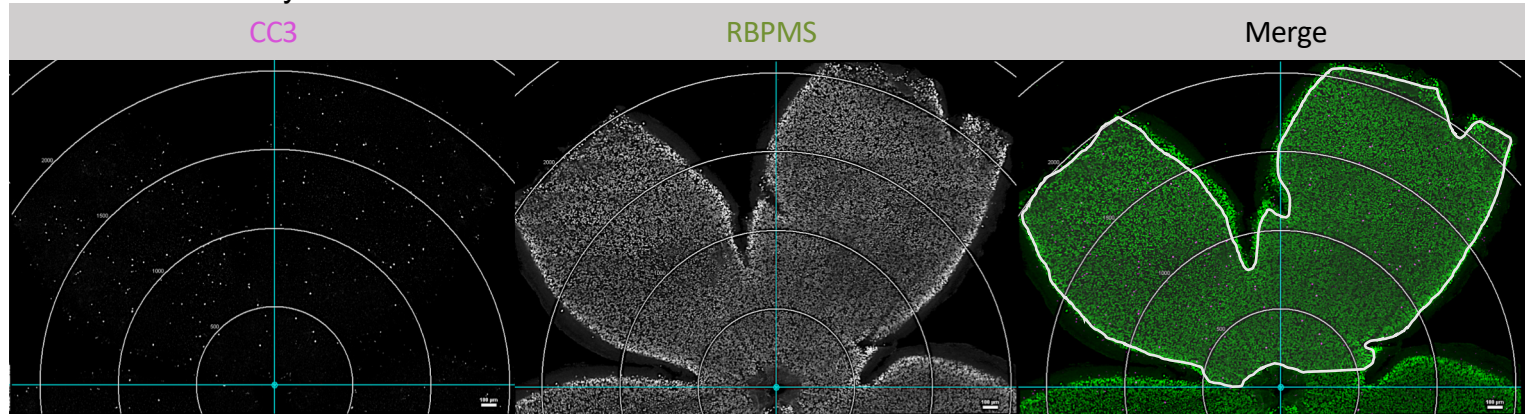

## B CC3+ RBPMS+ analysis

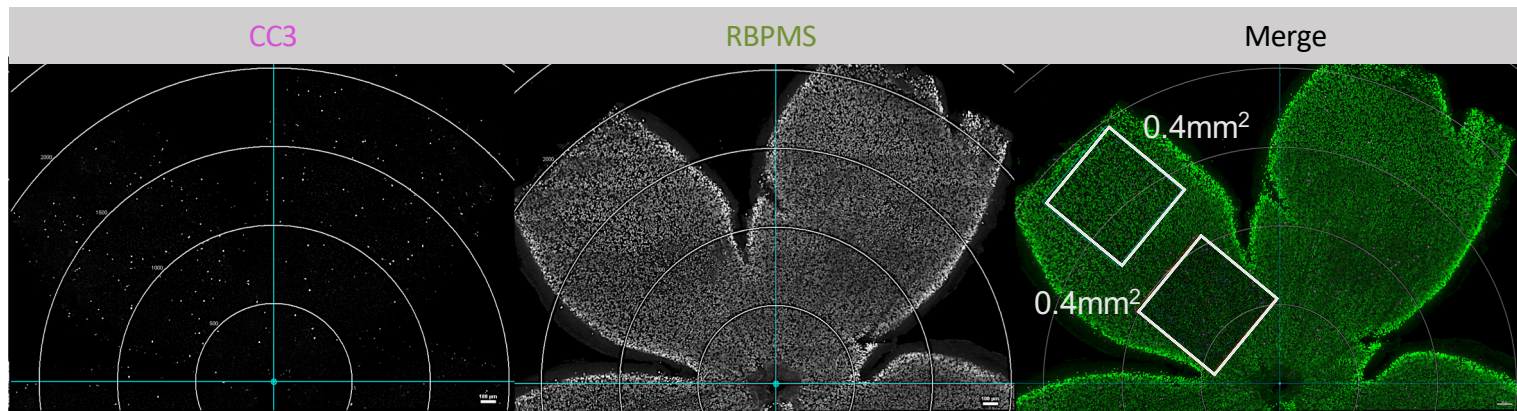

Supplement: supp [file elife-76564-supp-v1.zip]

A

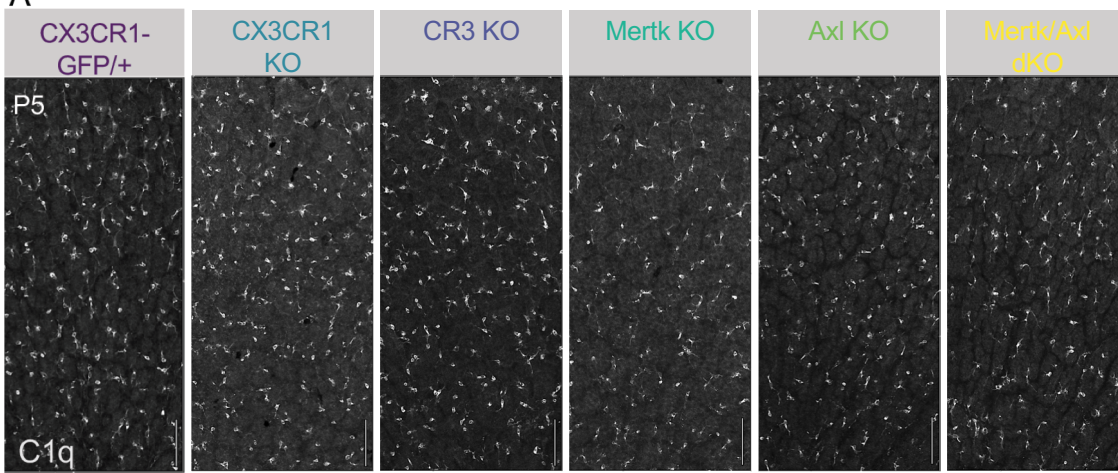

B

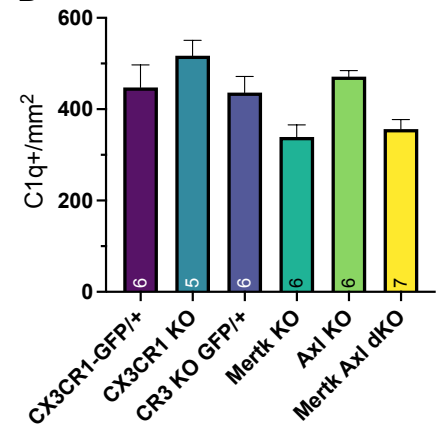

C

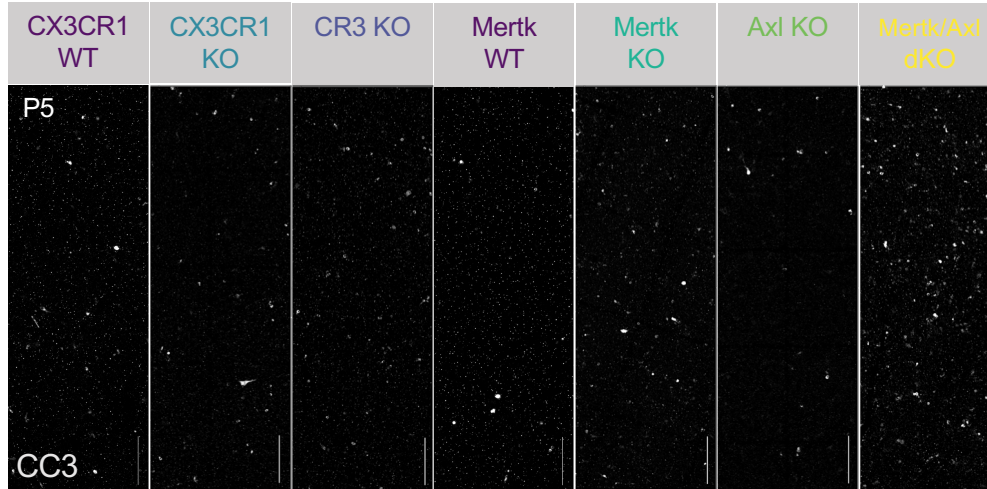

D

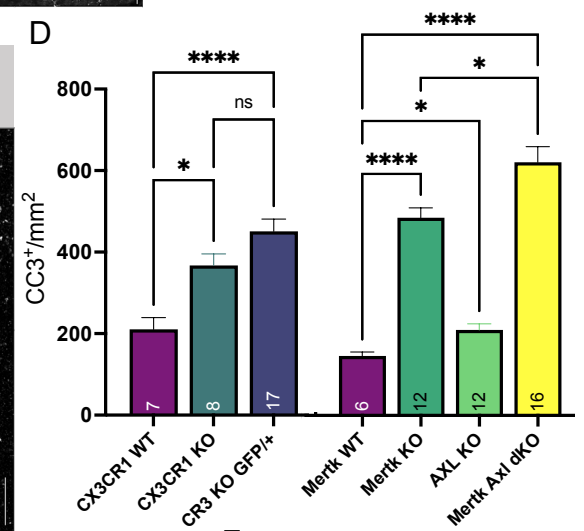

E

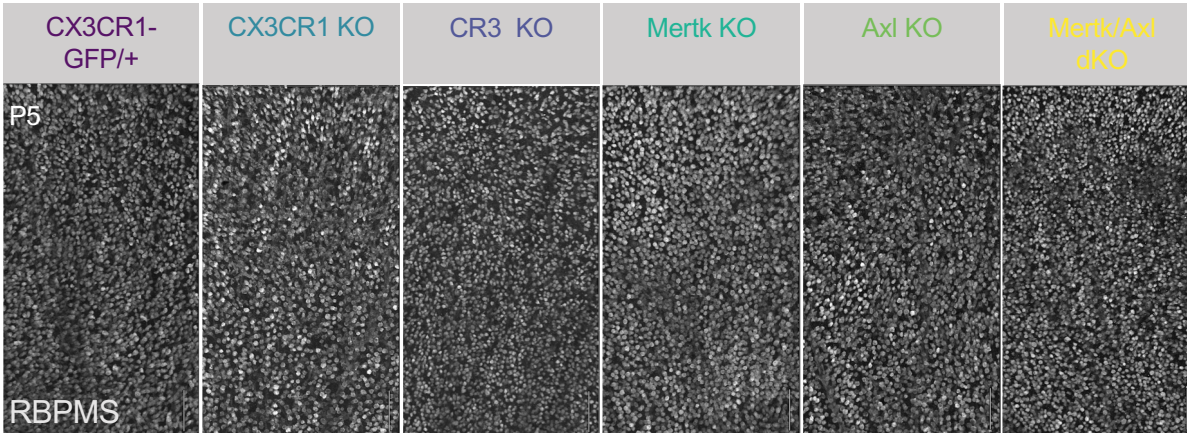

F

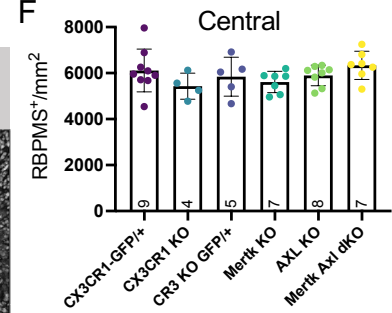

H

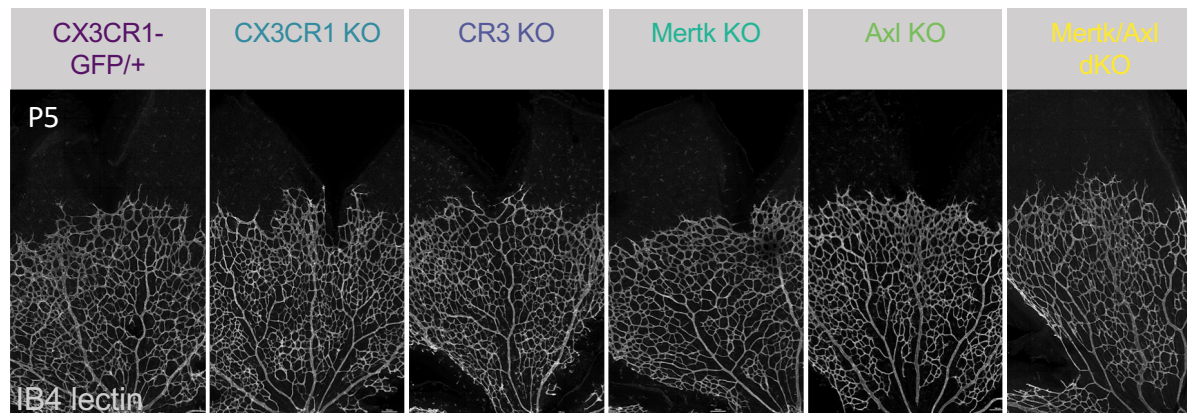

G

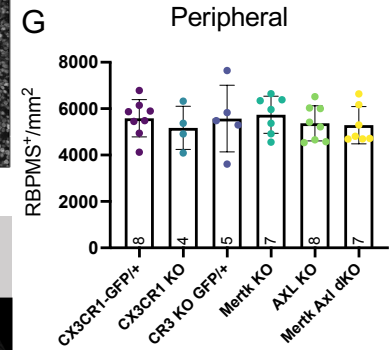

Supplement: supp [file elife-76564-supp-v1.zip]

A

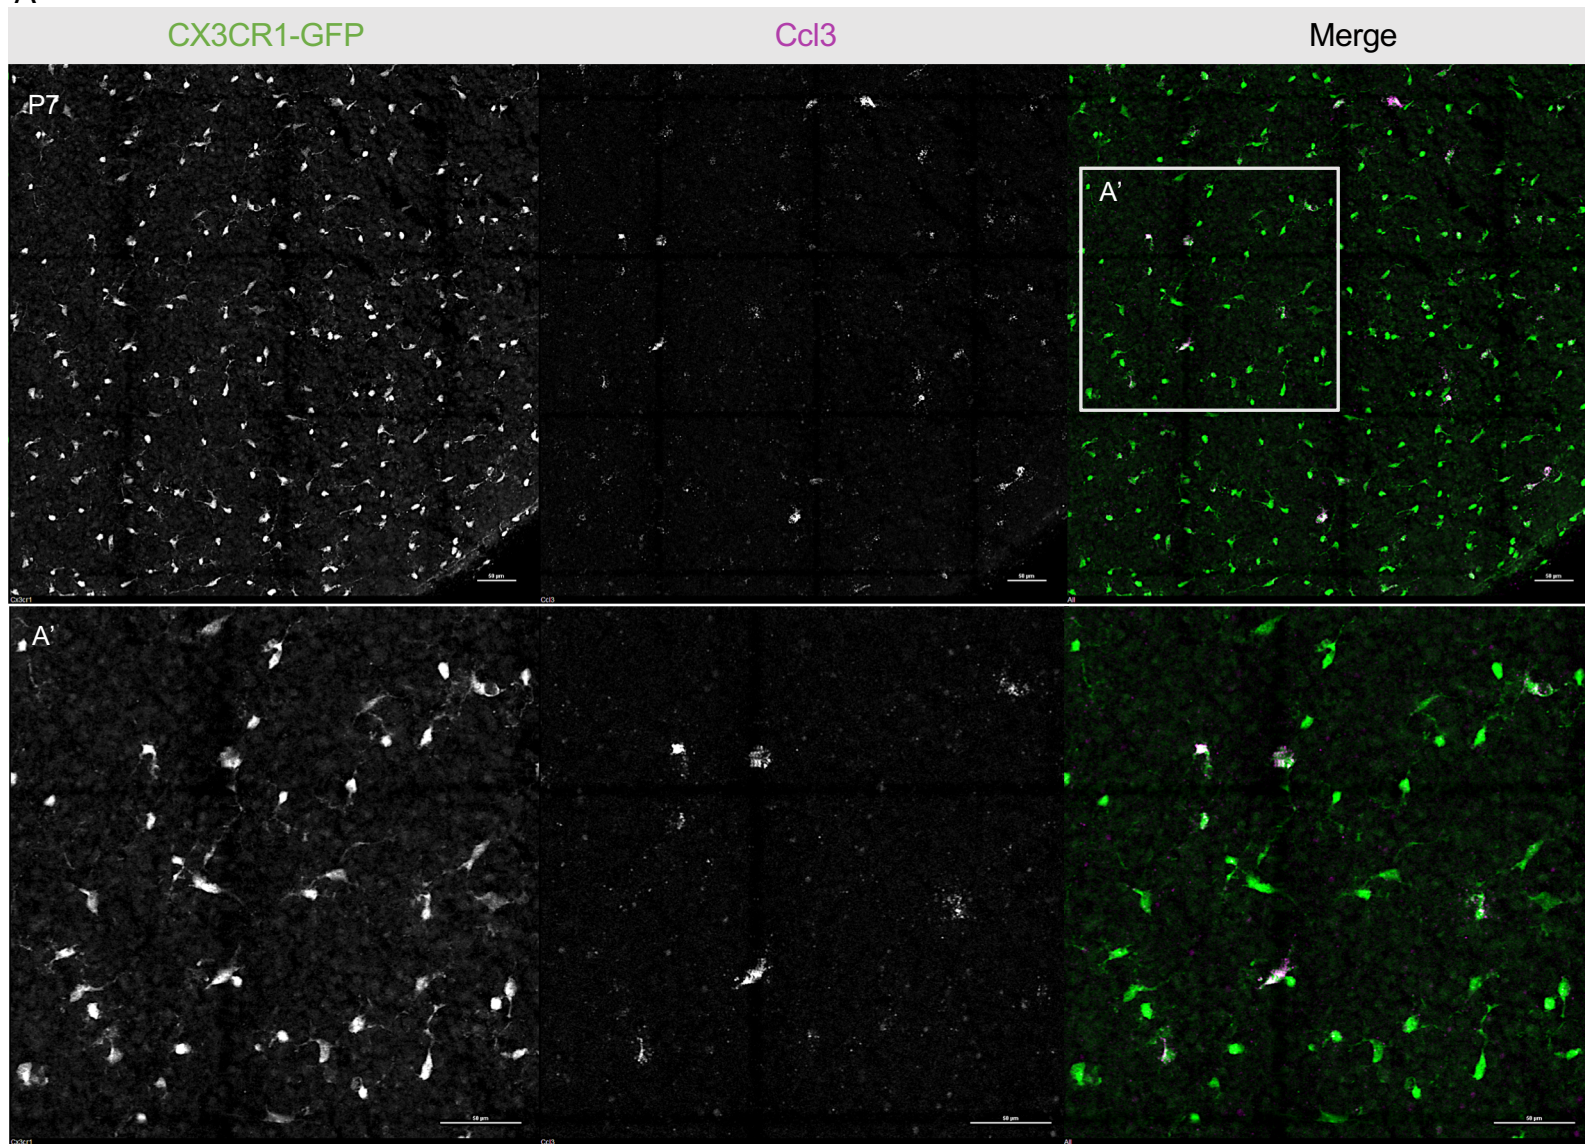

B

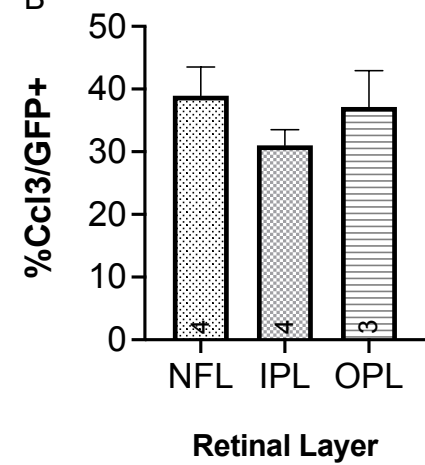

Supplement: supp [file elife-76564-supp-v1.zip]

A

Sample 1

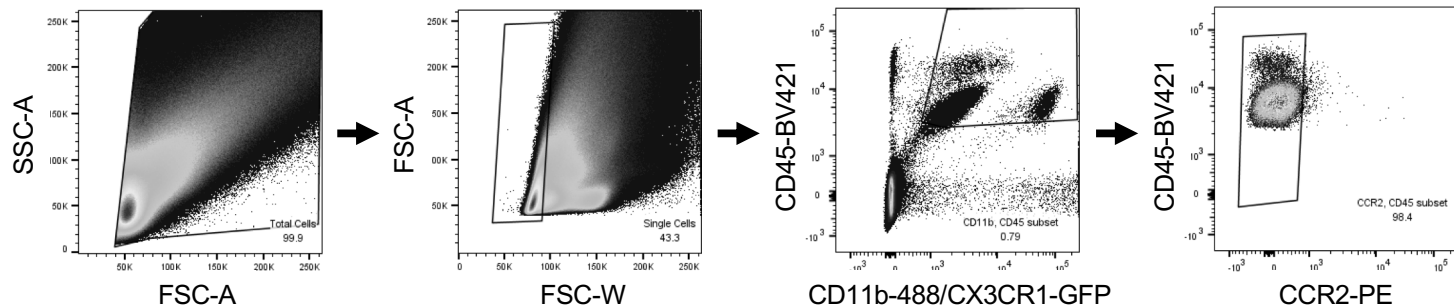

B

Sample 2

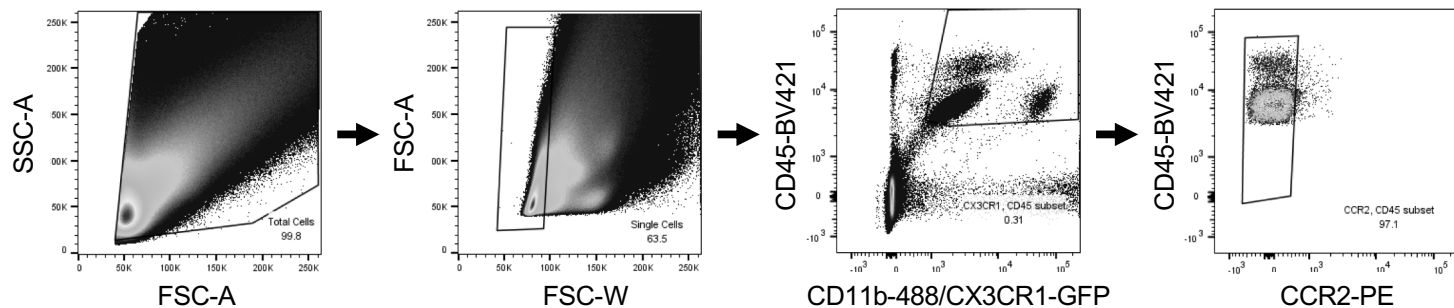

C

Vehicle

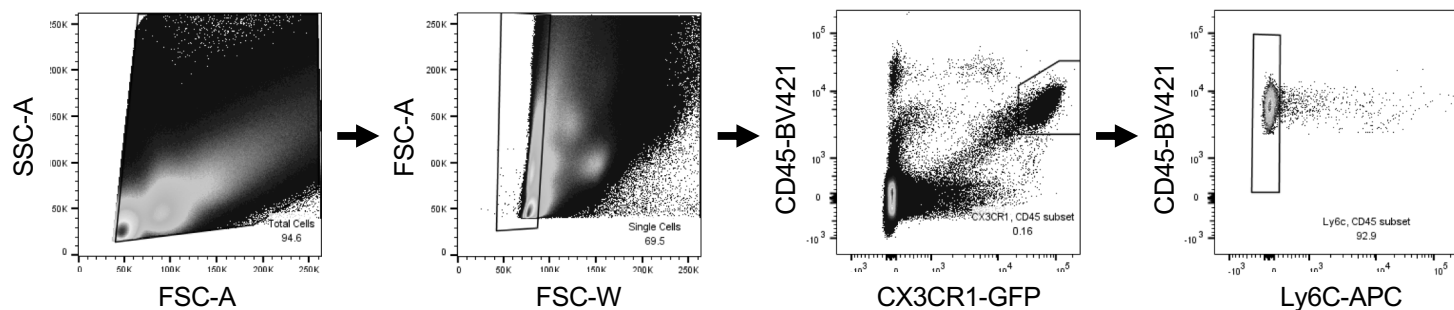

D

PLX3397

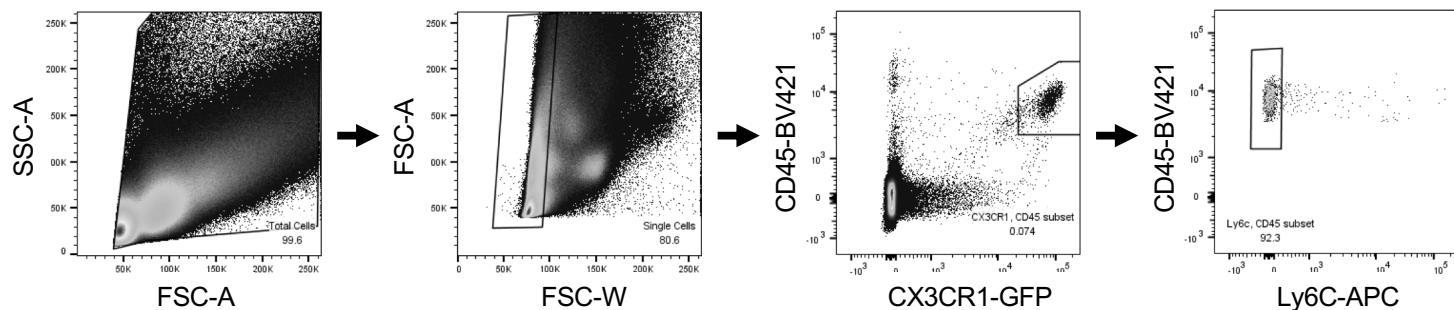

Supplement: supp [file elife-76564-supp-v1.zip]
